# Supplementary material
Source: publisher figshare collection journal article supplement (https://acs.figshare.com/ndownloader/files/4010155)

## Supporting Information

### Synthesis of (±)-Amathaspiramide F and Discovery of an Unusual Stereocontrolling Element for the [2,3]-Stevens Rearrangement

Arash Soheili and Uttam K. Tambar\*

*Department of Biochemistry, The University of Texas Southwestern Medical Center at Dallas, 5323 Harry Hines Boulevard, Dallas, Texas 75390-9038*

#### Table of Contents

|       |                                                       |      |
|-------|-------------------------------------------------------|------|
| I.    | Materials and Methods                                 | S-1  |
| II.   | Synthesis of Aminoesters                              | S-1  |
| III.  | Synthesis of Ethyl 1-Arylallyl Carbonates             | S-3  |
| IV.   | Table 1                                               | S-5  |
| V.    | Scheme 2 Compounds                                    | S-9  |
| VI.   | Scheme 3 Compounds                                    | S-11 |
| VII.  | Formal Synthesis of (±)-Amathaspiramide F             | S-12 |
| VIII. | Determination of Relative Stereochemistry of Products | S-16 |
| IX.   | <sup>1</sup> H and <sup>13</sup> C NMR Spectra        | S-19 |

#### I. Materials and Methods

**General Information:** All reactions were carried out under an atmosphere of nitrogen with magnetic stirring unless otherwise indicated. Commercially obtained reagents were used as received. Solvents were dried by passage through an activated alumina column under argon. Liquids and solutions were transferred via syringe. All reactions were monitored by thin-layer chromatography with E. Merck silica gel 60 F254 pre-coated plates (0.25 mm). All purifications were performed on a Teledyne Isco CombiFlash® Rf unless otherwise indicated. <sup>1</sup>H and <sup>13</sup>C NMR spectra were recorded on Varian Inova-400 spectrometers. Data for <sup>1</sup>H NMR spectra are reported relative to chloroform as an internal standard (7.26 ppm) and are reported as follows: chemical shift (δ ppm), multiplicity, coupling constant (Hz), and integration. Data for <sup>13</sup>C NMR spectra are reported relative to chloroform as an internal standard (77.2 ppm) and are reported in terms of chemical shift (δ ppm). Infrared spectra were recorded on a Perkin-Elmer 1000 series FTIR. HRMS data were obtained at The Scripps Center for Mass Spectrometry.

#### II. Synthesis of Aminoesters

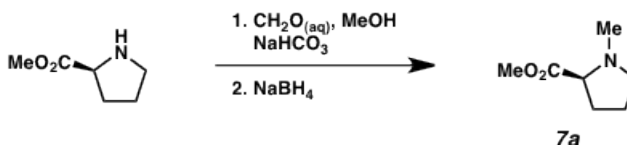

**Methyl 1-methylpyrrolidine-2-carboxylate (7a):** In a round-bottom flask, a solution of L-proline methyl ester hydrochloride (1.6 g, 10.0 mmol) in MeOH (10 mL) was cooled to 0 °C.

Solid  $\text{NaHCO}_3$  (840 mg, 10 mmol) was added, and the reaction was stirred for 5 min. Aqueous formaldehyde (1.7 mL, 20 mmol, 35 wt%) was subsequently added, and the reaction was stirred for 2 h. The mixture was treated with  $\text{NaBH}_4$  (570 mg, 15 mmol) in small portions. After 1 h, the solution was diluted with 1N  $\text{NaOH}$  (50 mL) and extracted with  $\text{EtOAc}$  (3 x 100 mL). The combined organic phase was washed with brine, dried over  $\text{MgSO}_4$ , and concentrated under reduced pressure. Purification by CombiFlash Rf (100%  $\text{CH}_2\text{Cl}_2$  to 7:3  $\text{CH}_2\text{Cl}_2$ : $\text{EtOAc}$  with 1%  $\text{MeOH}$  eluent, 14 min) provided the desired product as a clear oil (1.16 g, 81%): Spectral data was identical to literature values.<sup>1</sup>

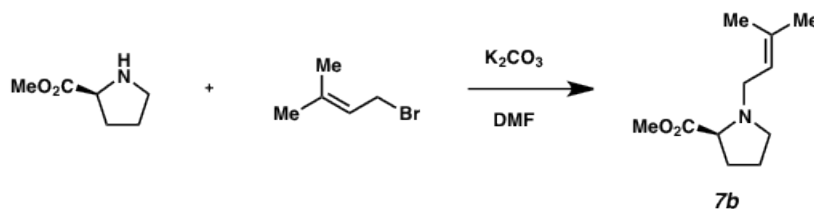

**Methyl 1-(3-methylbut-2-en-1-yl) pyrrolidine-2-carboxylate (7b):** A round-bottom flask containing L-proline methyl ester hydrochloride (0.98 g, 5.9 mmol) in DMF (12 mL) was charged with  $\text{K}_2\text{CO}_3$  (3.3 g, 23.6 mmol) and 3,3-dimethylallyl bromide (1.06 g, 7.1 mmol). The reaction was stirred for 16 h and then diluted with  $\text{H}_2\text{O}$  (30 mL). The mixture was extracted with  $\text{EtOAc}$  (3 x 75 mL). The combined organic phase was washed with brine, dried over  $\text{MgSO}_4$ , and concentrated under reduced pressure. Purification by CombiFlash Rf (100% hexanes to 7:3 hexanes: $\text{EtOAc}$  eluent, 12 min) provided the desired product as a clear oil (0.87 g, 75%):  $^1\text{H}$  NMR (400 MHz,  $\text{CDCl}_3$ )  $\delta$  5.25 (t,  $J = 7.0$  Hz, 1H), 3.67 (s, 3H), 3.26-3.20 (m, 1H), 3.16-3.02 (m, 3H), 2.32 (q,  $J = 8.2$  Hz, 1H), 2.13-2.03 (m, 1.0), 1.94-1.84 (m, 2H), 1.80-1.64 (m, 1H), 1.67 (s, 3H), 1.61 (s, 3H);  $^{13}\text{C}$  NMR (100 MHz,  $\text{CDCl}_3$ )  $\delta$  174.6, 135.0, 120.9, 65.3, 53.4, 51.6, 29.4, 25.7, 23.0, 17.7; IR (film) 2952, 1748, 1435, 1277, 1196, 1171, 1039, 1005, 755  $\text{cm}^{-1}$ ; HRMS (ESI-TOF) calc'd for  $[\text{C}_{11}\text{H}_{19}\text{NO}_2]^+ ([\text{M}+\text{H}]^+)$ :  $m/z$  198.1488, found 198.1495.

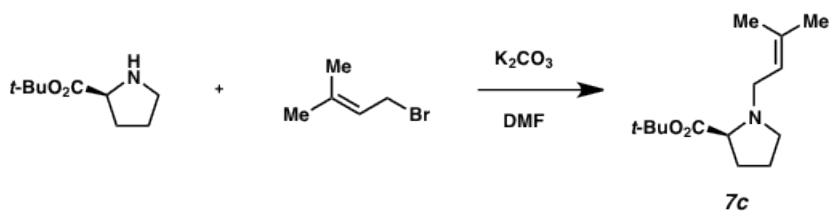

**Tert-butyl 1-(3-methylbut-2-en-1-yl) pyrrolidine-2-carboxylate (7c):** A round-bottom flask containing L-proline *tert*-butyl ester (690 mg, 4.0 mmol) in DMF (8.0 mL) was charged with  $\text{K}_2\text{CO}_3$  (2.2 g, 16.0 mmol) and 3,3-dimethylallyl bromide (715 mg, 4.8 mmol). The reaction was stirred for 16 h and then diluted with  $\text{H}_2\text{O}$  (30 mL). The mixture was extracted with  $\text{EtOAc}$  (3 x 75 mL). The organic phase was washed with brine, dried over  $\text{MgSO}_4$ , and concentrated under reduced pressure. Purification by CombiFlash Rf (100% hexanes to 7:3 hexanes: $\text{EtOAc}$  eluent, 12 min) provided the desired product as a clear oil (590 mg, 62%):  $^1\text{H}$  NMR (400 MHz,  $\text{CDCl}_3$ )  $\delta$  5.22 (t,  $J = 7.0$  Hz, 1H), 3.27-3.20 (m, 1H), 3.08-3.92 (m, 3H), 2.28 (q,  $J = 8.2$  Hz, 1H), 2.05-1.94 (m, 1.0), 1.87-1.75 (m, 2H), 1.71-1.55 (m, 1H), 1.63 (s, 3H), 1.57 (s, 3H), 1.38 (s, 9H);  $^{13}\text{C}$  NMR (100 MHz,  $\text{CDCl}_3$ )  $\delta$  173.3, 134.3, 121.3, 80.2, 65.7, 53.3, 51.4, 29.2, 28.0, 25.8,

<sup>1</sup> Langenskiöld, T.; Lounasmaa, M. *Heterocycles*, **1983**, 20, 671.

22.8, 17.8; IR (film) 2957, 1743, 1455, 1367, 1153, 848, 771  $\text{cm}^{-1}$ ; HRMS (ESI-TOF) calc'd for  $[\text{C}_{14}\text{H}_{25}\text{NO}_2]^+([\text{M}+\text{H}]^+)$ :  $m/z$  240.1958, found 240.1987.

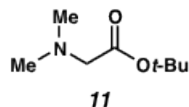

***N,N*-Dimethylglycine *tert*-butyl ester (11):** The compound was synthesized according to a method reported in the literature. Spectral data was identical to literature values.<sup>2</sup>

### III. Synthesis of Ethyl 1-Arylallyl Carbonates

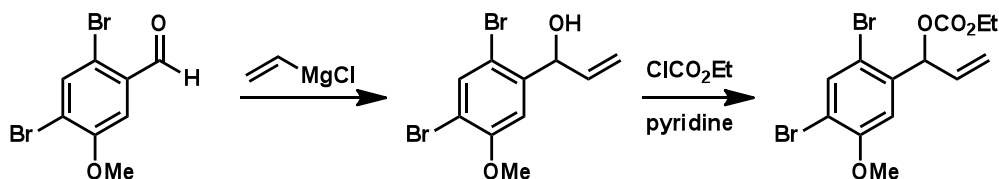

**Ethyl 1-(2,4-dibromo-5-methoxyphenyl)allyl carbonate (6a):** In a flame dried round-bottom flask, vinyl magnesium chloride (3.2 mL, 5.2 mmol, 1.6 M THF) was diluted in THF (15 mL) and cooled to  $-10\text{ }^{\circ}\text{C}$  (acetone/ice). A solution of 2,4-dibromo-5-methoxybenzaldehyde<sup>3</sup> (1.27 g, 4.3 mmol) in THF (3 mL) was added dropwise. After 1 h, the reaction was diluted with aqueous  $\text{NH}_4\text{Cl}$  (50 mL) and extracted with EtOAc (3 x 100 mL). The organic phase was washed with brine, dried over  $\text{MgSO}_4$ , and concentrated under reduced pressure. Purification by CombiFlash Rf (100% hexanes to 8:2 hexanes:EtOAc eluent, 12 min) provided the desired vinyl alcohol as a white solid (1.11 g, 80%).

The obtained vinyl alcohol (1.11 g, 3.4 mmol) and pyridine (0.90 mL, 10.2 mmol) were dissolved in  $\text{CH}_2\text{Cl}_2$  (7.0 mL). The reaction was cooled to  $0\text{ }^{\circ}\text{C}$  and charged dropwise with ethyl chloroformate (0.49 mL, 5.1 mmol). Upon complete addition, the reaction was allowed to warm to room temperature and monitored by TLC for full conversion. The mixture was diluted with EtOAc (100 mL) and washed with aqueous 1N HCl (2 x 30 mL), saturated aqueous  $\text{NaHCO}_3$  (30 mL) and brine. Purification by CombiFlash Rf (100% hexanes to 8:2 hexanes:EtOAc eluent, 12 min) provided the desired product as a clear oil (1.3 g, 99%):  $^1\text{H}$  NMR (400 MHz,  $\text{CDCl}_3$ )  $\delta$  7.72 (s, 1H), 6.95 (s, 1H), 6.38 (dt,  $J = 5.9\text{ Hz}$ ,  $J = 1.3\text{ Hz}$ , 1H), 6.00-5.90 (m, 1H), 5.35 (dt,  $J = 17.2\text{ Hz}$ ,  $J = 1.2\text{ Hz}$ , 1H), 5.29 (dt,  $J = 10.5\text{ Hz}$ ,  $J = 1.2\text{ Hz}$ , 1H), 4.25-4.17 (m, 2H), 3.88 (s, 3H), 1.31 (t,  $J = 7.2\text{ Hz}$ , 3H);  $^{13}\text{C}$  NMR (100 MHz,  $\text{CDCl}_3$ )  $\delta$  155.8, 153.9, 138.2, 136.4, 133.9, 118.2, 113.0, 112.3, 110.9, 78.1, 64.5, 56.5, 14.2; IR (film) 2982, 1748, 1584, 1472, 1370, 1220, 1169, 1007, 874, 789  $\text{cm}^{-1}$ ; HRMS (ESI-TOF) calc'd for  $[\text{C}_{13}\text{H}_{14}\text{Br}_2\text{O}_4]^+([\text{M}+\text{Na}]^+)$ :  $m/z$  414.9151, found 414.9136.

<sup>2</sup> Soheili, A.; Tambar, U. K. *J. Am. Chem. Soc.* **2011**, *133*, 12956.

<sup>3</sup> Osuna, M. R.; Aguirre, G.; Somanathan, R.; Molins, E. *Tetrahedron: Asymmetry*, **2002**, *13*, 2261

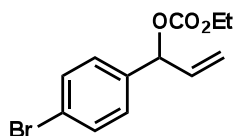

**Ethyl 1-(4-bromophenyl)allyl carbonate (6b):** Following the procedure for synthesizing carbonate **6a**, carbonate **6b** was obtained as a clear oil. Spectral data was identical to literature values.<sup>2</sup>

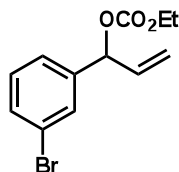

**Ethyl 1-(3-bromophenyl)allyl carbonate (6c):** Following the procedure for synthesizing carbonate **6a**, carbonate **6c** was obtained as a clear oil: <sup>1</sup>H NMR (400 MHz, CDCl<sub>3</sub>) δ 7.53 (t, *J* = 1.8 Hz, 1H), 7.44 (ddd, *J* = 7.4 Hz, *J* = 1.9 Hz, *J* = 1.2 Hz, 1H), 7.30 (d, *J* = 7.7 Hz, 1H), 7.23 (t, *J* = 7.8 Hz, 1H), 6.05-5.95 (m, 2H), 5.40-5.28 (m, 2H), 4.26-4.16 (m, 2H), 1.32 (t, *J* = 7.1 Hz, 3H); <sup>13</sup>C NMR (100 MHz, CDCl<sub>3</sub>) δ 154.2, 140.6, 135.2, 131.4, 130.2, 130.0, 125.7, 122.7, 118.1, 79.0, 64.3, 14.2; IR (film) 2985, 1747, 1573, 1476, 1371, 1222, 1093, 1008, 937, 880, 787, 702 cm<sup>-1</sup>; HRMS (ESI-TOF) calc'd for [C<sub>12</sub>H<sub>13</sub>BrO<sub>3</sub>]<sup>+</sup>([M+Na]<sup>+</sup>): *m/z* 306.9940, found 306.9937.

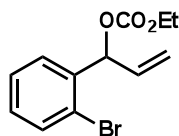

**Ethyl 1-(2-bromophenyl)allyl carbonate (6d):** Following the procedure for synthesizing carbonate **6a**, carbonate **6d** was obtained as a clear oil: <sup>1</sup>H NMR (400 MHz, CDCl<sub>3</sub>) δ 7.57 (dd, *J* = 8.0 Hz, *J* = 1.1 Hz, 1H), 7.47 (dd, *J* = 7.8 Hz, *J* = 1.7 Hz, 1H), 7.34 (td, *J* = 7.8 Hz, *J* = 1.1 Hz, 1H), 7.18 (td, *J* = 8.0 Hz, *J* = 1.7 Hz, 1H), 6.48 (dt, *J* = 5.8 Hz, *J* = 1.4 Hz, 1H), 6.05-5.96 (m, 1H), 5.37 (dt, *J* = 17.2 Hz, *J* = 1.5 Hz, 1H), 5.30 (dt, *J* = 10.5 Hz, *J* = 1.2 Hz, 1H), 4.27-4.15 (m, 2H), 1.31 (t, *J* = 7.1 Hz, 3H); <sup>13</sup>C NMR (100 MHz, CDCl<sub>3</sub>) δ 154.1, 137.9, 134.3, 132.9, 129.6, 128.1, 127.8, 122.7, 117.9, 78.4, 64.3, 14.2; IR (film) 2983, 1746, 1573, 1476, 1371, 1221, 1093, 1005, 937, 880, 787, 702 cm<sup>-1</sup>; HRMS (ESI-TOF) calc'd for [C<sub>12</sub>H<sub>13</sub>BrO<sub>3</sub>]<sup>+</sup>([M+Na]<sup>+</sup>): *m/z* 306.9940, found 306.9937.

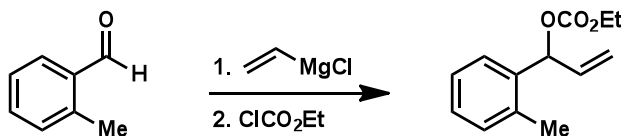

**Ethyl 1-(2-methylphenyl)allyl carbonate (6e):** In a flame dried round-bottom flask, vinyl magnesium chloride (4.4 mL, 7.0 mmol, 1.6 M THF) was diluted in THF (15 mL) and cooled to -10 °C (acetone/ice). A solution of 2-methylbenzaldehyde (600 mg, 5.0 mmol) in THF (3 mL) was added dropwise. After 45 min, the reaction was charged with ethyl chloroformate (813 mg, 7.5 mmol) dropwise and stirred for 10 min before warming to room temperature. After 1 h, the reaction was diluted with aqueous NH<sub>4</sub>Cl (50 mL) and extracted with EtOAc (3 x 100 mL). The organic phase was washed with brine, dried over MgSO<sub>4</sub>, and concentrated under reduced

pressure. Purification by CombiFlash Rf (100% hexanes to 8:2 hexanes:EtOAc eluent, 12 min) provided the desired product as a clear oil (770 mg, 70%):  $^1\text{H}$  NMR (400 MHz,  $\text{CDCl}_3$ )  $\delta$  7.44-7.40 (m, 1H), 7.25-7.25 (m, 2H), 7.20-7.16 (m, 1H), 6.30 (dt,  $J = 5.9$  Hz,  $J = 1.2$  Hz, 1H), 6.09-5.99 (m, 1H), 5.29 (dt,  $J = 6.2$  Hz,  $J = 1.3$  Hz, 1H), 5.26 (d,  $J = 1.4$  Hz, 1H), 4.27-4.14 (m, 2H), 2.41 (s, 3H), 1.31 (t,  $J = 7.1$  Hz, 3H);  $^{13}\text{C}$  NMR (100 MHz,  $\text{CDCl}_3$ )  $\delta$  154.5, 136.6, 135.5, 135.3, 130.5, 128.2, 126.8, 126.3, 117.4, 64.1, 19.2, 14.3; IR (film) 2985, 1747, 1371, 1221, 1087, 1008, 968, 939, 879, 790, 759, 729  $\text{cm}^{-1}$ ; HRMS (ESI-TOF) calc'd for  $[\text{C}_{13}\text{H}_{16}\text{O}_3]^+([\text{M}+\text{Na}]^+)$ :  $m/z$  243.0992, found 243.0998.

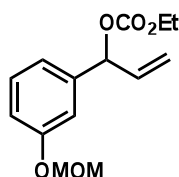

**Ethyl 1-[3-(methoxymethoxy)phenyl]allyl carbonate (6f):** Following the procedure for synthesizing carbonate **6e**, carbonate **6f** was obtained as a clear oil:  $^1\text{H}$  NMR (400 MHz,  $\text{CDCl}_3$ )  $\delta$  7.30-7.24 (m, 1H), 7.05-6.97 (m, 3H), 6.06-5.97 (m, 2H), 5.40-5.32 (m, 1H), 5.31-5.23 (m, 1H), 5.16 (s, 2H), 4.25-4.12 (m, 2H), 3.46 (s, 3H), 1.29 (t,  $J = 7.1$  Hz, 3H);  $^{13}\text{C}$  NMR (100 MHz,  $\text{CDCl}_3$ )  $\delta$  157.4, 154.3, 140.0, 135.7, 129.7, 120.4, 117.5, 115.9, 115.0, 94.4, 79.7, 64.1, 56.0, 14.2; IR (film) 2985, 1747, 1588, 1488, 1253, 1152, 1080, 1010, 924, 867, 789. 700  $\text{cm}^{-1}$ ; HRMS (ESI-TOF) calc'd for  $[\text{C}_{14}\text{H}_{18}\text{O}_5]^+([\text{M}+\text{Na}]^+)$ :  $m/z$  289.1046, found 289.1044.

#### IV. Table 1

**General Information:** All reactions were performed on a 0.40 mmol scale in 4 dram screw top vials unless otherwise indicated. The diastereomeric products were separated whenever possible, and reported ratios are based on crude  $^1\text{H}$  NMR analysis. The spectral data for the major isomers are reported.

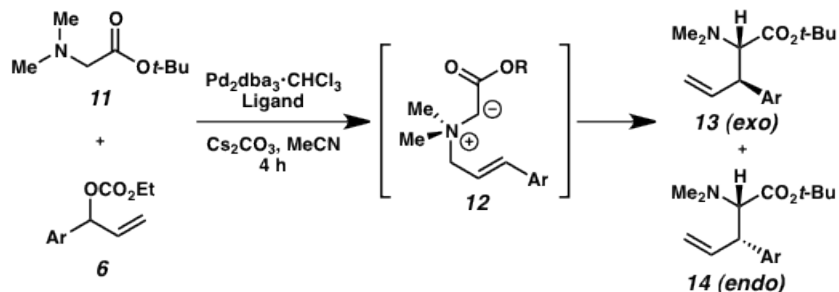

*The typical procedure for the [2,3]-Stevens rearrangement is as follows:* A vial fitted with a screw cap septum was charged with  $\text{Pd}_2\text{dba}_3 \cdot \text{CHCl}_3$  (4.1 mg, 4  $\mu\text{mol}$ ),  $\text{P}(2\text{-furyl})_3$  (5.2 mg, 20  $\mu\text{mol}$ ), and  $\text{Cs}_2\text{CO}_3$  (390 mg, 1.2 mmol). The reaction vial was placed under vacuum for several minutes and then back-filled with nitrogen. This purging procedure was repeated twice. The vial was sequentially charged with MeCN (2.0 mL), ethyl 1-arylallyl carbonate (0.40 mmol), and glycine ester (0.60 mmol). After stirring for 4-16 h at room temperature, the reaction was filtered through a Büchner funnel under vacuum filtration with EtOAc and then concentrated under reduced pressure. Purification on a Teledyne Isco CombiFlash® Rf provided the desired product.

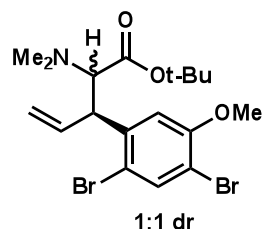

**Table 1, Entry 1:** Following the typical procedure for the [2,3]-Stevens rearrangement, purification (100% hexanes to 85:15 hexanes:EtOAc eluent, 12 min) provided the product as light yellow solid (160 mg, 0.34 mmol, 85%). **Diastereomer 1:**  $^1\text{H}$  NMR (400 MHz,  $\text{CDCl}_3$ )  $\delta$  7.71 (s, 1H), 6.70 (s, 1H), 5.74 (ddd,  $J = 17.0$  Hz,  $J = 10.2$  Hz,  $J = 7.9$  Hz, 1H), 5.14 (dt,  $J = 17.0$  Hz,  $J = 1.2$  Hz, 1H), 5.09 (d,  $J = 10.1$  Hz, 1H), 4.27 (dd,  $J = 11.7$  Hz,  $J = 8.1$ , 1H), 3.88 (s, 3H), 3.49 (d,  $J = 11.7$  Hz, 1H), 2.28 (s, 6H), 1.51 (s, 9H);  $^{13}\text{C}$  NMR (151 MHz,  $\text{CDCl}_3$ )  $\delta$  169.2, 155.3, 140.1, 136.5, 136.3, 117.8, 115.5, 112.0, 110.3, 81.6, 70.6, 56.3, 48.4, 41.3, 28.4; IR (film) 2976, 2935, 1723, 1473, 1366, 1247, 1147, 1055, 844, 697  $\text{cm}^{-1}$ ; HRMS (ESI-TOF) calc'd for  $[\text{C}_{18}\text{H}_{25}\text{Br}_2\text{NO}_3]^+ ([\text{M}+\text{H}]^+)$ :  $m/z$  462.0274, found 462.0277.

**Diastereomer 2:**  $^1\text{H}$  NMR (400 MHz,  $\text{CDCl}_3$ )  $\delta$  7.72 (s, 1H), 6.72 (s, 1H), 5.98 (ddd,  $J = 17.3$  Hz,  $J = 10.3$  Hz, 7.3 Hz, 1H), 5.12 (dt,  $J = 10.3$  Hz,  $J = 1.3$  Hz, 1H), 5.06 (dt,  $J = 17.2$  Hz,  $J = 1.4$  Hz, 1H), 4.27 (dd,  $J = 11.7$  Hz,  $J = 7.3$ , 1H), 3.88 (s, 3H), 3.51 (d,  $J = 11.7$  Hz, 1H), 2.46 (s, 6H), 1.19 (s, 9H);  $^{13}\text{C}$  NMR (151 MHz,  $\text{CDCl}_3$ )  $\delta$  168.4, 155.3, 140.2, 137.5, 136.3, 116.8, 116.0, 112.1, 110.4, 81.2, 71.9, 56.5, 47.2, 41.5, 27.9; IR (film) 2978, 2933, 1722, 1473, 1366, 1247, 1147, 1055, 922, 872, 697  $\text{cm}^{-1}$ ; HRMS (ESI-TOF) calc'd for  $[\text{C}_{18}\text{H}_{25}\text{Br}_2\text{NO}_3]^+ ([\text{M}+\text{H}]^+)$ :  $m/z$  462.0274, found 462.0277.

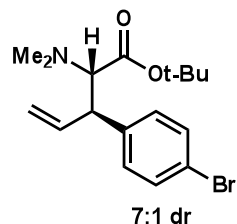

**Table 1, Entry 2.** Following the typical procedure for the [2,3]-Stevens rearrangement, purification by flash chromatography (9:1 to 8:2 hexanes:Et<sub>2</sub>O gradient eluent) provided the product as a white solid (126 mg, 0.35 mmol, 89%). **Major Diastereomer (13b):**  $^1\text{H}$  NMR (600 MHz,  $\text{CDCl}_3$ )  $\delta$  7.40 (d,  $J = 8.0$  Hz, 2H), 7.09 (d,  $J = 8.0$  Hz, 2H), 6.09-6.02 (m, 1H), 5.11 (d,  $J = 10.0$  Hz, 1H), 5.04 (d,  $J = 17.0$  Hz, 1H), 3.66 (dd,  $J = 12.0$  Hz,  $J = 9.0$  Hz, 1H), 3.39 (d,  $J = 12.0$  Hz, 1H), 2.41 (s, 6H), 1.19 (s, 9H);  $^{13}\text{C}$  NMR (151 MHz,  $\text{CDCl}_3$ )  $\delta$  160.0, 140.1, 138.9, 131.6, 130.5, 120.7, 116.4, 81.1, 72.2, 49.4, 41.4, 28.2; IR (film) 2977, 2936, 1722, 1367, 1488, 1257, 1147  $\text{cm}^{-1}$ ; HRMS (ESI-TOF) calc'd for  $[\text{C}_{17}\text{H}_{24}\text{BrNO}_2]^+ ([\text{M}+\text{H}]^+)$ :  $m/z$  354.1063, found 354.1073. The relative stereochemistry of the major diastereomer **13b** was determined by x-ray analysis of a single crystal (vide infra).

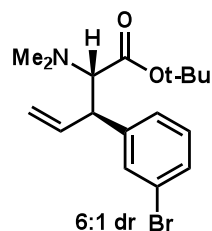

**Table 1, Entry 3:** Following the typical procedure for the [2,3]-Stevens rearrangement, purification (100% hexanes to 85:15 hexanes:EtOAc eluent, 12 min) provided the product as a light yellow solid (113 mg, 0.32 mmol, 80%). **Major Diastereomer (13c):**  $^1\text{H}$  NMR (400 MHz,  $\text{CDCl}_3$ )  $\delta$  7.40-7.36 (m, 1H), 7.36-7.31 (m, 1H), 7.18-7.14 (m, 2H), 6.07 (ddd,  $J = 17.1$  Hz,  $J = 10.2$  Hz,  $J = 8.3$  Hz, 1H), 5.15 (d,  $J = 10.2$  Hz, 1H), 5.09 (dt,  $J = 17.1$  Hz,  $J = 1.3$  Hz, 1H), 3.66 (dd,  $J = 11.8$  Hz,  $J = 8.2$  Hz, 1H), 3.42 (d,  $J = 11.8$  Hz, 1H), 2.43 (s, 6H), 1.21 (s, 9H);  $^{13}\text{C}$  NMR (100 MHz,  $\text{CDCl}_3$ )  $\delta$  168.8, 143.3, 138.5, 131.7, 129.9, 129.8, 127.2, 122.3, 116.5, 81.0, 71.9, 49.5, 41.2, 27.9; IR (film) 2977, 2935, 1722, 1475, 1367, 1258, 1146, 1073, 779, 698  $\text{cm}^{-1}$ ; HRMS (ESI-TOF) calc'd for  $[\text{C}_{17}\text{H}_{24}\text{BrNO}]^+ ([\text{M}+\text{H}]^+)$ :  $m/z$  354.1063, found 354.1067. The relative stereochemistry of the major diastereomer **13c** was determined by x-ray analysis of a single crystal (vide infra).

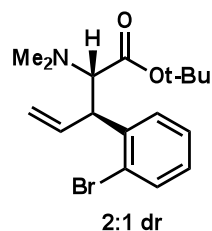

**Table 1, Entry 4:** Following the typical procedure for the [2,3]-Stevens rearrangement, purification (100% hexanes to 85:15 hexanes:EtOAc eluent, 12 min) provided the product as a light yellow solid (131 mg, 0.37 mmol, 93%). **Major Diastereomer (13d):**  $^1\text{H}$  NMR (400 MHz,  $\text{CDCl}_3$ )  $\delta$  7.50 (d,  $J = 8.4$  Hz, 2H), 7.32-7.18 (m, 1H), 7.07-7.02 (m, 1H), 5.98 (ddd,  $J = 17.5$  Hz,  $J = 10.4$  Hz,  $J = 7.7$  Hz, 1H), 5.13-5.06 (m, 2H), 4.36 (dd,  $J = 11.8$  Hz,  $J = 7.7$  Hz, 1H), 3.56 (d,  $J = 11.8$  Hz, 1H), 2.47 (s, 6H), 1.15 (s, 9H);  $^{13}\text{C}$  NMR (100 MHz,  $\text{CDCl}_3$ )  $\delta$  168.5, 139.8, 138.1, 133.1, 128.9, 128.0, 125.5, 127.56, 116.4, 80.9, 71.9, 47.2, 41.4, 27.8; IR (film) 2978, 2936, 1724, 1471, 1367, 1257, 1147, 1022, 920, 753  $\text{cm}^{-1}$ ; HRMS (ESI-TOF) calc'd for  $[\text{C}_{17}\text{H}_{24}\text{BrNO}]^+ ([\text{M}+\text{H}]^+)$ :  $m/z$  354.1063, found 354.1053.

**Minor Diastereomer (14d):**  $^1\text{H}$  NMR (400 MHz,  $\text{CDCl}_3$ )  $\delta$  7.54 (d,  $J = 8.0$  Hz, 2H), 7.28-7.19 (m, 1H), 7.08-7.03 (m, 1H), 5.75 (ddd,  $J = 17.6$  Hz,  $J = 10.1$  Hz,  $J = 7.6$  Hz, 1H), 5.16-5.04 (m, 2H), 4.35 (m, 1H), 3.56 (d,  $J = 13.5$  Hz, 1H), 2.04 (s, 6H), 1.49 (s, 9H). The relative stereochemistry of the minor diastereomer **14d** was determined by x-ray analysis of a single crystal (vide infra).

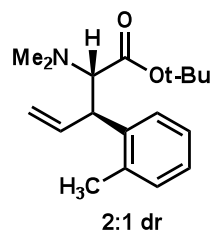

**Table 1, Entry 5:** Following the typical procedure for the [2,3]-Stevens rearrangement, purification (100% hexanes to 85:15 hexanes:EtOAc eluent, 12 min) provided the product as a clear oil (90 mg, 0.31 mmol, 78%). **Major Diastereomer (13e):**  $^1\text{H}$  NMR (400 MHz,  $\text{CDCl}_3$ )  $\delta$  7.23-7.04 (m, 4H), 6.03 (ddd,  $J = 17.0$  Hz,  $J = 10.2$  Hz,  $J = 7.9$  Hz, 1H), 5.08, (d,  $J = 10.2$  Hz, 1H), 5.02 (d,  $J = 17.2$  Hz, 1H), 4.01 (dd,  $J = 11.8$  Hz,  $J = 8.0$  Hz, Hz, 1H), 3.57 (d,  $J = 11.8$  Hz, 1H), 2.47 (s, 6H), 2.39 (s, 3H), 1.12 (s, 9H);  $^{13}\text{C}$  NMR (100 MHz,  $\text{CDCl}_3$ )  $\delta$  169.2, 139.2, 138.7, 136.4, 130.4, 127.2, 126.4, 125.9, 115.5, 80.5, 71.9, 44.2, 41.3, 27.8, 19.8; IR (film) 2936, 1722, 1454, 1367, 1257, 1221, 1037, 917, 844, 754  $\text{cm}^{-1}$ ; HRMS (ESI-TOF) calc'd for  $[\text{C}_{18}\text{H}_{27}\text{NO}_2]^+ ([\text{M}+\text{H}]^+)$ :  $m/z$  290.2114, found 290.2123.

**Minor Diastereomer (14e):**  $^1\text{H}$  NMR (400 MHz,  $\text{CDCl}_3$ )  $\delta$  7.23-7.06 (m, 4H), 5.73 (ddd,  $J = 17.0$ ,  $J = 10.1$ ,  $J = 8.2$  Hz, 1H), 5.07-4.95 (m, 2H), 3.97 (dd,  $J = 11.3$ ,  $J = 8.3$  Hz, 1H), 3.58 (d,  $J = 11.3$  Hz, 1H), 2.37 (s, 3H), 2.26 (s, 6H), 1.50 (s, 9H). The relative stereochemistry of the minor diastereomer **14e** was determined by x-ray analysis of a single crystal (vide infra).

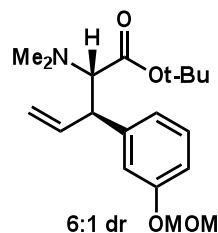

**Table 1, Entry 6:** Following the typical procedure for the [2,3]-Stevens rearrangement, purification (100% hexanes to 8:2 hexanes:EtOAc eluent, 12 min) provided the product as a clear oil (117 mg, 0.35 mmol, 87%). **Major Diastereomer (13f):**  $^1\text{H}$  NMR (400 MHz,  $\text{CDCl}_3$ )  $\delta$  7.18 (t,  $J = 7.6$  Hz, 1H), 6.93-6.82 (m, 3H), 6.07 (ddd,  $J = 16.6$  Hz,  $J = 10.6$  Hz,  $J = 8.5$  Hz, 1H), 5.16-5.12 (m, 1H), 5.15 (s, 2H), 5.11 – 5.07 (m, 1H), 3.66 (dd,  $J = 11.7$  Hz,  $J = 8.6$  Hz, 1H), 3.51 – 3.40 (m, 4H), 2.43 (s, 6H), 1.18 (s, 9H);  $^{13}\text{C}$  NMR (151 MHz,  $\text{CDCl}_3$ )  $\delta$  169.0, 157.2, 142.4, 139.0, 129.3, 122.0, 116.7, 115.9, 114.3, 94.3, 80.7, 72.0, 55.9, 49.9, 41.2, 27.9; IR (film) 2977, 2936, 1722, 1599, 1487, 1454, 1367, 1257, 1150, 1080, 1020, 922, 789, 701  $\text{cm}^{-1}$ ; HRMS (ESI-TOF) calc'd for  $[\text{C}_{19}\text{H}_{29}\text{NO}_4]^+ ([\text{M}+\text{H}]^+)$ :  $m/z$  336.2169, found 336.2159.



## V. Scheme 2 Compounds

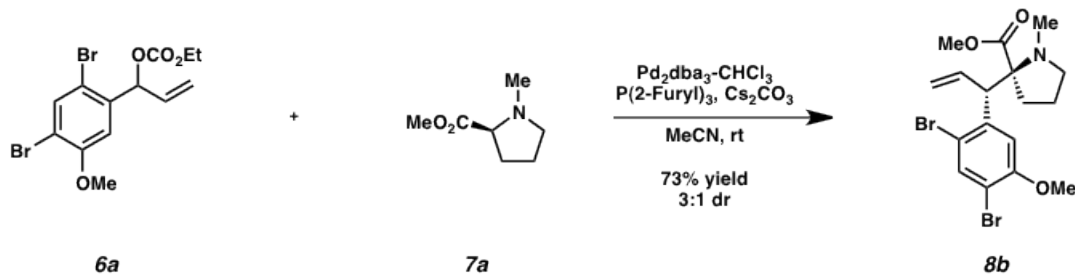

**Compound 8b:** Following the typical procedure for the [2,3]-Stevens rearrangement, purification (100% hexanes to 85:15 hexanes:EtOAc eluent, 12 min) provided the product as light yellow solid (770 mg, 1.72 mmol, 78%):  $^1\text{H}$  NMR (400 MHz,  $\text{CDCl}_3$ )  $\delta$  7.72 (s, 1H), 7.08 (s, 1H), 6.10 (ddd,  $J = 17.4$  Hz,  $J = 10.3$  Hz,  $J = 7.5$  Hz, 1H), 5.10 (d,  $J = 10.3$ , 1H), 5.04 (d,  $J = 17.1$  Hz, 1H), 4.62 (d,  $J = 7.5$  Hz, 1H), 3.85 (s, 3H), 3.76 (s, 3H), 2.97 (t,  $J = 7.6$  Hz, 1H), 2.59 (q,  $J = 9.3$  Hz, 1H), 2.39–2.29 (m, 1H), 2.28 (s, 3H), 2.12 (ddd,  $J = 13.6$  Hz,  $J = 9.8$  Hz,  $J = 3.8$  Hz, 1H), 1.86–1.61 (m, 2H);  $^{13}\text{C}$  NMR (151 MHz,  $\text{CDCl}_3$ )  $\delta$  173.5, 154.7, 140.7, 137.9, 136.0, 117.4, 117.0, 113.4, 110.1, 74.1, 56.2, 55.6, 52.1, 51.2, 37.3, 33.1, 22.5; IR (film) 2948, 2844, 1722, 1581, 1471, 1365, 1248, 1215, 1190, 1056, 999, 920, 874, 698  $\text{cm}^{-1}$ ; HRMS (ESI-TOF) calc'd for  $[\text{C}_{17}\text{H}_{21}\text{Br}_2\text{NO}_3]^+([\text{M}+\text{H}]^+)$ :  $m/z$  445.9961, found 445.9965. The relative stereochemistry of the major diastereomer **8b** was determined by x-ray analysis of a single crystal (vide infra).

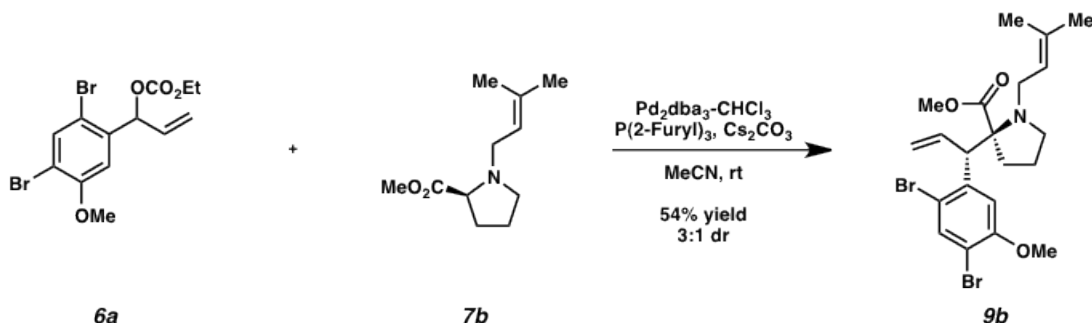

**Compound 9b:** Following the typical procedure for the [2,3]-Stevens rearrangement, purification (100% hexanes to 8:2 hexanes:EtOAc eluent, 12 min) provided the product as light yellow solid (280 mg, 0.56 mmol, 56%):  $^1\text{H}$  NMR (400 MHz,  $\text{CDCl}_3$ )  $\delta$  7.72 (s, 1H), 7.09 (s, 1H), 6.16–6.04 (m, 1H), 5.09 (dt,  $J = 10.2$  Hz,  $J = 1.4$  Hz, 1H), 5.03 (dt,  $J = 17.0$  Hz,  $J = 1.5$  Hz, 1H), 4.90 (t,  $J = 6.9$  Hz, 1H), 4.65 (d,  $J = 7.5$  Hz, 1H), 3.85 (s, 3H), 3.77 (s, 3H), 3.30 (dd,  $J = 13.6$  Hz,  $J = 5.6$  Hz, 1H), 3.05 (t,  $J = 9.4$  Hz, 1H), 2.75 (dd,  $J = 13.3$  Hz,  $J = 8.5$  Hz, 1H), 2.45 (q,  $J = 9.2$  Hz, 1H), 2.37–2.24 (m, 1H), 2.18–2.02 (m, 1H), 1.87–1.65 (m, 2H), 1.64 (s, 3H), 1.53 (s, 3H);  $^{13}\text{C}$  NMR (151 MHz,  $\text{CDCl}_3$ )  $\delta$  173.9, 154.7, 140.7, 137.8, 136.0, 133.4, 122.5, 117.4, 117.1, 113.6, 110.0, 73.9, 56.3, 52.4, 52.1, 51.3, 47.8, 33.0, 25.8, 22.3, 17.8; IR (film) 2968, 2948, 1721, 1473, 1365, 1248, 1212, 1152, 1057, 920, 872  $\text{cm}^{-1}$ ; HRMS (ESI-TOF) calc'd for  $[\text{C}_{21}\text{H}_{27}\text{Br}_2\text{NO}_3]^+([\text{M}+\text{H}]^+)$ :  $m/z$  500.0430, found 500.0429. The relative stereochemistry of the major diastereomer **9b** was determined by converting it to **S1** (vide infra).

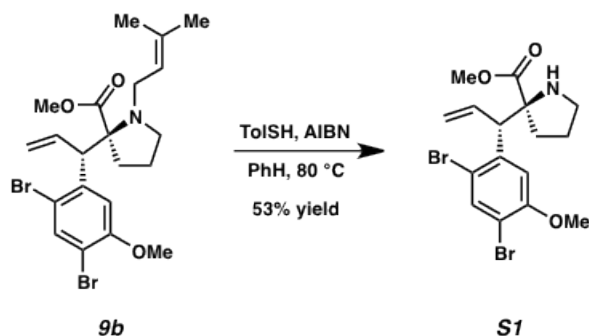

**Compound S1:** Our procedure was modified from a method reported in the literature for the cleavage of N-prenyl groups<sup>4</sup>. In a round-bottom flask, a solution of compound **9b** (120 mg, 0.30 mmol) in degassed benzene (3.0 mL) was sequentially charged with 4-methylbenzenethiol (56 mg, 0.45 mmol) and AIBN (10 mg, 0.06 mmol). The solution was heated to reflux for 14 h then cooled to room temperature and quenched with 1N HCl (10 mL). The aqueous layer was washed with Et<sub>2</sub>O (30 mL) and then basified using Na<sub>2</sub>CO<sub>3</sub>. The aqueous layer was extracted with EtOAc (3 x 30 mL), washed with brine, dried over MgSO<sub>4</sub>, and concentrated under reduced pressure. Purification by CombiFlash Rf (100% hexanes to 7:3 hexanes:EtOAc eluent, 14 min) provided the product as a single diastereomer (55 mg, 0.16 mmol, 53%). <sup>1</sup>H NMR (400 MHz, CDCl<sub>3</sub>) δ 7.64 (s, 1H), 7.57 (s, 1H), 6.05 (ddd, *J* = 17.1, *J* = 10.1, *J* = 9.1 Hz, 1H), 5.22 (dd, *J* = 17.1, *J* = 1.8, Hz, 1H), 5.17 (dd, *J* = 10.1, *J* = 1.8 Hz, 1H), 4.23 (d, *J* = 9.1 Hz, 1H), 3.87 (s, 3H), 3.52 (s, 3H), 3.14-3.06 (m, 1H), 2.88-2.80 (m, 1H), 2.25-2.27 (m, 1H), 2.13-2.04 (m, 1H), 1.83-1.73 (m, 1H), 1.58-1.45 (m, 1H). <sup>13</sup>C NMR (151 MHz, CDCl<sub>3</sub>) δ 172.1, 150.4, 136.3, 131.9, 131.1, 113.7, 109.9, 107.9, 105.6, 67.5, 51.7, 49.2, 47.6, 43.9, 31.4, 21.3. IR (film) 2949, 1729, 1471, 1365, 1249, 1129, 1053. HRMS (ESI-TOF) calc'd for [C<sub>16</sub>H<sub>19</sub>Br<sub>2</sub>NO<sub>3</sub>]<sup>+</sup>([M+H]<sup>+</sup>): *m/z* 431.9804, found 431.9807. The relative stereochemistry of **S1** was determined by x-ray analysis of a single crystal (vide infra).

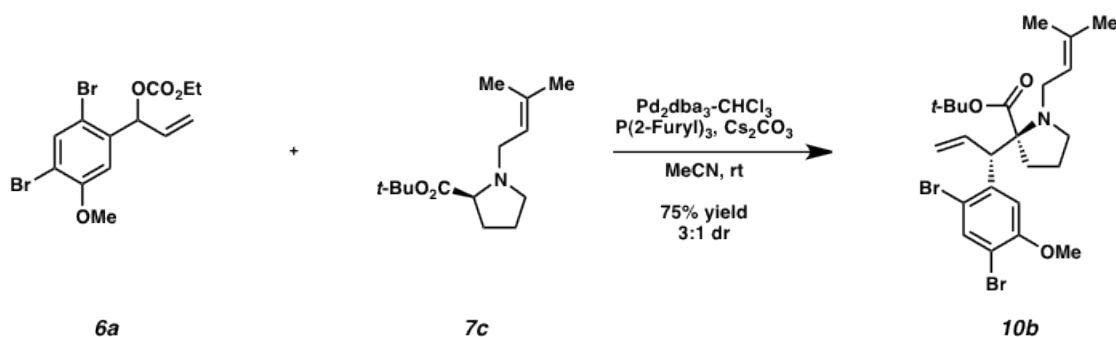

**Compound 10b:** Following the typical procedure for the [2,3]-Stevens rearrangement, purification (100% hexanes to 8:1 hexanes:EtOAc eluent, 12 min) provided the product as light yellow solid (160 mg, 0.30 mmol, 75%): <sup>1</sup>H NMR (400 MHz, CDCl<sub>3</sub>) δ 7.70 (s, 1H), 7.10 (s, 1H), 6.14-6.01 (m, 1H), 5.06 (dt, *J* = 10.3, *J* = 1.4 Hz, 1H), 4.99 (dt, *J* = 17.1, *J* = 1.5 Hz, 1H), 4.82 (t, *J* = 8.4 Hz, 1H), 4.65 (dd, *J* = 7.5, *J* = 1.2 Hz, 1H), 3.83 (s, 3H), 3.33 (dd, *J* = 13.4, *J* = 3.0 Hz, 1H), 3.16-3.01 (m, 2H), 2.84 (dd, *J* = 13.4, *J* = 8.6 Hz, 1H), 2.52-2.41 (m, 1H), 2.31-2.22 (m, 1H), 2.13-2.02 (m, 1H), 1.85-1.75 (m, 1H), 1.62 (s, 3H), 1.52 (s, 12H); <sup>13</sup>C NMR (151 MHz, CDCl<sub>3</sub>) δ 172.3, 154.6, 140.8, 138.0, 135.9, 133.1, 122.9, 117.2, 117.0, 113.8, 109.9, 81.4, 74.1,

<sup>4</sup> Escoubet, S.; Gastaldi, S.; Timokhin, V. I.; Bertrand, M. P.; Siri, D. *J. Am. Chem. Soc.* **2004**, *126*, 12343-12352.

56.3, 52.3, 52.1, 47.6, 32.8, 28.4, 25.8, 22.2, 17.8; IR (film) 2973, 1714, 1472, 1367, 1249, 1153, 1057, 917, 849; HRMS (ESI-TOF) calc'd for  $[C_{24}H_{34}Br_2NO_3]^+([M+H]^+)$ :  $m/z$  542.0827, found 542.0904. The relative stereochemistry of the major diastereomer **10b** was determined by converting it to **9b** (vide infra).

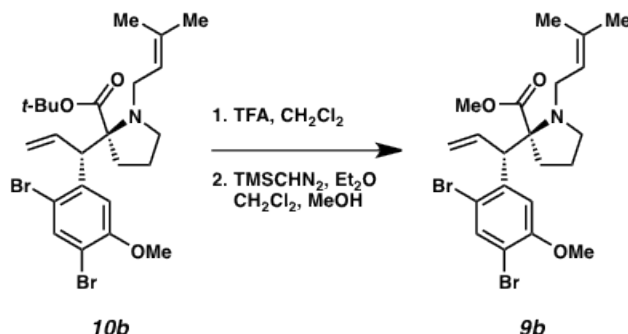

**Compound 9b:** In a round-bottom flask, a solution of compound **10b** (46 mg, 0.09 mmol) in  $CH_2Cl_2$  (0.5 mL) and trifluoroacetic acid (0.5 mL) was stirred for 3 h at room temperature. The solution was concentrated under reduced pressure and placed under high vacuum for 1 h. The crude mixture was dissolved in a  $CH_2Cl_2$  (0.5 mL) and MeOH (0.5 mL) and treated with TMSCHN<sub>2</sub> (0.2 mL, 0.40 mmol, 2.0 M Et<sub>2</sub>O) dropwise. The reaction was stirred for 30 min and then quenched with saturated aqueous NaHCO<sub>3</sub> (10 mL). The mixture was extracted with EtOAc (3 x 20 mL), washed with brine, dried over MgSO<sub>4</sub>, and concentrated under reduced pressure. Purification by CombiFlash Rf (100% hexanes to 8:1/Hex:EtOAc) provided compound **9b** as a single diastereomer.

## VI. Scheme 3 Compounds

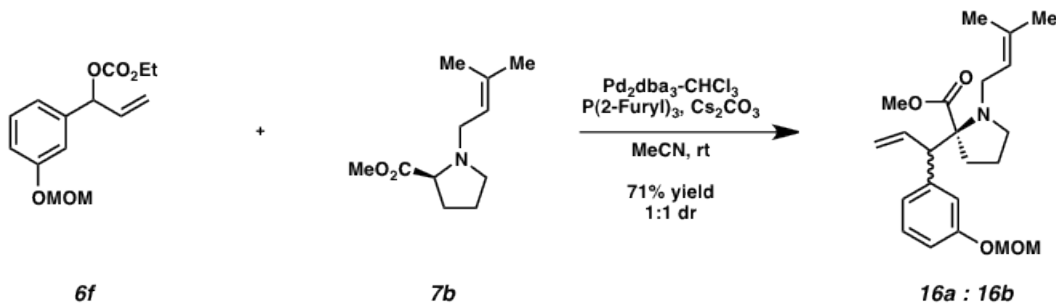

**Compound 16a/16b:** Following the typical procedure for the [2,3]-Stevens rearrangement, purification (100% hexanes to 8:2 hexanes:EtOAc eluent, 12 min) provided the product as inseparable 1:1 mixture of diastereomers (210 mg, 0.56 mmol, 56%): <sup>1</sup>H NMR (400 MHz, CDCl<sub>3</sub>) δ 7.16 (q,  $J$  = 8.2 Hz, 1H), 6.97-6.85 (m, 3H), 6.26 (ddd,  $J$  = 17.1 Hz,  $J$  = 10.3 Hz,  $J$  = 7.8 Hz, 0.5H), 6.18-6.04 (m, 0.5H), 5.26-5.07 (m, 4.5H), 5.04 (dt,  $J$  = 17.1, 1.6 Hz, 0.5H), 4.10 (d,  $J$  = 7.8 Hz, 0.5H), 4.05 (d,  $J$  = 9.0 Hz, 0.5H), 3.70 (s, 1.5H), 3.60 (s, 1.5H), 3.51-3.41 (m, 1H), 3.47 (s, 1.5H), 3.46 (s, 1.5H), 3.19 (td,  $J$  = 8.8 Hz,  $J$  = 2.8 Hz, 0.5H), 2.97 (td,  $J$  = 8.6 Hz,  $J$  = 2.2 Hz, 0.5H), 2.87-2.78 (m, 1H), 2.34-2.18 (m, 1.5H), 2.12-1.92 (m, 1.5H), 1.79-1.67 (m, 1.5H), 1.72 (s, 1.5H), 1.67 (s, 1.5H), 1.65 (s, 1.5H), 1.61 (s, 1.5H), 1.45-1.32 (m, 0.5H); <sup>13</sup>C NMR (151 MHz, CDCl<sub>3</sub>) δ 173.1, 172.3, 156.9, 156.6, 142.3, 141.9, 137.5, 137.1, 133.6, 133.0, 128.9, 128.4, 125.4, 123.5, 123.1, 123.0, 122.7, 118.3, 117.7, 117.1, 114.3, 114.0, 94.5, 74.0,

55.9, 51.8, 51.4, 51.2, 51.1, 50.8, 50.7, 47.5, 46.8, 30.7, 30.3, 25.9, 25.8, 21.4, 21.1, 18.0, 17.9; IR (film) 2950, 1723, 1600, 1489, 1449, 1240, 1152, 1080, 1019, 922, 786, 701  $\text{cm}^{-1}$ ; HRMS (ESI-TOF) calc'd for  $[\text{C}_{22}\text{H}_{31}\text{NO}_4]^+([\text{M}+\text{H}]^+)$ :  $m/z$  374.2326, found 374.2329.

## VII. Formal Total Synthesis of (±)-Amathaspiramide F

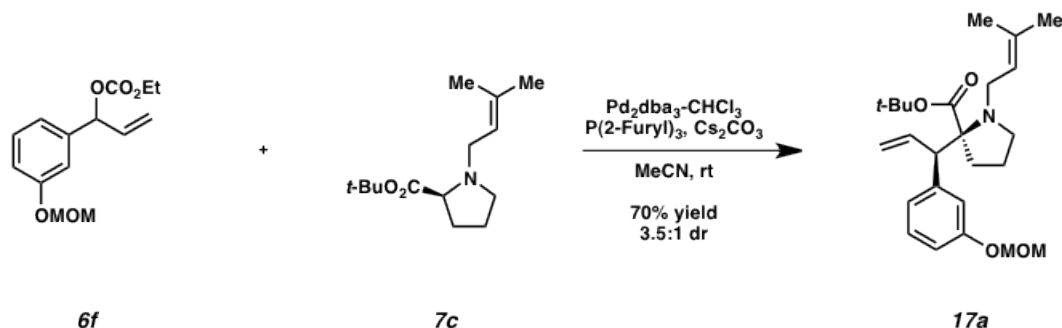

**Compound 17a:** Following the typical procedure for the [2,3]-Stevens rearrangement, purification (100% hexanes to 8:2 hexanes:EtOAc eluent, 12 min) provided the product as an inseparable 3.5:1 mixture of diastereomers (730 mg, 1.75 mmol, 70%):  $^1\text{H}$  NMR (400 MHz,  $\text{CDCl}_3$ )  $\delta$  7.21–7.10 (m, 1H), 7.01–6.83 (m, 3H), 6.25 (ddd,  $J = 17.4$  Hz,  $J = 10.4$  Hz,  $J = 7.3$  Hz, 1H), 5.24 (t,  $J = 7.1$  Hz, 1H), 5.20–5.07 (m, 3H), 4.96 (dt,  $J = 17.2$  Hz,  $J = 1.6$  Hz, 1H), 4.04 (d,  $J = 7.3$  Hz, 1H), 3.56–3.49 (m, 2H), 3.45 (s, 3H), 3.19 (td,  $J = 8.7$  Hz,  $J = 2.5$  Hz, 1H), 3.04–2.87 (m, 1H), 2.33 (q,  $J = 8.6$  Hz, 1H), 2.29–2.10 (m, 1H), 2.04–1.86 (m, 1H), 1.82–1.72 (m, 1H), 1.73 (s, 3H), 1.66 (s, 3H), 1.34 (s, 9H);  $^{13}\text{C}$  NMR (151 MHz,  $\text{CDCl}_3$ )  $\delta$  170.7, 156.9, 142.5, 137.7, 133.4, 128.7, 123.3, 123.1, 118.1, 116.8, 113.9, 94.4, 80.8, 73.9, 55.9, 51.1, 51.0, 46.8, 30.6, 28.2, 25.9, 21.3, 17.9; IR (film) 2973, 1714, 1600, 1489, 1452, 1367, 1245, 1153, 1081, 1021, 922, 859, 773  $\text{cm}^{-1}$ ; HRMS (ESI-TOF) calc'd for  $[\text{C}_{25}\text{H}_{37}\text{NO}_4]^+([\text{M}+\text{H}]^+)$ :  $m/z$  416.2795, found 416.2798.

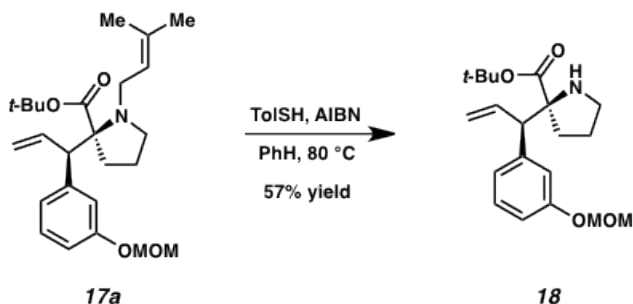

**Compound 18:** Our procedure was modified from a method reported in the literature for the cleavage of N-prenyl groups<sup>4</sup>. In a round-bottom flask, a solution of compound **17a** (720 mg, 1.73 mmol) in degassed benzene (17 mL) was sequentially charged with 4-methylbenzenethiol (320 mg, 2.6 mmol) and then AIBN (57 mg, 0.35 mmol). The solution was heated to reflux for 3 h then cooled to room temperature and quenched with 1N HCl (20 mL). The aqueous layer was washed with  $\text{Et}_2\text{O}$  (30 mL) then basified using  $\text{Na}_2\text{CO}_3$ . The aqueous layer was extracted with EtOAc (3 x 75 mL), washed with brine, dried over  $\text{MgSO}_4$ , and concentrated under reduced pressure. Purification by CombiFlash Rf (100% hexanes to 7:3 hexanes:EtOAc eluent, 14 min) provided the product as a single diastereomer (340 mg, 1.0 mmol, 57%):  $^1\text{H}$  NMR (400 MHz,

CDCl<sub>3</sub>)  $\delta$  7.19 (d,  $J$  = 7.9 Hz, 1H), 7.17–7.13 (m, 1H), 7.05 (dt,  $J$  = 7.7, 1.2 Hz, 1H), 6.91 (ddd,  $J$  = 8.2 Hz,  $J$  = 2.6 Hz,  $J$  = 1.0 Hz, 1H), 6.22 (ddd,  $J$  = 16.7 Hz,  $J$  = 10.5,  $J$  = 9.2 Hz, 1H), 5.17 (s, 2H), 5.10–4.98 (m, 2H), 3.62 (d,  $J$  = 9.2 Hz, 1H), 3.48 (s, 3H), 2.96–2.88 (m, 1H), 2.77–2.70 (m, 1H), 2.63 (s, 1H), 2.08–1.92 (m, 1H), 1.72 (dt,  $J$  = 13.0 Hz,  $J$  = 7.9 Hz, 1H), 1.51–1.39 (m, 1H), 1.44 (s, 9H), 1.35–1.25 (m, 1H); <sup>13</sup>C NMR (151 MHz, CDCl<sub>3</sub>)  $\delta$  175.8, 156.8, 142.3, 138.5, 138.5, 128.7, 123.5, 117.9, 116.3, 116.3, 114.3, 94.5, 81.1, 73.1, 56.9, 56.9, 55.9, 55.9, 46.7, 34.2, 27.9, 25.0; IR (film) 3350, 2957, 1721, 1583, 1487, 1452, 1368, 1249, 1154, 1080, 1021, 922, 849, 782, 702 cm<sup>-1</sup>; HRMS (ESI-TOF) calc'd for [C<sub>20</sub>H<sub>29</sub>NO<sub>4</sub>]<sup>+</sup>([M+H]<sup>+</sup>):  $m/z$  348.2169, found 348.2167.

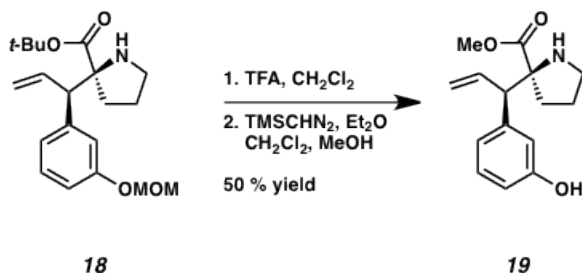

**Compound 19:** In a round-bottom flask, a solution of compound **18** (70 mg, 0.20 mmol) in CH<sub>2</sub>Cl<sub>2</sub> (2.0 mL) and trifluoroacetic acid (2.0 mL) was stirred for 19 h at room temperature. The solution was concentrated under reduced pressure and placed under high vacuum for 1 h. The crude mixture was dissolved in a CH<sub>2</sub>Cl<sub>2</sub> (2.0 mL) and MeOH (2.0 mL) and treated with TMSCHN<sub>2</sub> (0.4 mL, 0.80 mmol, 2.0 M Et<sub>2</sub>O) dropwise. The reaction was stirred for 7 h and then quenched with NaHCO<sub>3</sub> (20 mL). The mixture was extracted with EtOAc (3 x 25 mL), washed with brine, dried over MgSO<sub>4</sub>, and concentrated under reduced pressure. Purification by CombiFlash Rf (100% hexanes to 100% EtOAc (1% TEA) eluent, 16 min) provided the product as a single diastereomer (26 mg, 0.10 mmol, 50%): <sup>1</sup>H NMR (400 MHz, CDCl<sub>3</sub>)  $\delta$  7.15 (t,  $J$  = 7.8 Hz, 1H), 6.91–6.89 (m, 1H), 6.84 (d,  $J$  = 7.8 Hz, 1H), 6.72 (ddd,  $J$  = 7.8 Hz,  $J$  = 2.7 Hz,  $J$  = 1.0 Hz, 1H), 6.24 (ddd,  $J$  = 16.6 Hz,  $J$  = 10.6 Hz,  $J$  = 9.3 Hz, 1H), 5.10–5.03 (m, 2H), 3.70 (s, 3H), 3.61 (d,  $J$  = 9.5 Hz, 1H), 2.95–2.87 (m, 1H), 2.85–2.78 (m, 1H), 2.17–2.02 (m, 1H), 1.90–1.74 (m, 1H), 1.60–1.38 (m, 2H); <sup>13</sup>C NMR (151 MHz, CDCl<sub>3</sub>)  $\delta$  176.8, 155.8, 141.8, 137.9, 129.2, 121.4, 116.7, 116.3, 114.1, 73.6, 57.3, 52.3, 46.3, 33.9, 24.6; IR (film) 3347 (broad), 2952, 1729, 1587, 1455, 1223, 997, 921, 783, 704 cm<sup>-1</sup>; HRMS (ESI-TOF) calc'd for [C<sub>15</sub>H<sub>19</sub>NO<sub>3</sub>]<sup>+</sup>([M+H]<sup>+</sup>):  $m/z$  262.1438, found 262.1443.

## Comparison Spectra for Compound 19

| $\delta_H$ (synthesized)<br>(400 MHz, CDCl <sub>3</sub> ) | $\delta_H$ (reported) <sup>5</sup><br>(400 MHz, CDCl <sub>3</sub> ) |
|-----------------------------------------------------------|---------------------------------------------------------------------|
| 7.15                                                      | 7.13                                                                |
| 6.91-6.89                                                 | 6.92                                                                |
| 6.84                                                      | 6.82                                                                |
| 6.72                                                      | 6.71                                                                |
| 6.24                                                      | 6.23                                                                |
| 5.10-5.03                                                 | 5.08-5.03                                                           |
|                                                           | 3.80-4.10                                                           |
| 3.70                                                      | 3.69                                                                |
| 3.61                                                      | 3.63                                                                |
| 2.85-2.78, 2.95-2.88                                      | 2.93-2.83                                                           |
| 2.17-2.02                                                 | 2.08                                                                |
| 1.90-1.74                                                 | 1.82                                                                |
| 1.60-1.38                                                 | 1.54-1.44                                                           |

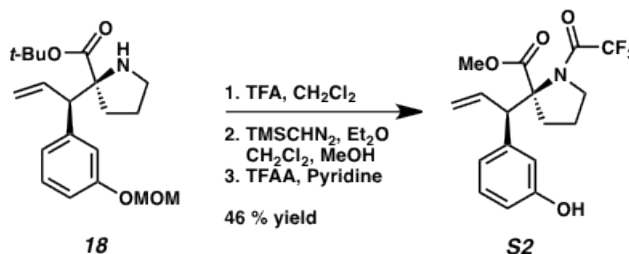

**Compound S2:** In a round bottom flask, a solution of compound **18** (0.51 g, 1.50 mmol) in dichloromethane (15 ml) and trifluoroacetic acid (2.0 mL) was stirred for 19 h at room temperature. The solution was concentrated under reduced pressure and placed under high vacuum for 1 h. The crude mixture was dissolved in a CH<sub>2</sub>Cl<sub>2</sub> (15.0 mL) and MeOH (15.0 mL) and treated with TMSCHN<sub>2</sub> (3.3 mL, 6.7 mmol, 2.0 M Et<sub>2</sub>O) dropwise. The reaction was stirred for 4 h and then quenched with NaHCO<sub>3</sub> (50 mL). The mixture was extracted with EtOAc (3 x 50 mL), washed with brine, dried over MgSO<sub>4</sub>, and concentrated under reduced pressure. The crude mixture was dissolved in pyridine (8.0 ml) and treated with trifluoroacetic anhydride (0.62 ml, 4.5 mmol) at 0° C dropwise. The reaction was allowed to stir at room temperature for 1.5 hrs then quenched with NaHCO<sub>3</sub> (40 mL). The mixture was extracted with EtOAc (3 x 50 mL), washed with brine, dried over MgSO<sub>4</sub>, and concentrated under reduced pressure. Purification by CombiFlash Rf (100% hexanes to 97:3 hexanes:EtOAc eluent, 14 min) provided the product as a single diastereomer (0.25 g, 0.70 mmol, 46%): <sup>1</sup>H NMR (400 MHz, CDCl<sub>3</sub>)  $\delta$  7.15 (t, *J* = 7.9 Hz, 1H), 6.96 (q, *J* = 2.3 Hz, 1H), 6.88 (d, *J* = 7.8 Hz, 1H), 6.75 (dd, *J* = 8.1 Hz, *J* = 2.5 Hz, 1H), 6.14 (dt, *J* = 17.3 Hz, *J* = 9.5 Hz, 1H), 5.15- 4.98 (m, 2H), 4.58 (dd, *J* = 9.5 Hz, *J* = 2.5 Hz, 1H), 4.02- 3.85 (m, 1H), 3.66 (s, 3H), 3.6- 3.46 (m, 1H), 2.52- 2.31 (m, 1H), 2.16-1.89 (m, 2H), 1.90-1.71 (m, 1H); <sup>13</sup>C NMR (151 MHz, CDCl<sub>3</sub>)  $\delta$  171.8, 155.9, 141.2, 136.0, 129.2, 121.7, 120.5, 117.9, 117.4, 114.2, 73.7, 52.7, 52.6, 52.3, 49.2, 34.0, 24.1; IR (film) 3417 (broad), 1747, 1693,

<sup>5</sup> Sakaguchi, K.; Ayabe, M.; Watanabe, Y.; Takuya Okada; Kawamura, K.; Shiada, T.; Ohfun, Y. *Org. Lett.* **2008**, *10*, 5449-5452.

1599, 1455, 1229, 1150, 999, 927, 758; LCMS (ESI) calc'd for  $[\text{C}_{17}\text{H}_{18}\text{F}_3\text{NO}_4]^+([\text{M}+\text{H}]^+)$ :  $m/z$  358.12, found 358.1. The relative stereochemistry of **S2** was determined by x-ray analysis of a single crystal (vide infra).

### VIII. Determination of Relative Stereochemistry of Products

*We thank Dr. Vincent Lynch (Manager of the X-ray Diffraction Lab at UT Austin) for all the X-ray structural analysis.*

A sample of **8b** was recrystallized from hexanes (slow evaporation). The resulting crystals were suitable for X-ray diffraction and the structure was solved. This structure allowed the assignment of relative configuration as shown.

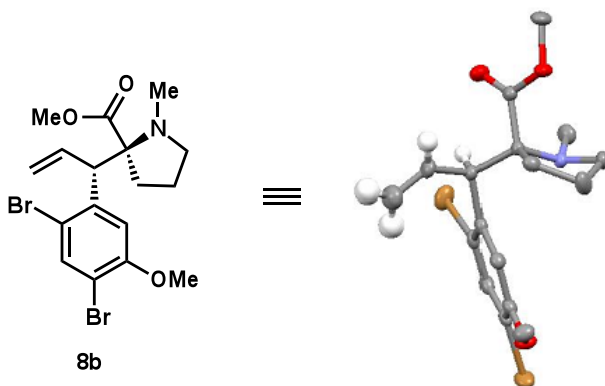

A sample of **S1** was recrystallized from hexanes (slow evaporation). The resulting crystals were suitable for X-ray diffraction and the structure was solved. This structure allowed the assignment of relative configuration of **S1**, **9b**, and **10b**, as shown.

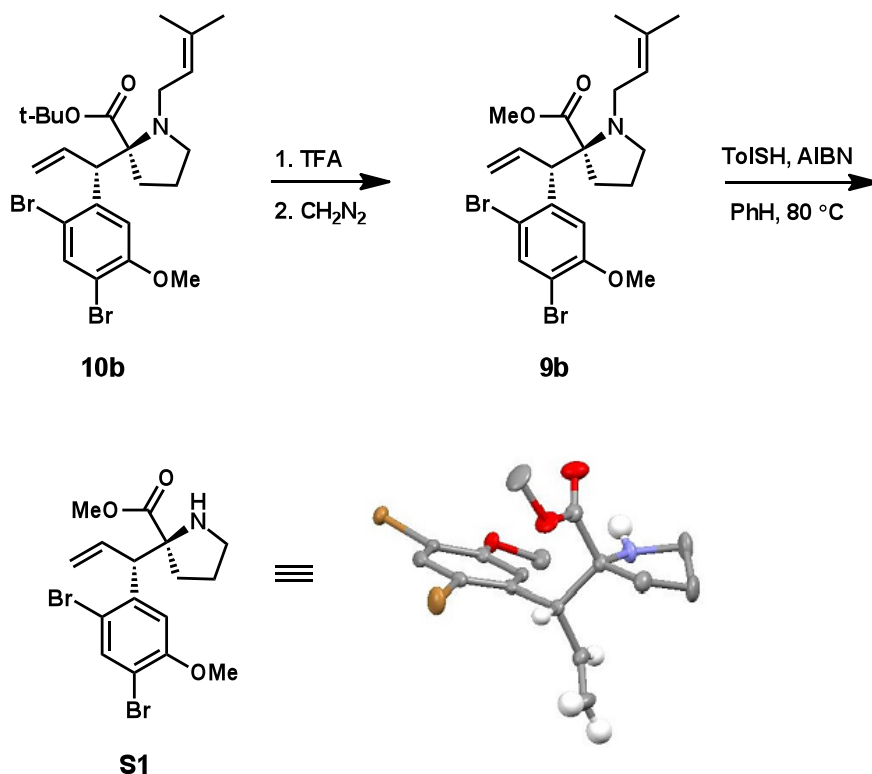



**Table 1, Entry 2:** A sample of compound **13b** was recrystallized from hexanes (slow evaporation). The resulting crystals were suitable for X-ray diffraction and the structure was solved. This structure allowed the assignment of relative configuration as shown.

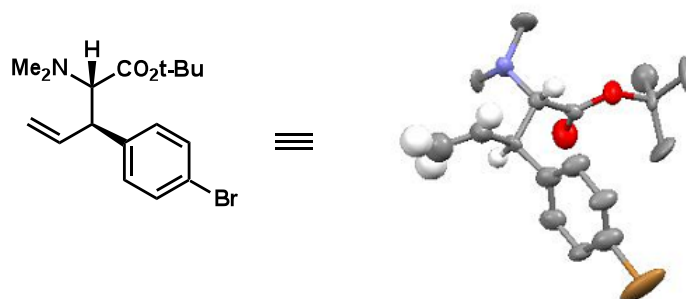

**Table 1, Entry 3:** A sample of compound **13c** was recrystallized from hexanes (slow evaporation). The resulting crystals were suitable for X-ray diffraction and the structure was solved. This structure allowed the assignment of relative configuration as shown.

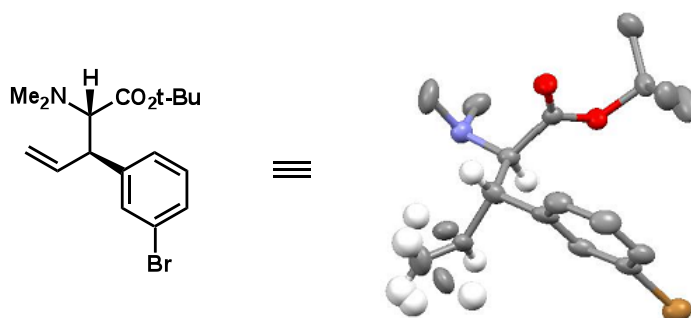

**Table 1, Entry 4:** A sample of compound **14d** was recrystallized from hexanes (slow evaporation). The resulting crystals were suitable for X-ray diffraction and the structure was solved. This structure allowed the assignment of relative configuration as shown.

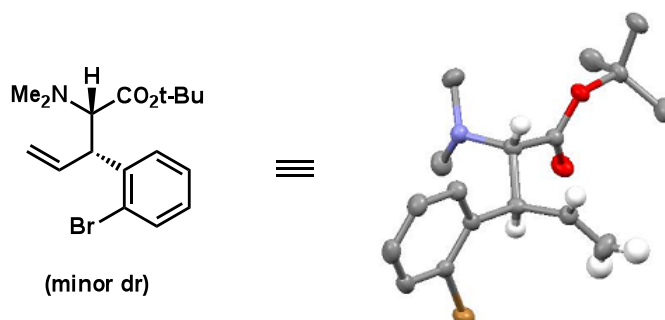

**Table 1, Entry 5:** A sample of compound **14e** was recrystallized from hexanes (slow evaporation). The resulting crystals were suitable for X-ray diffraction and the structure was solved. This structure allowed the assignment of relative configuration as shown.

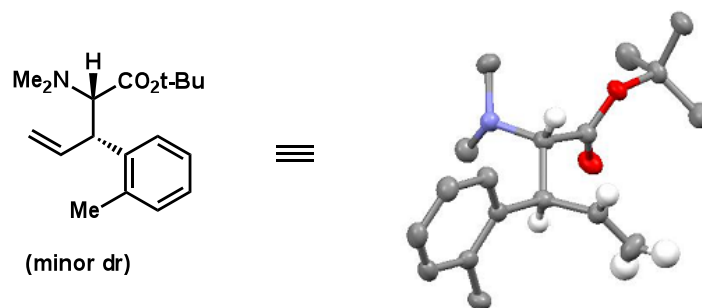

**Compound S2:** A sample of compound **S2** was recrystallized from 1:1/hexanes:chloroform (slow evaporation). The resulting crystals were suitable for X-ray diffraction and the structure was solved. This structure allowed the assignment of relative configuration as shown.

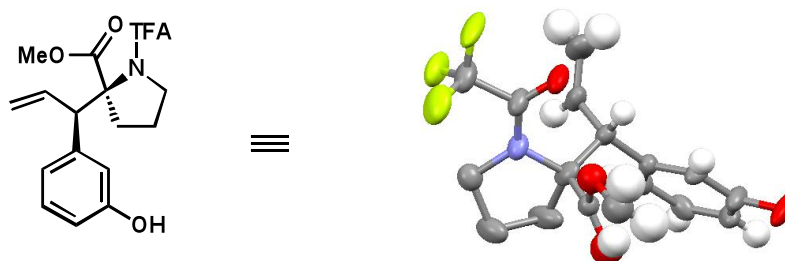

IX.  $^1\text{H}$  and  $^{13}\text{C}$  NMR Spectra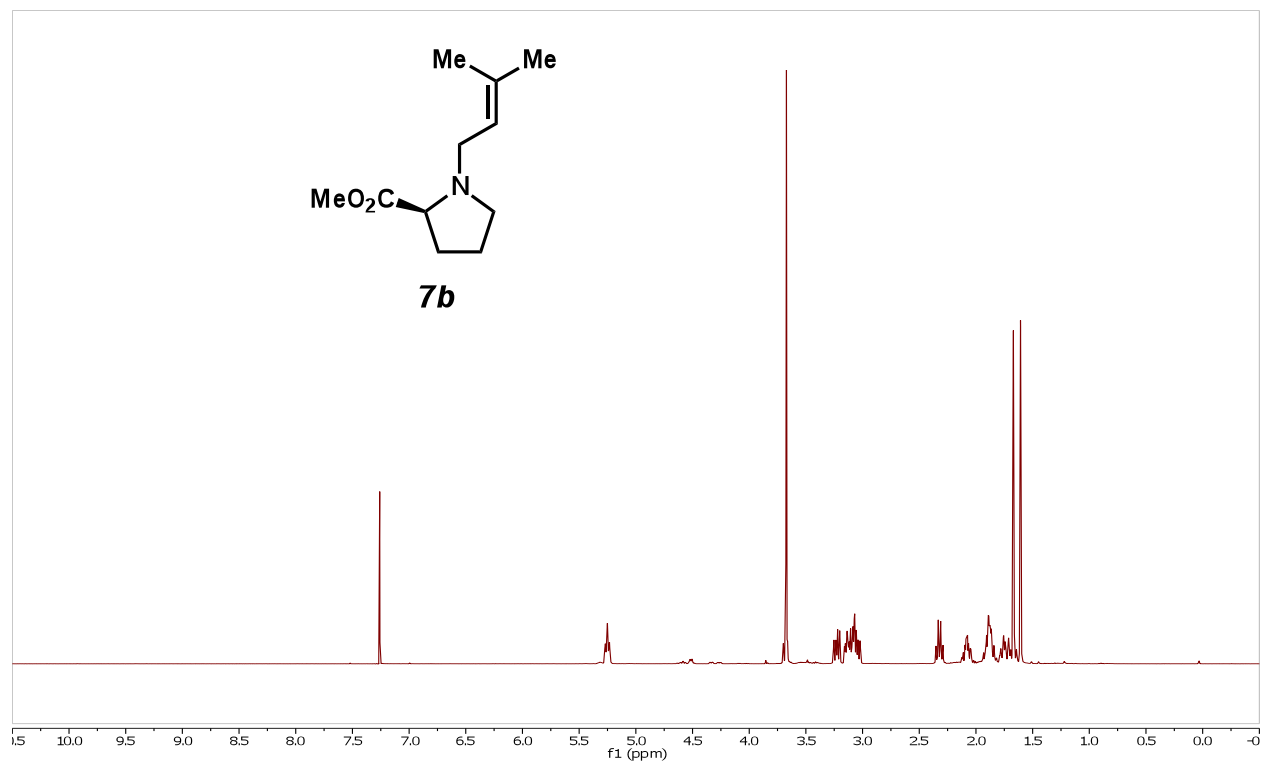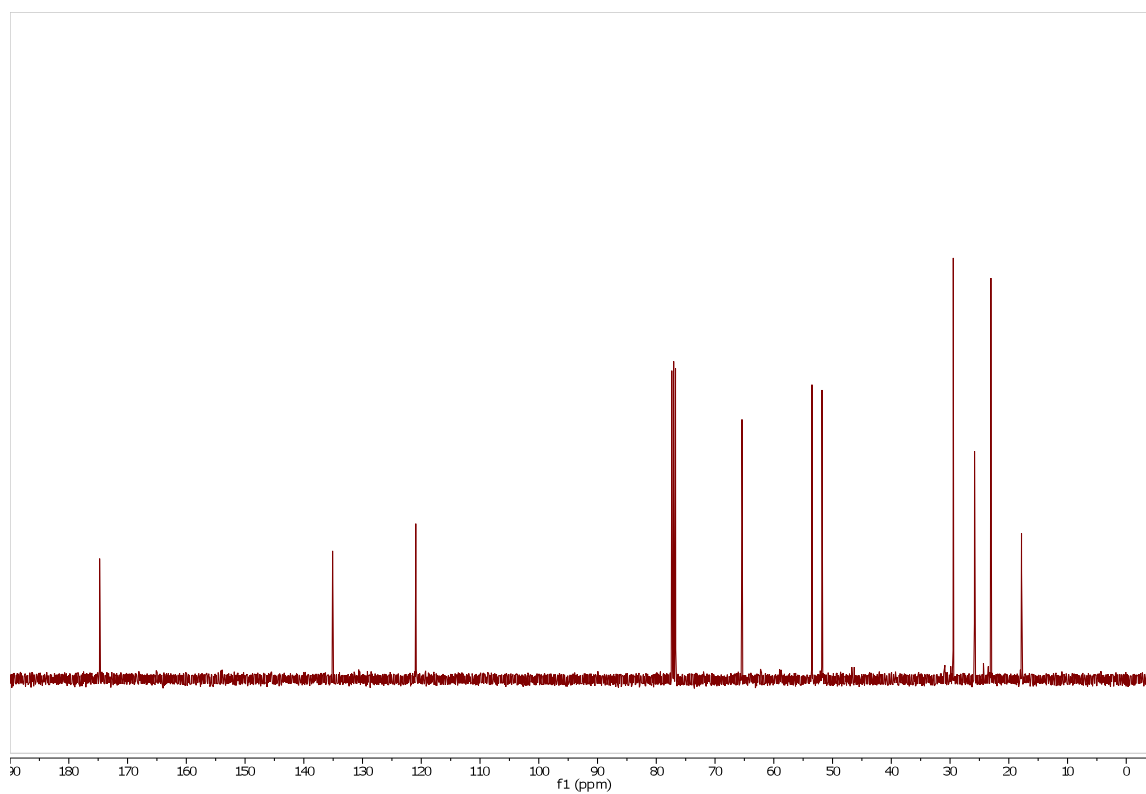

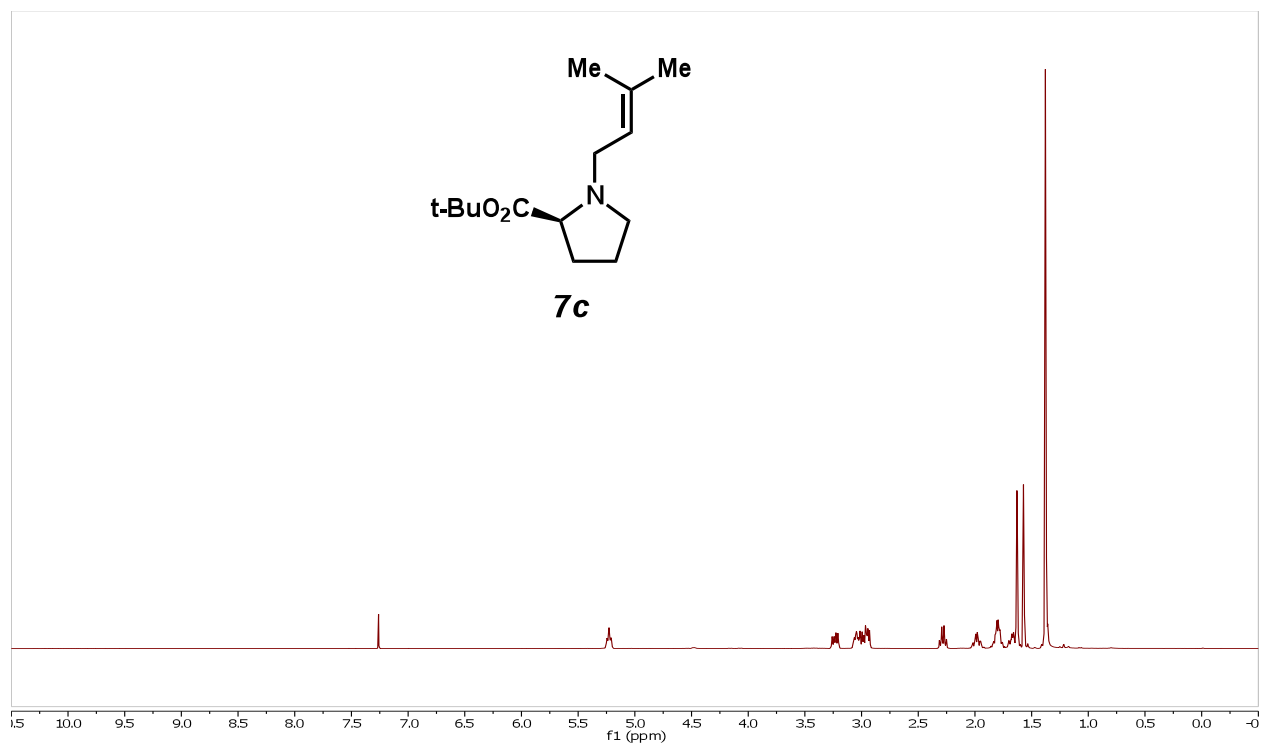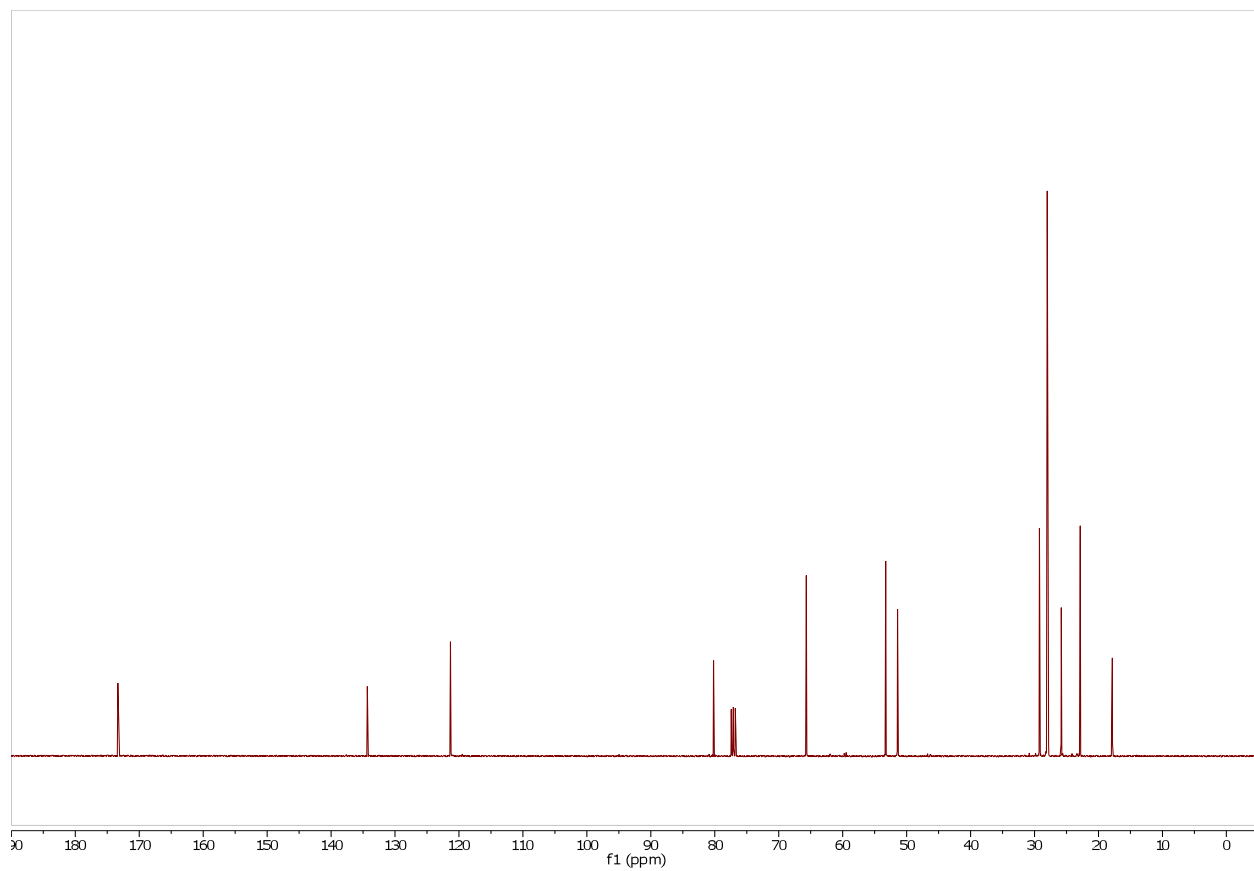

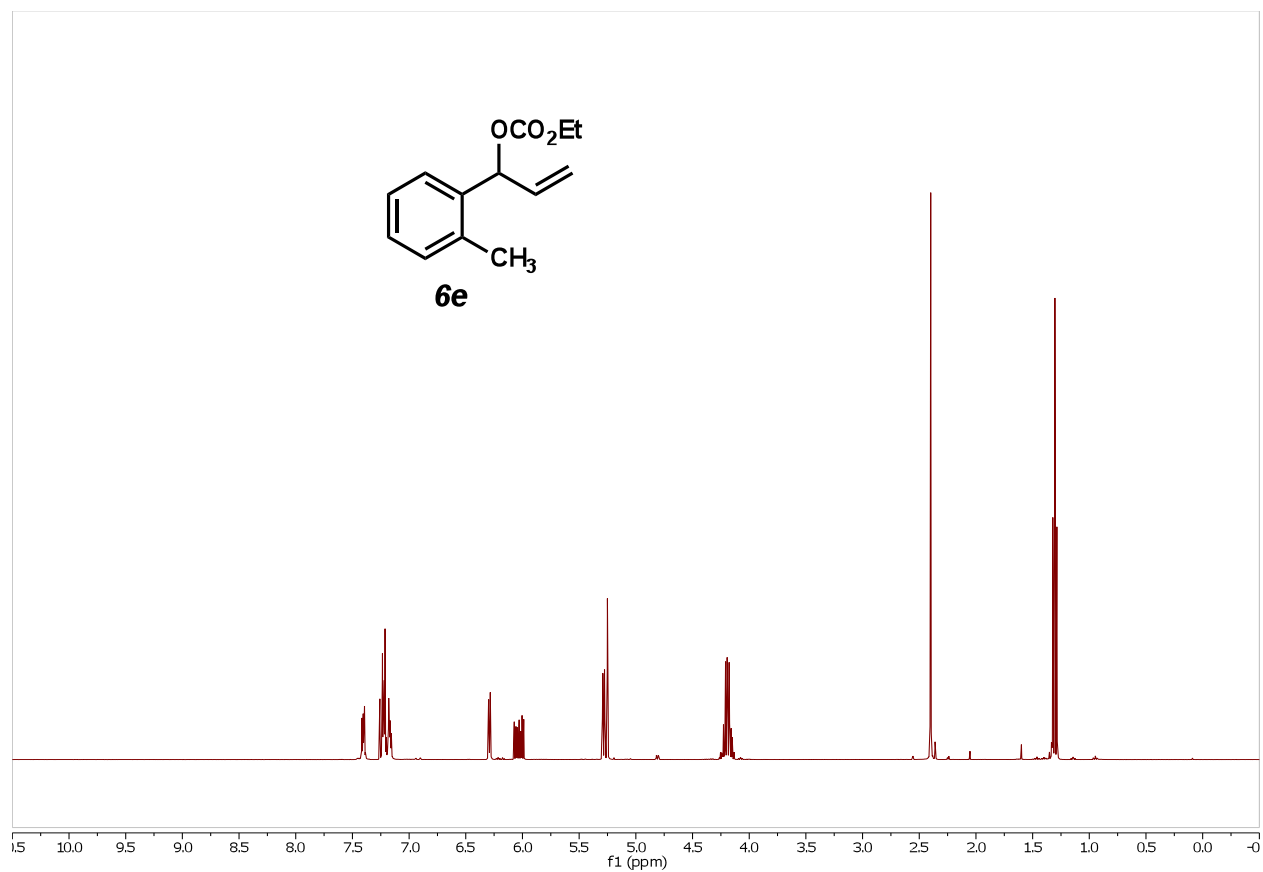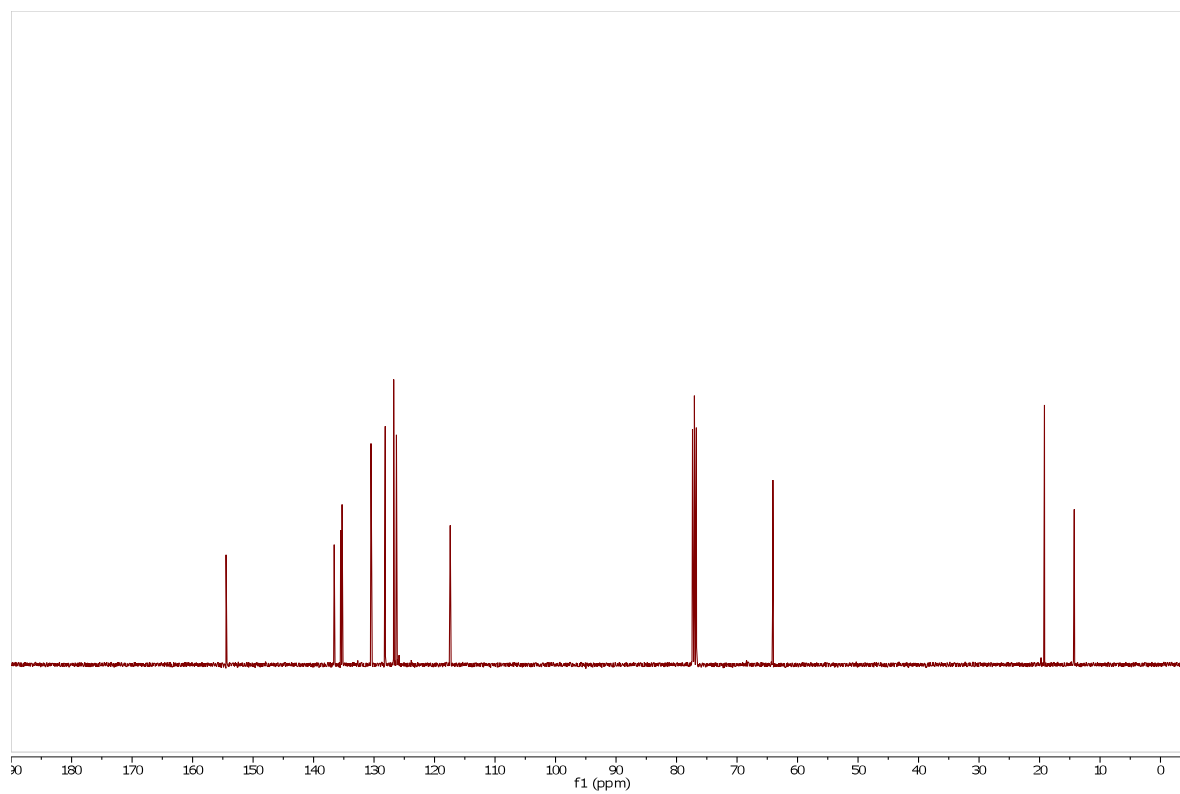

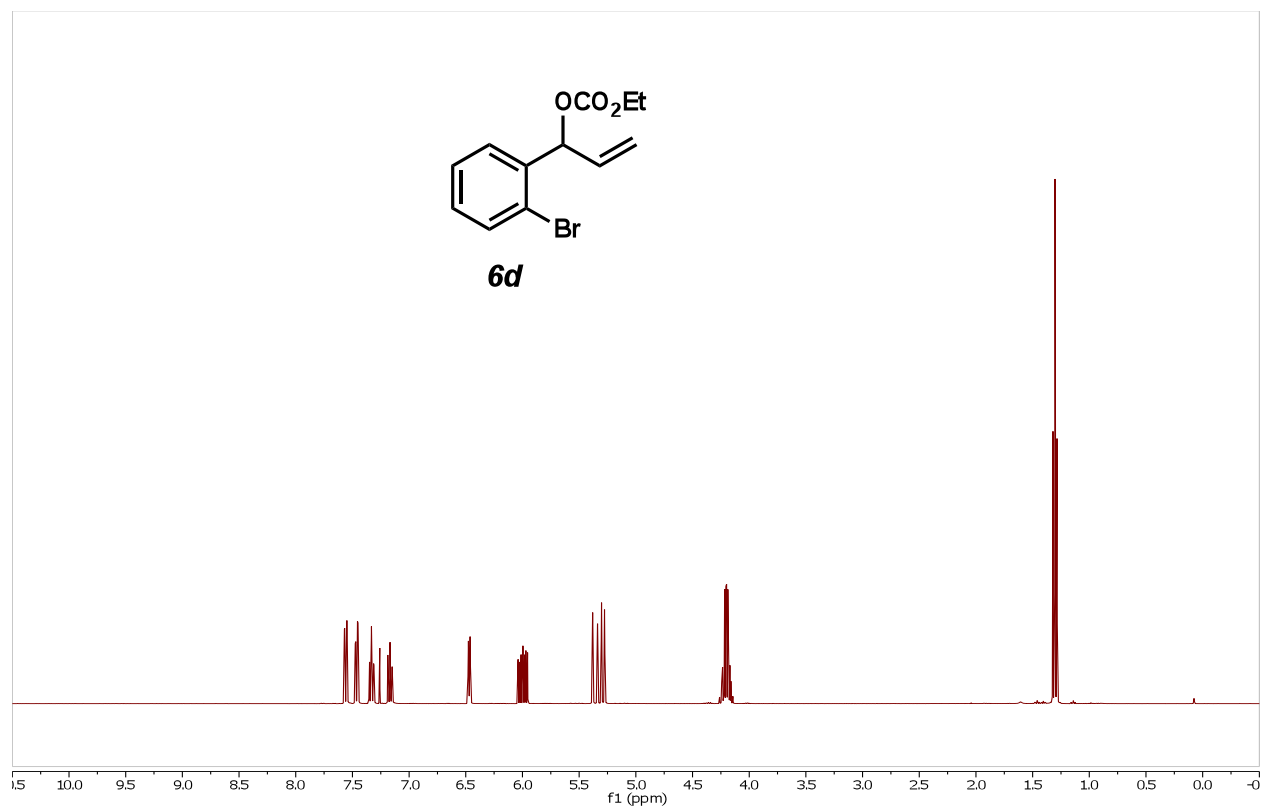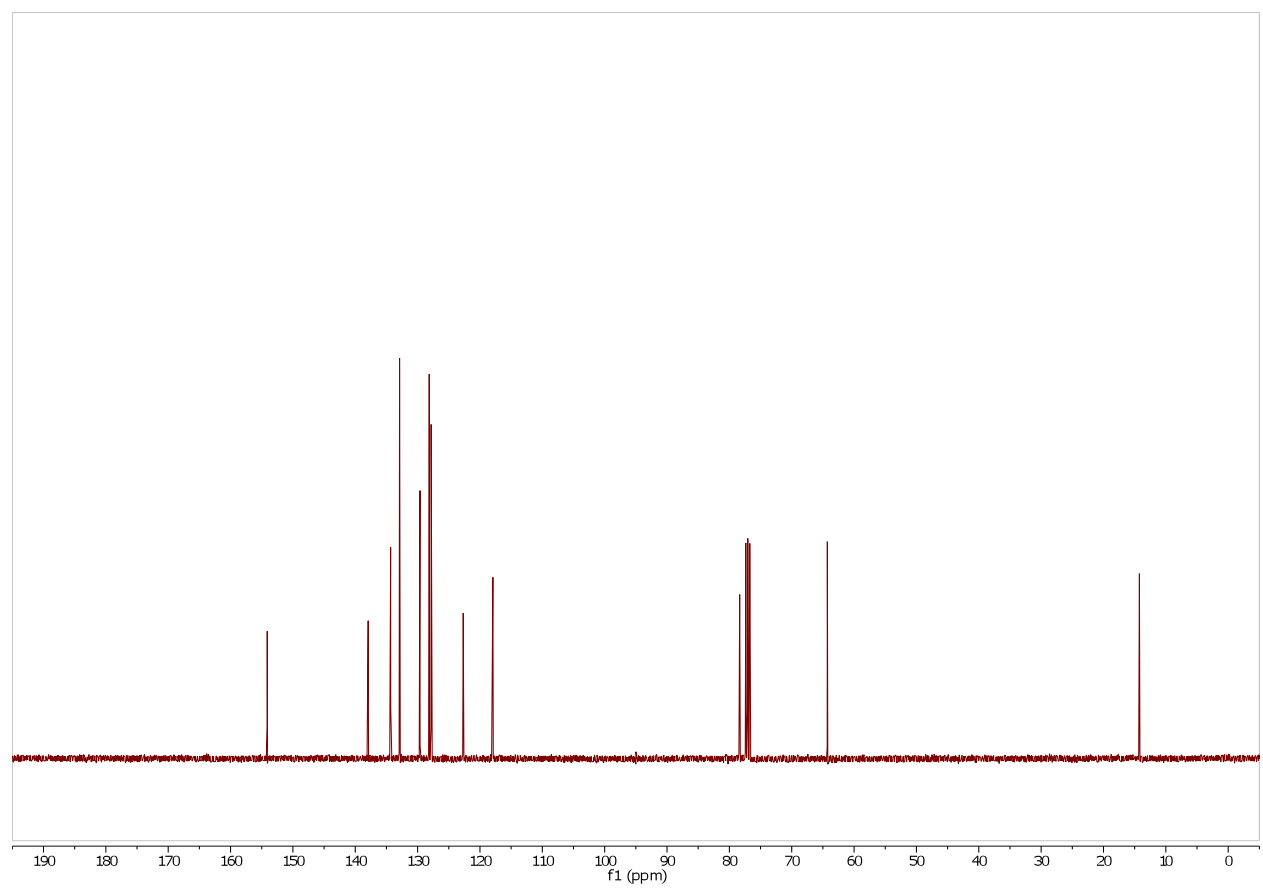

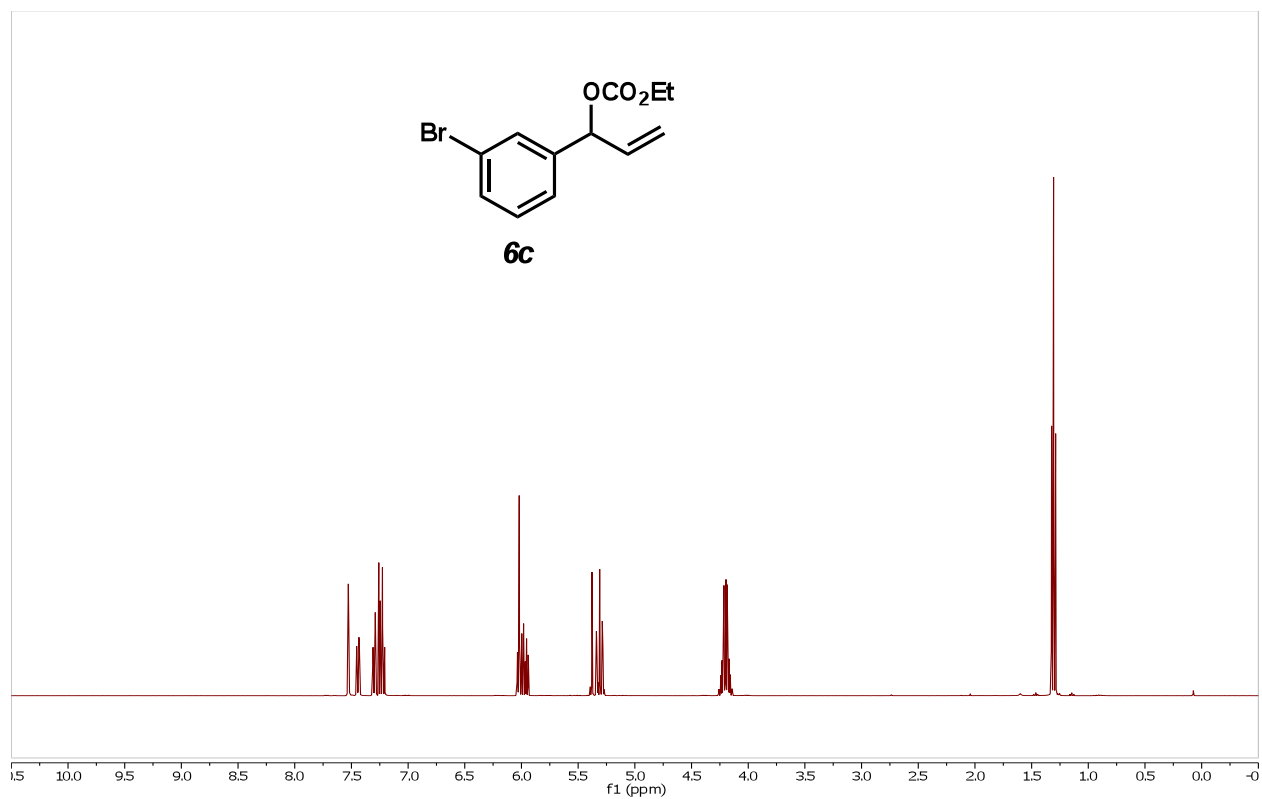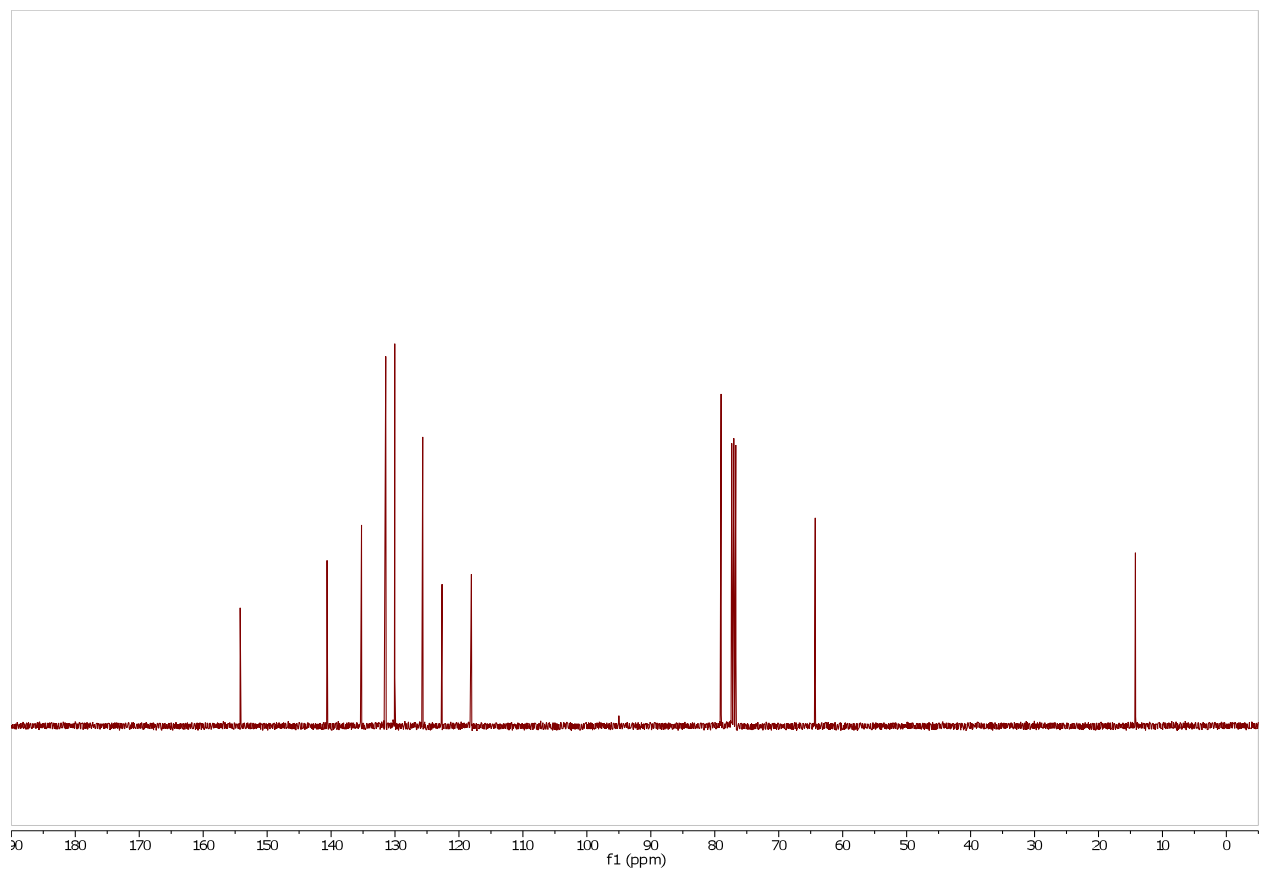

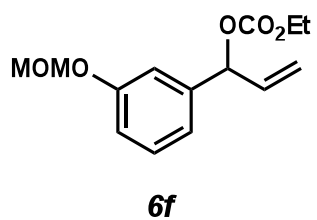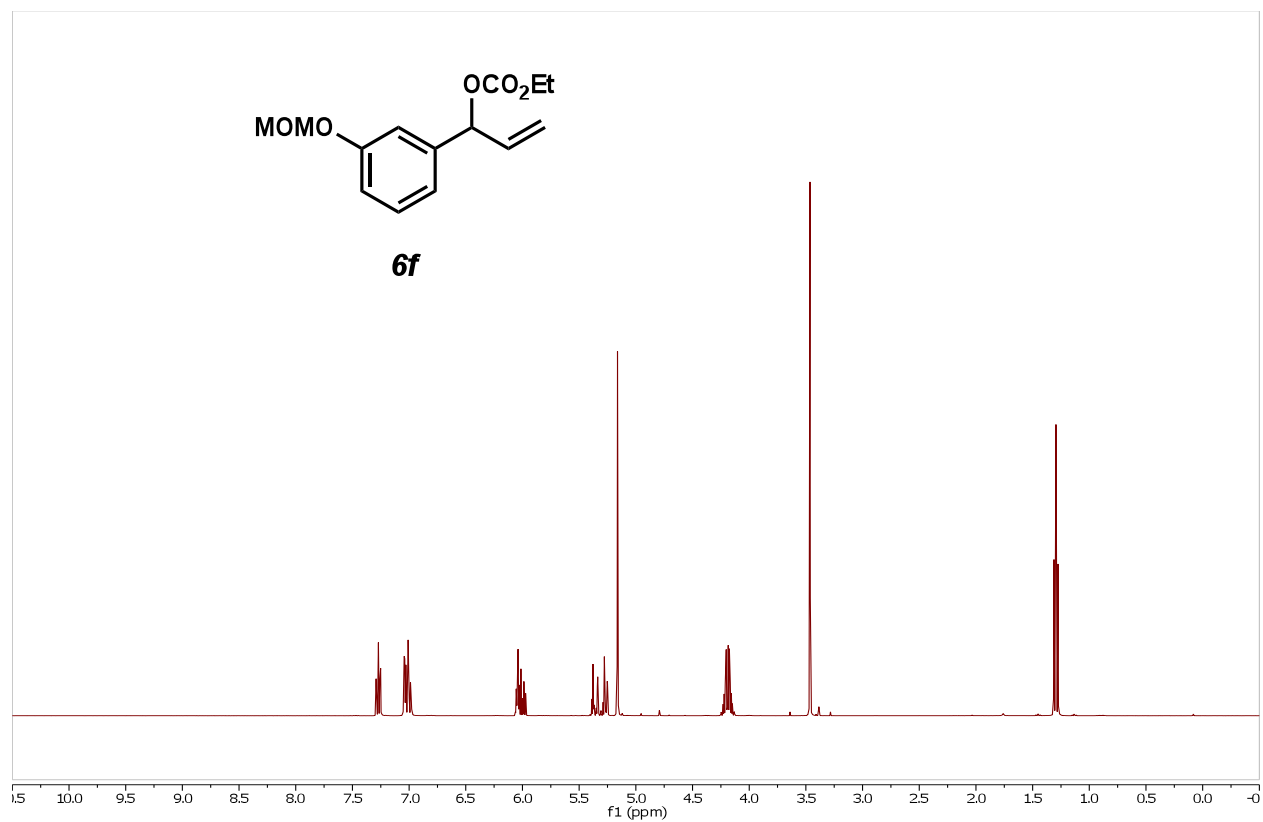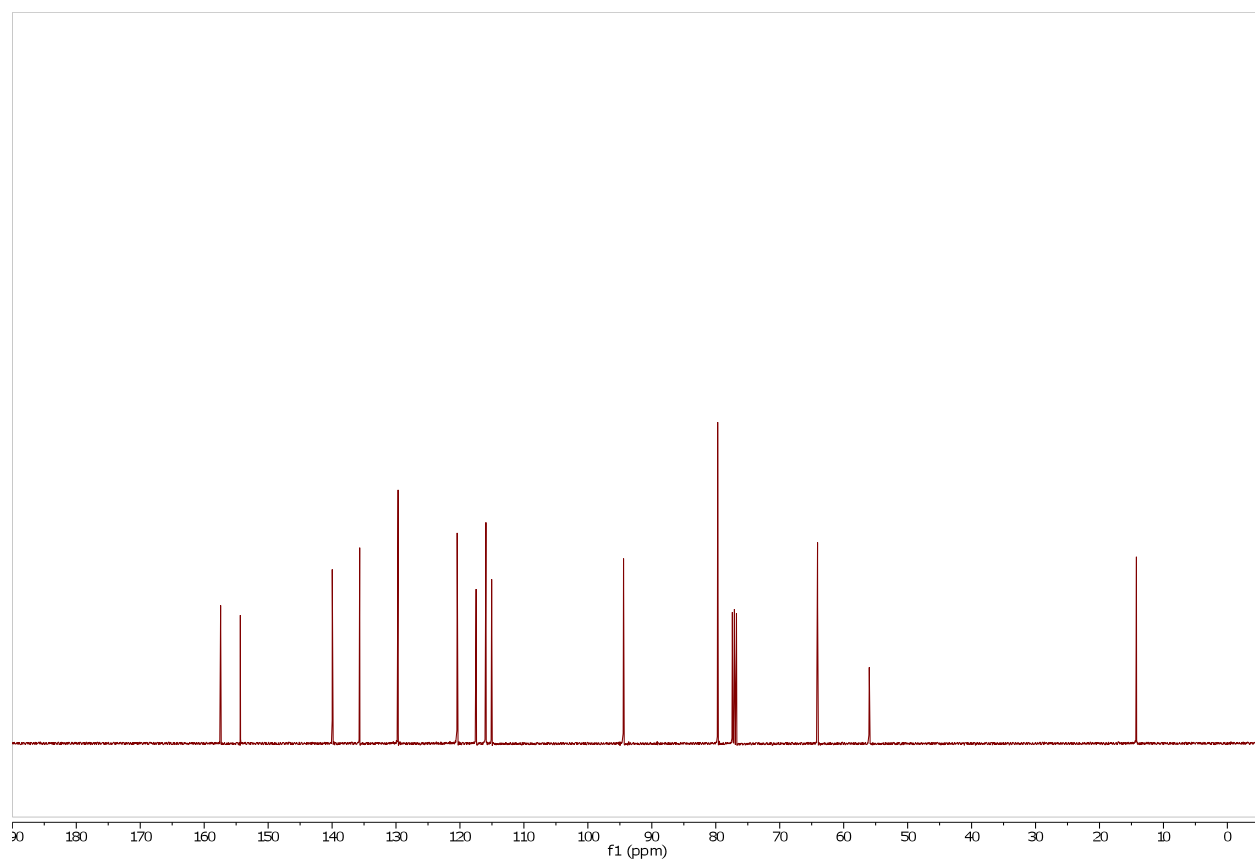



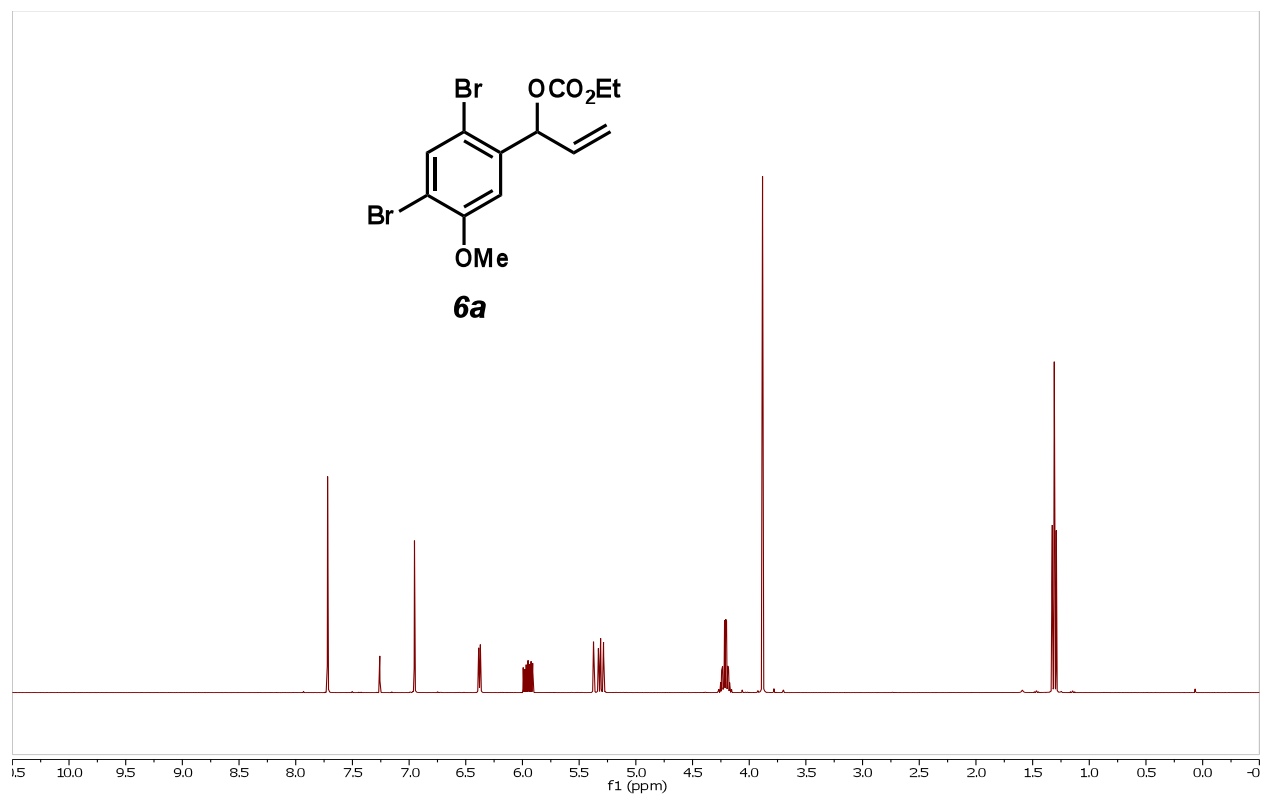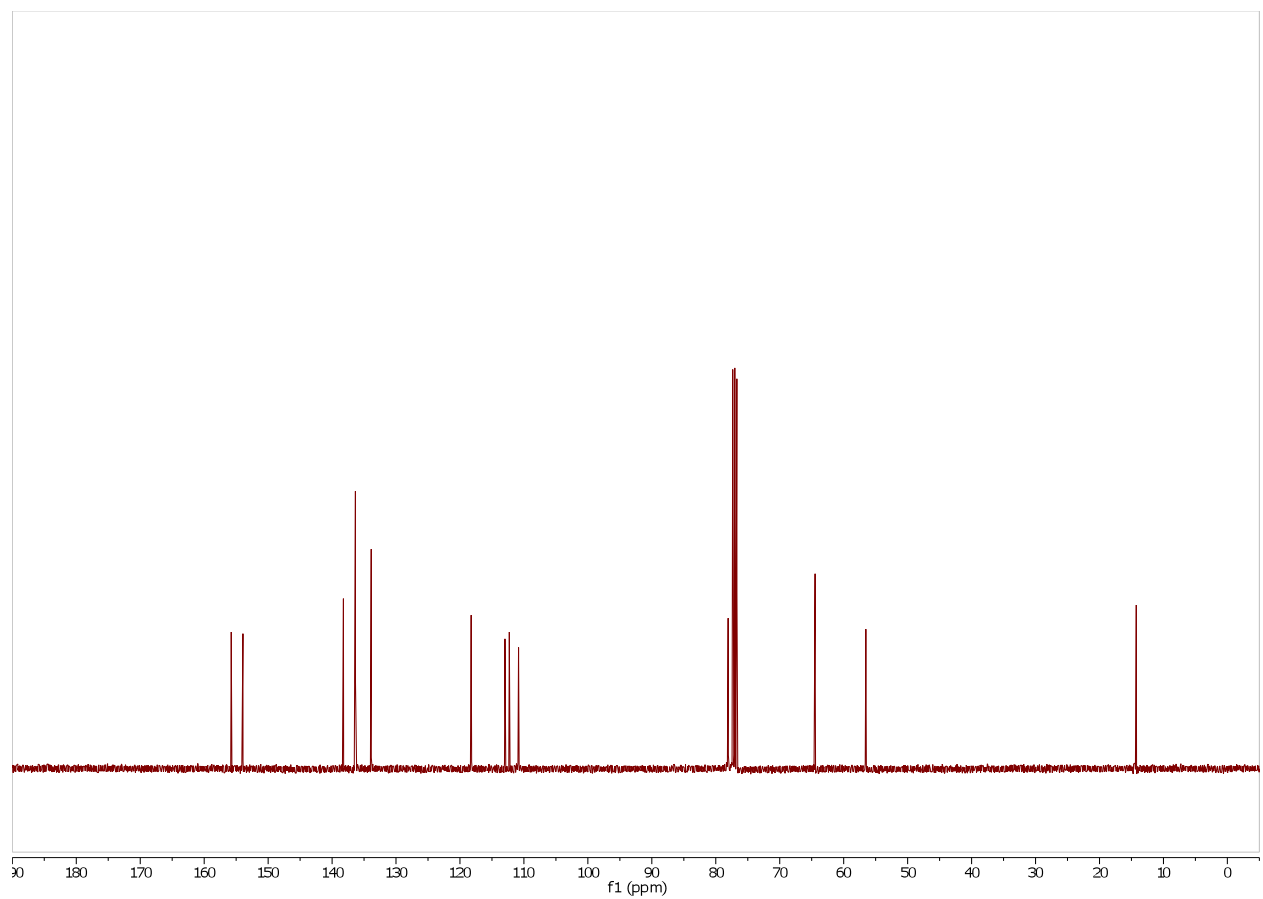

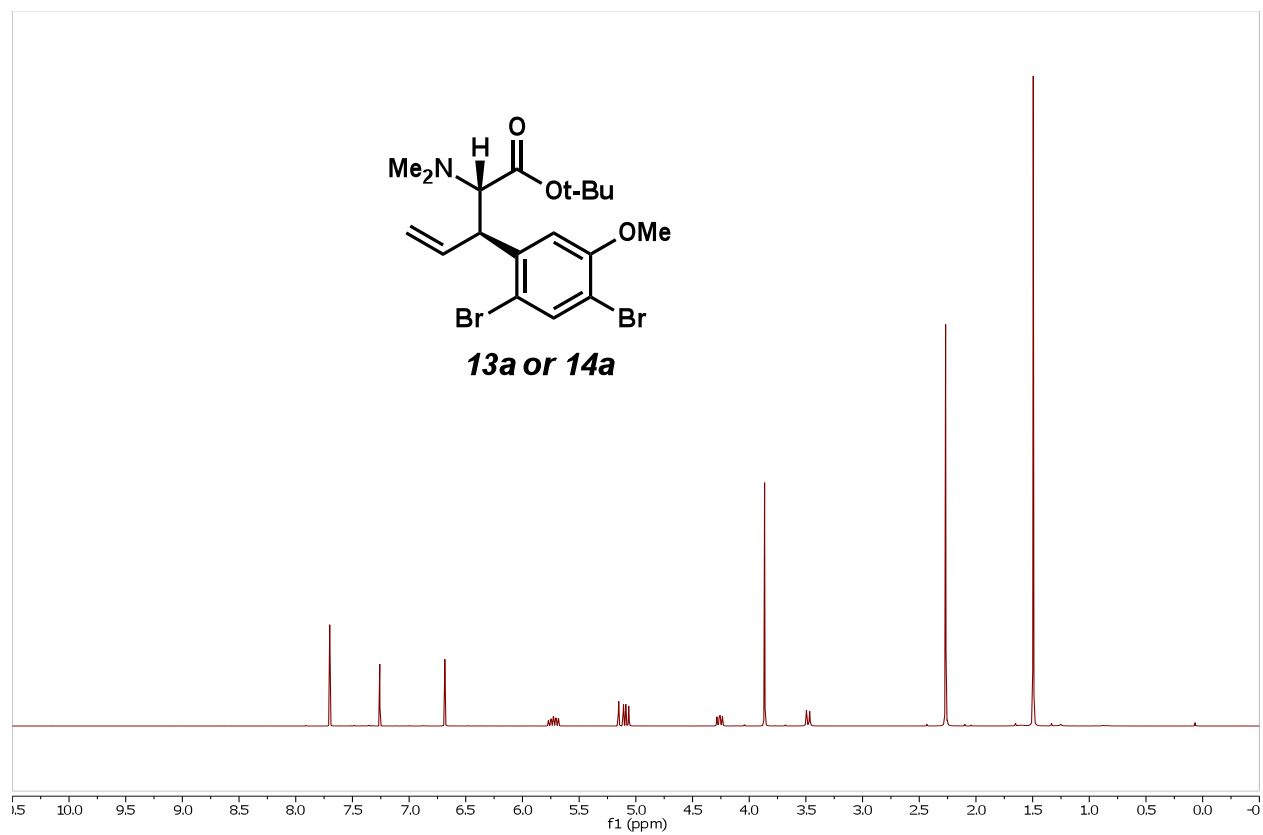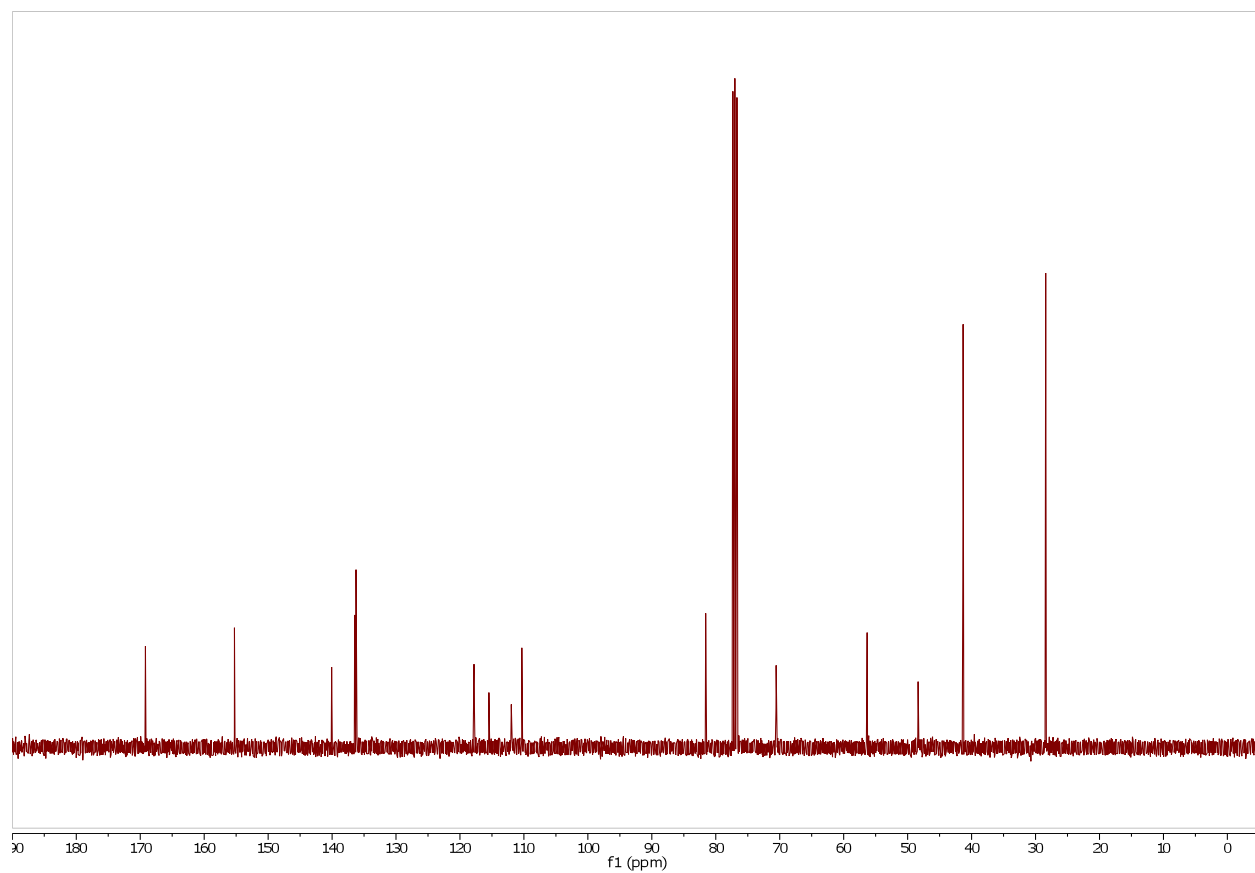

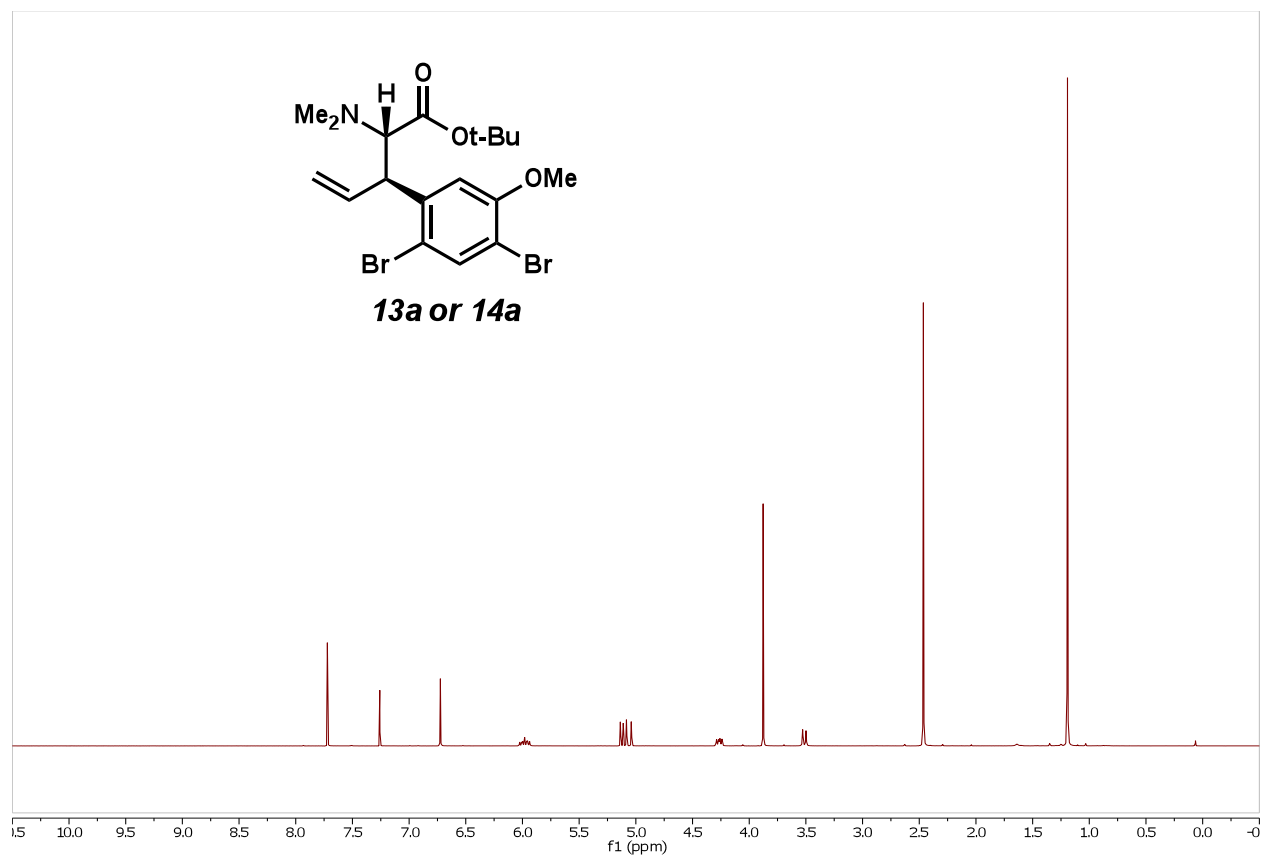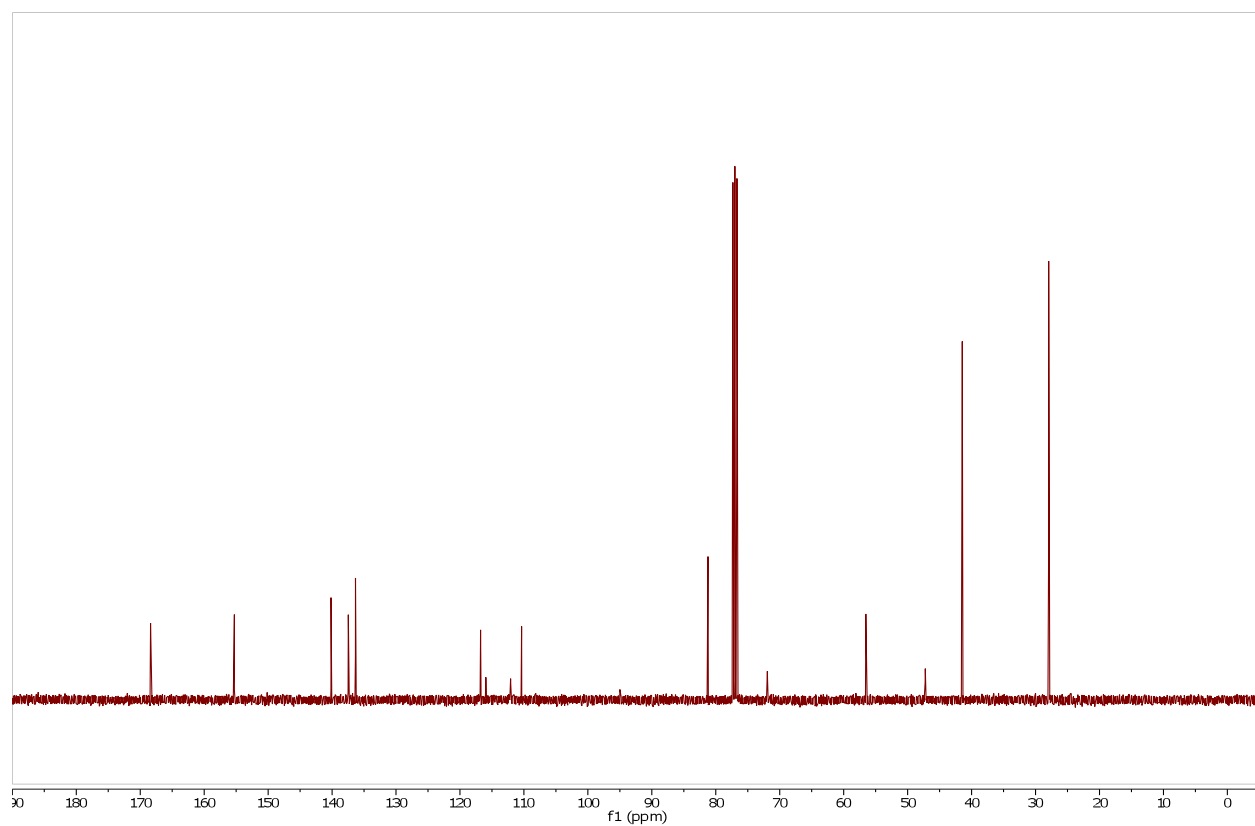

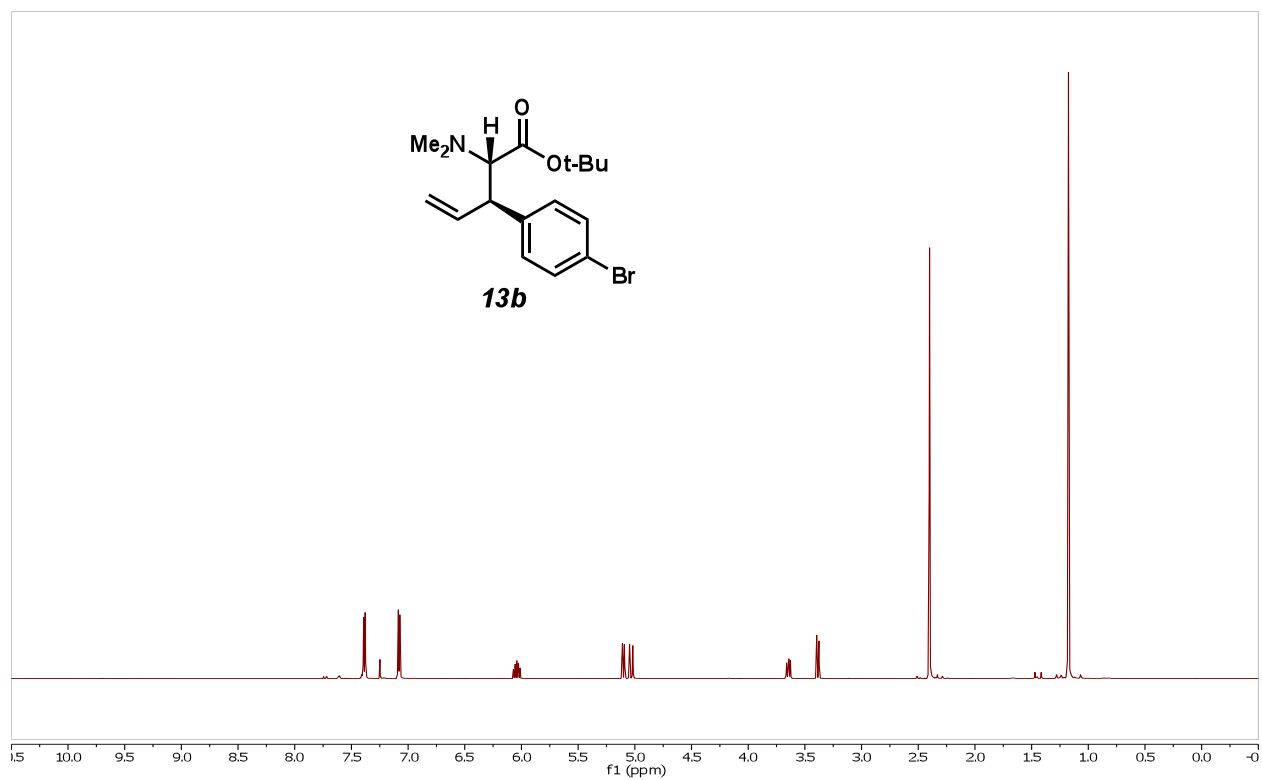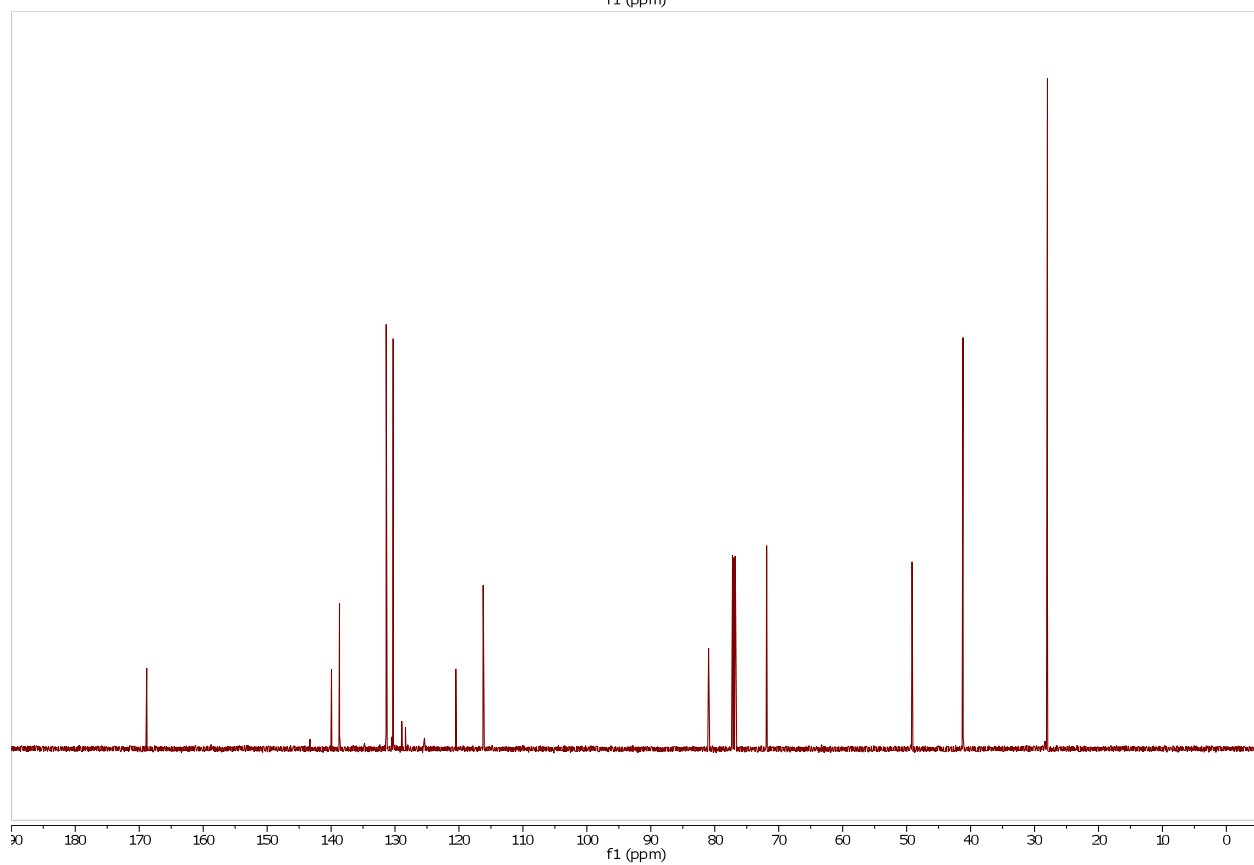

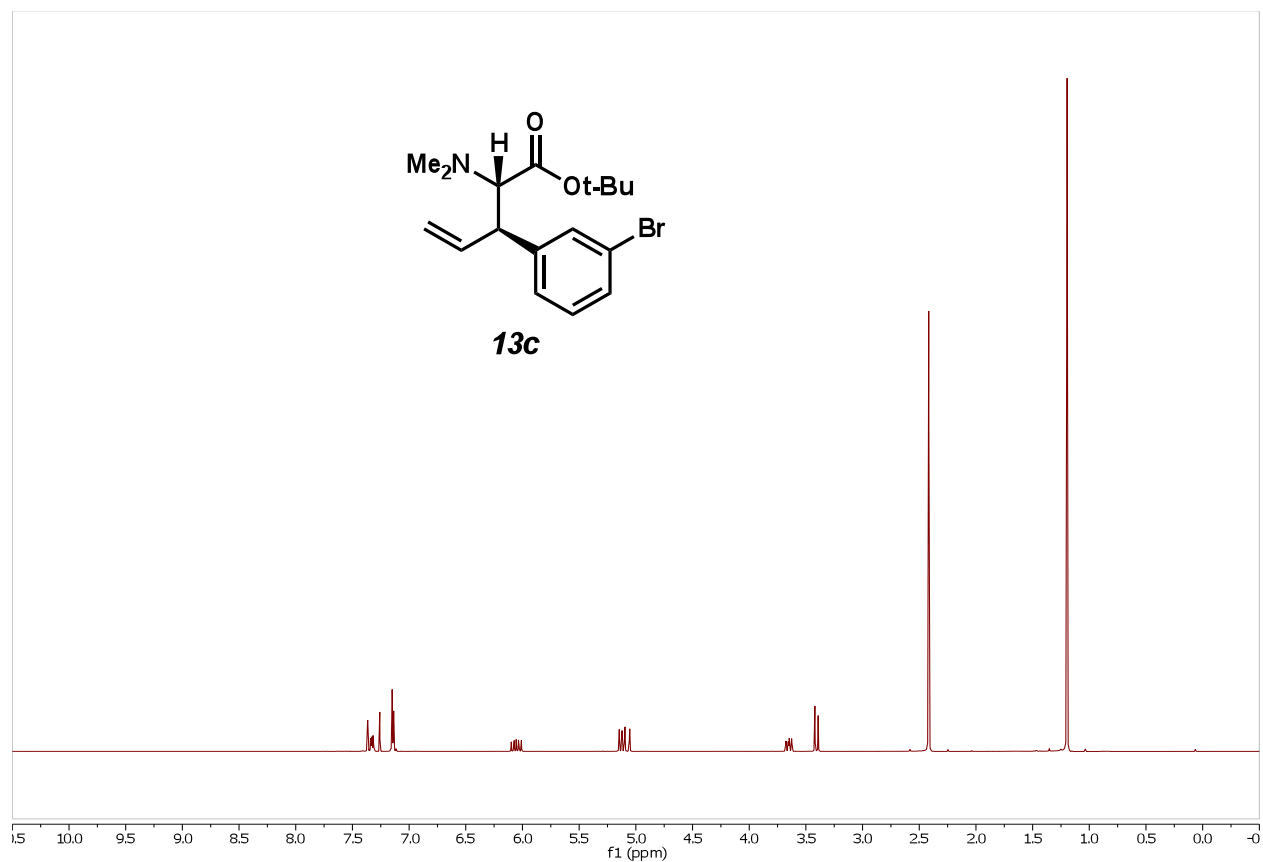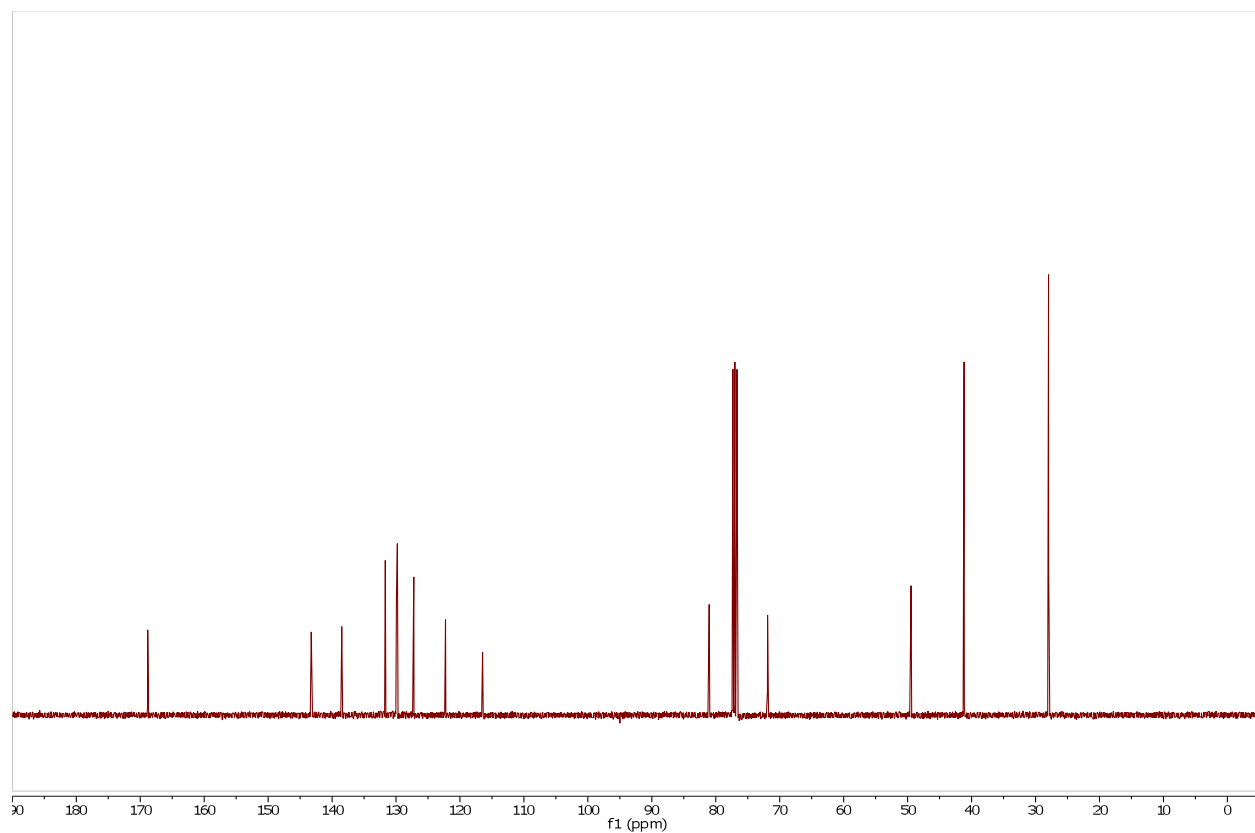

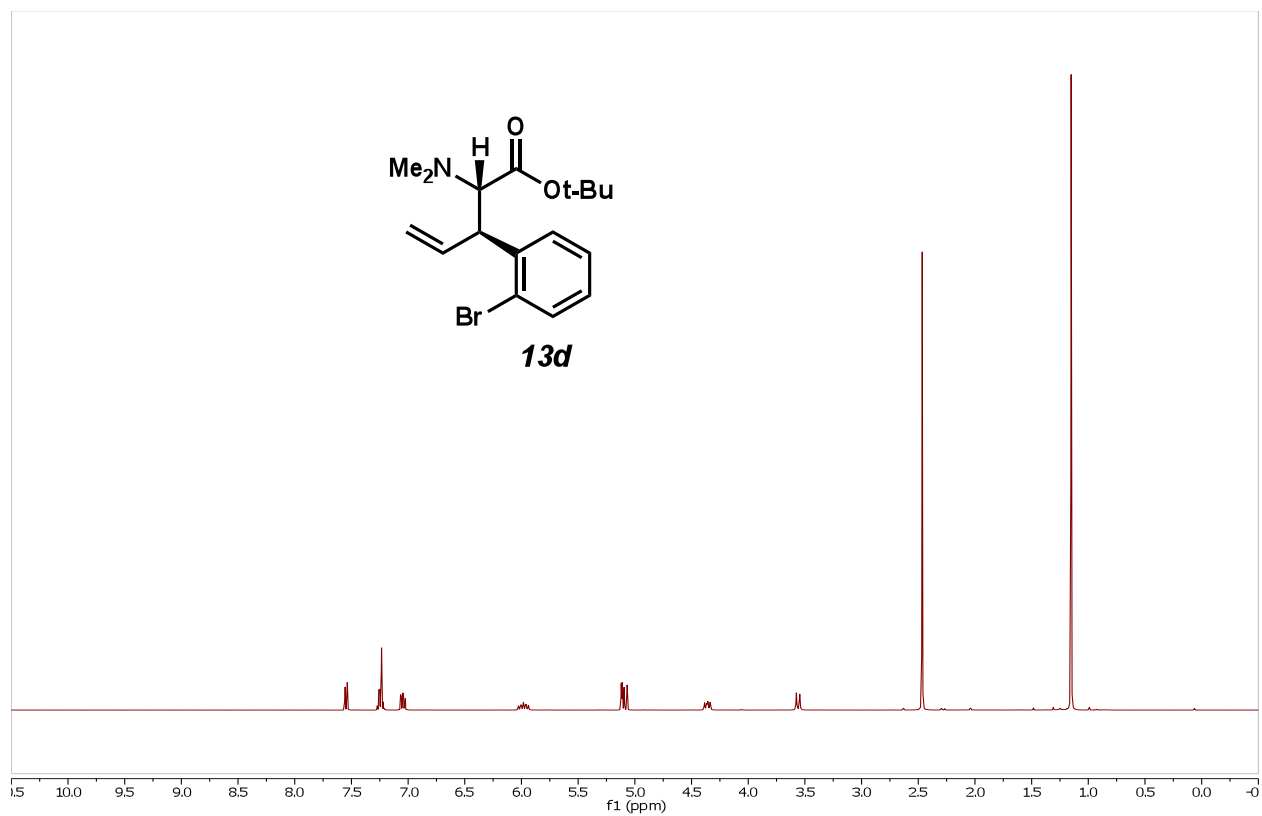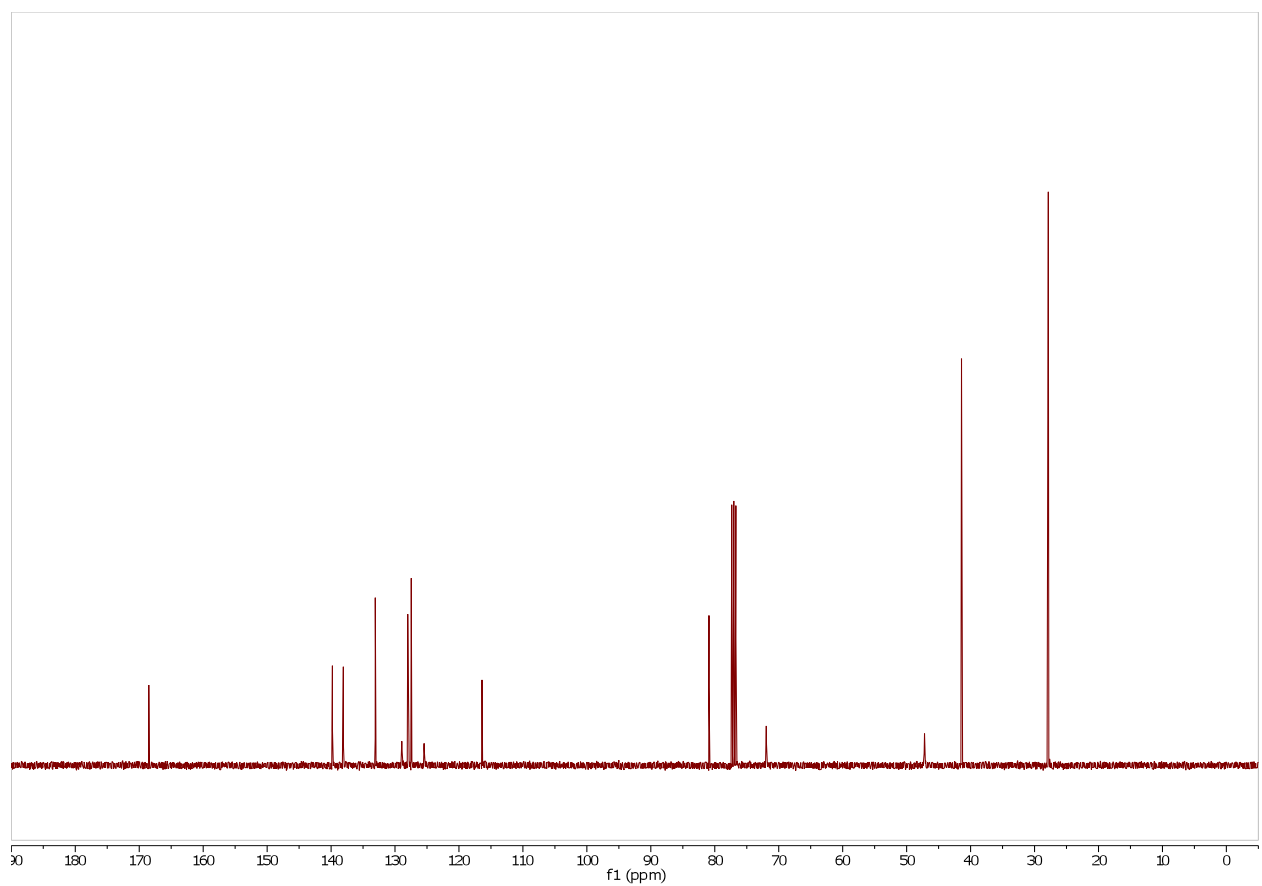

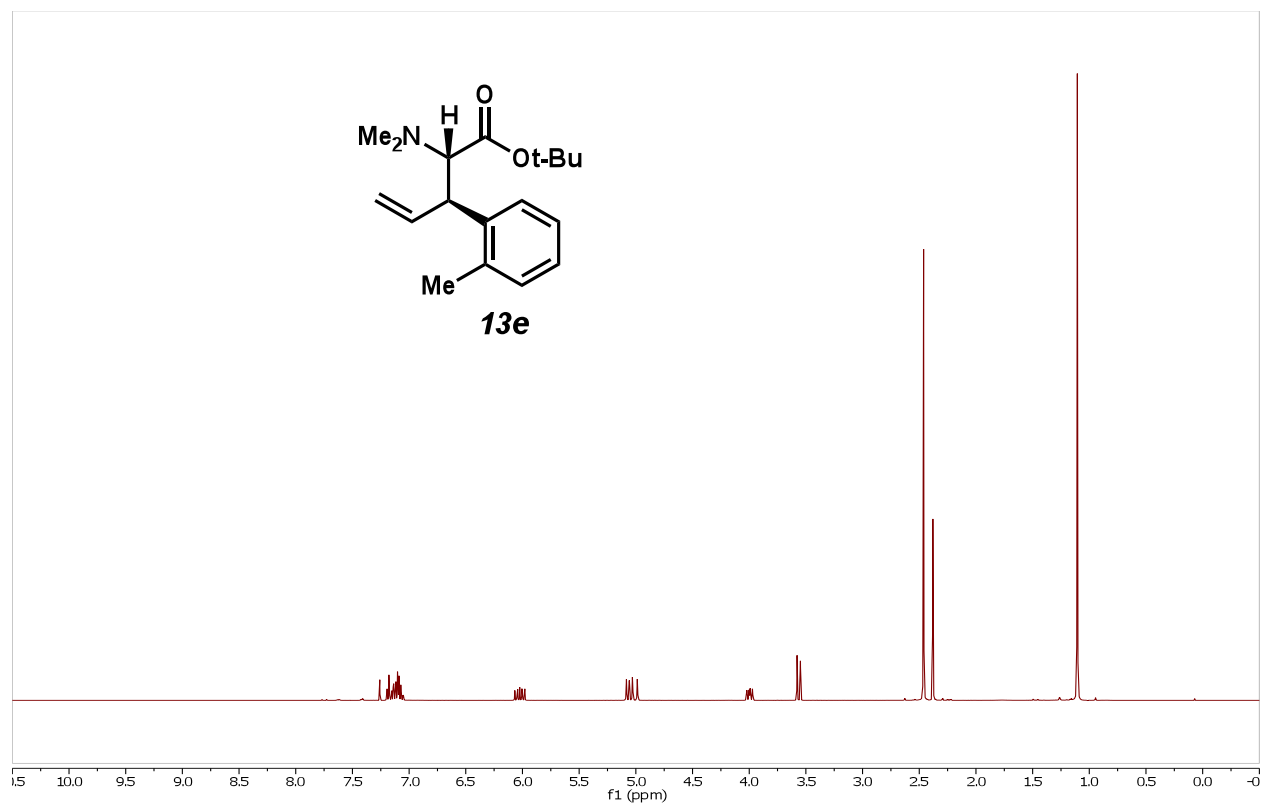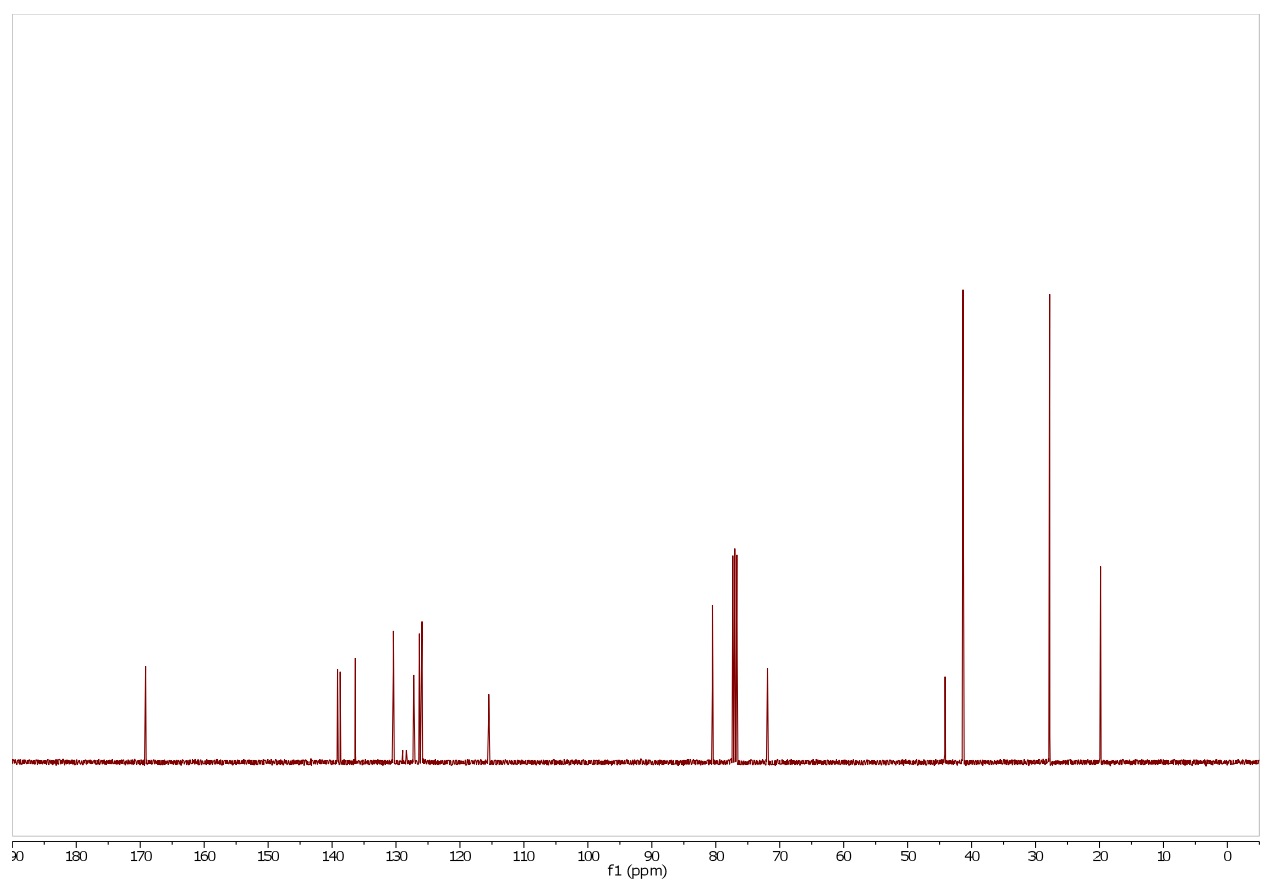

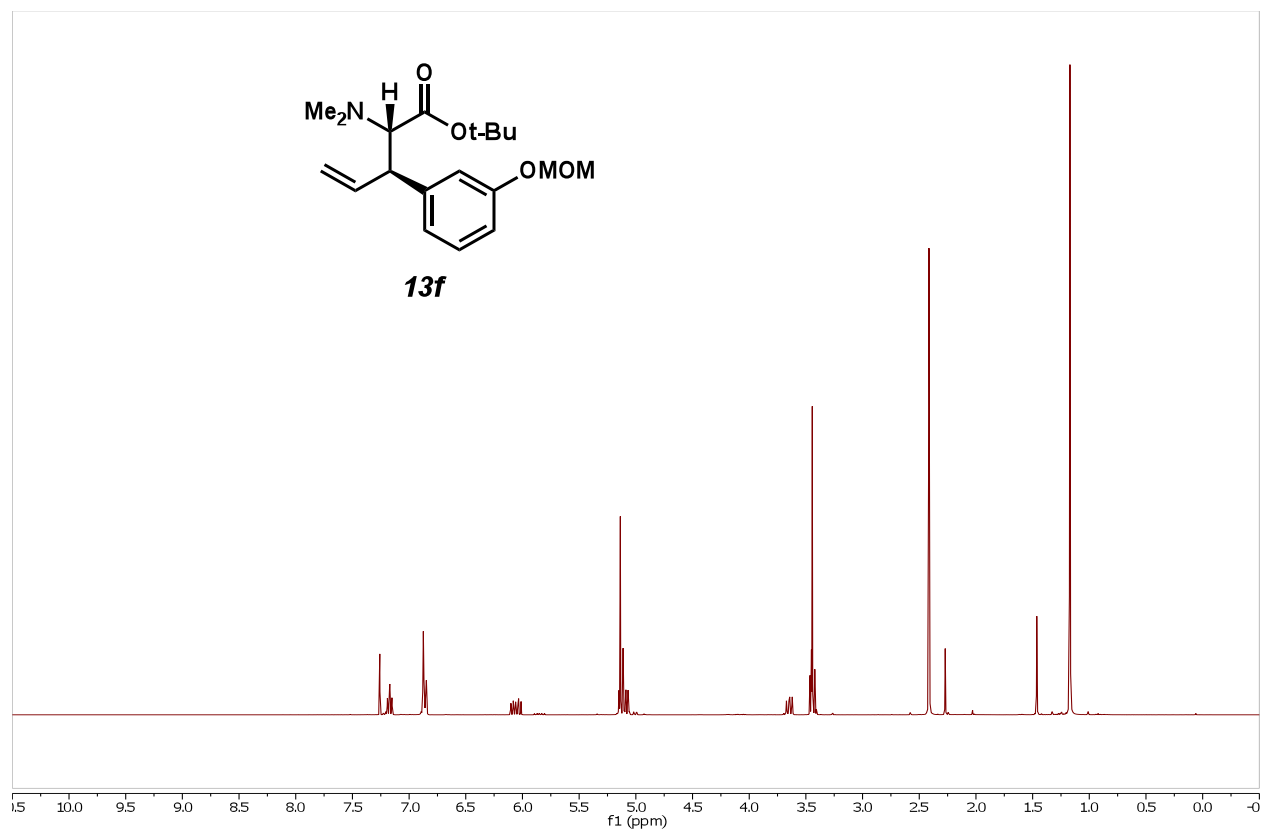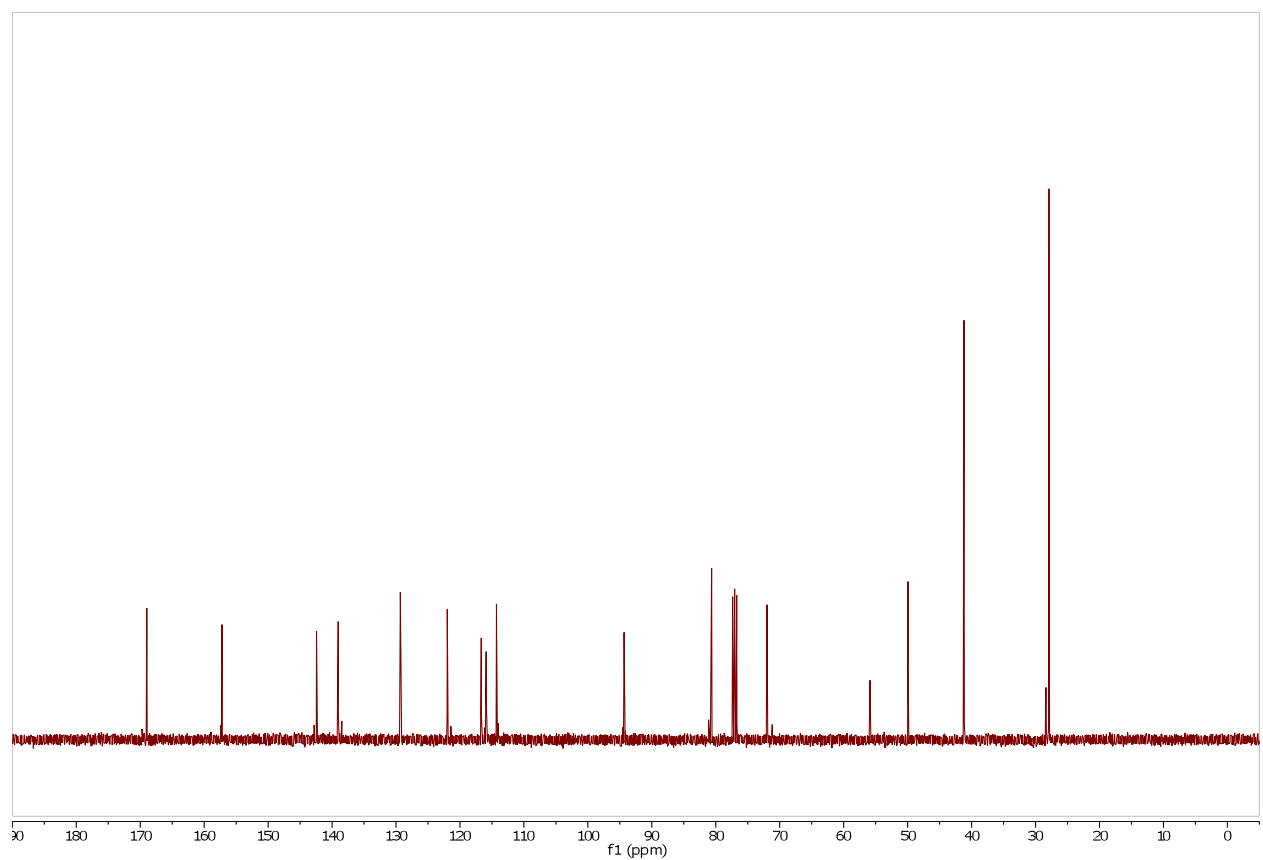



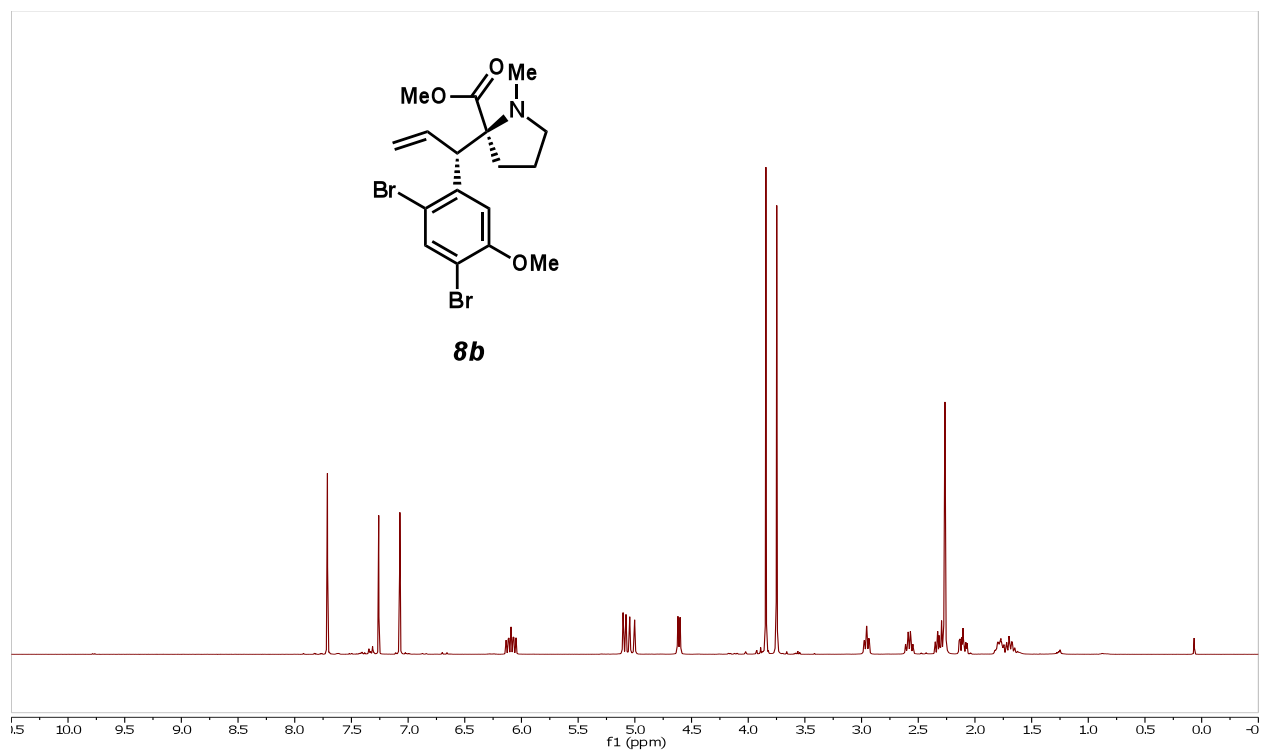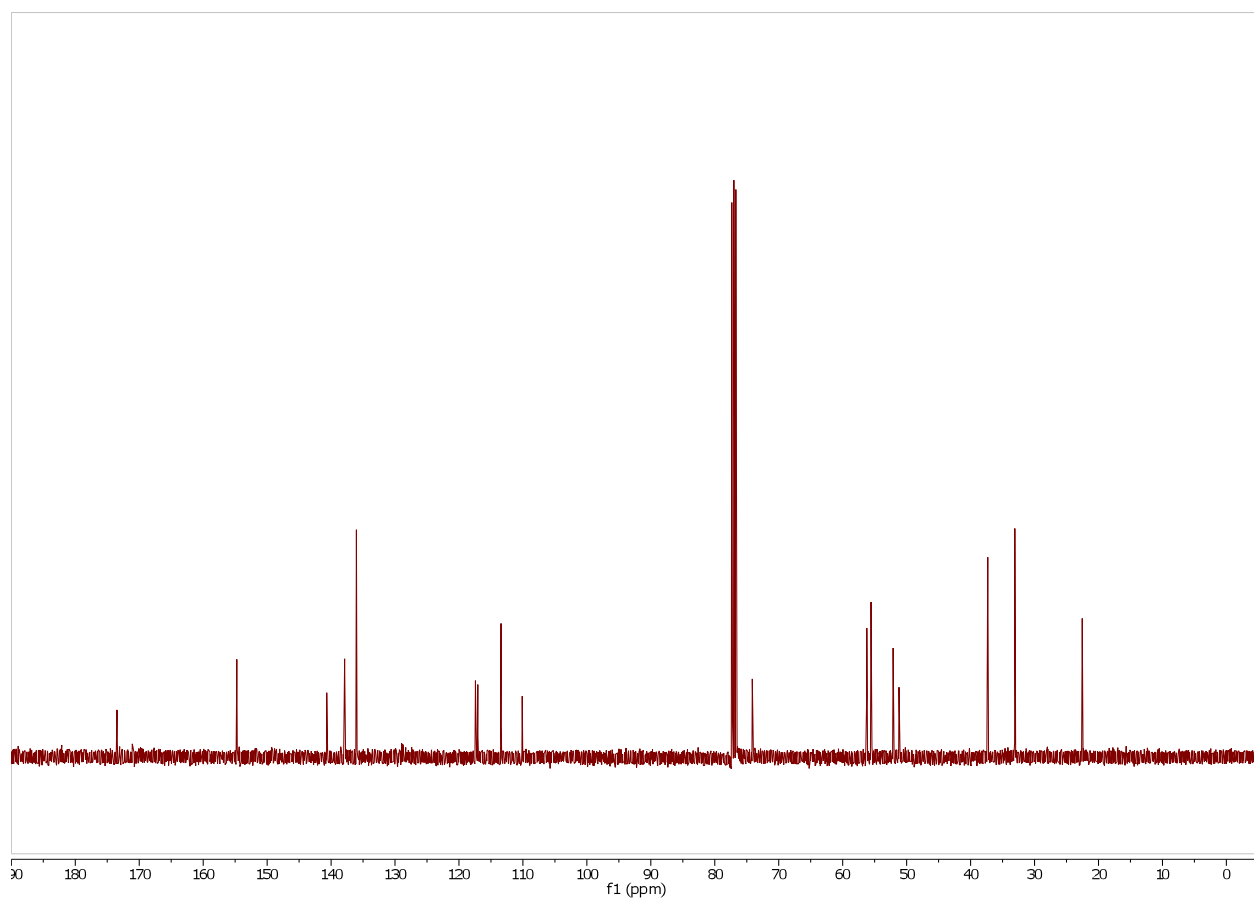

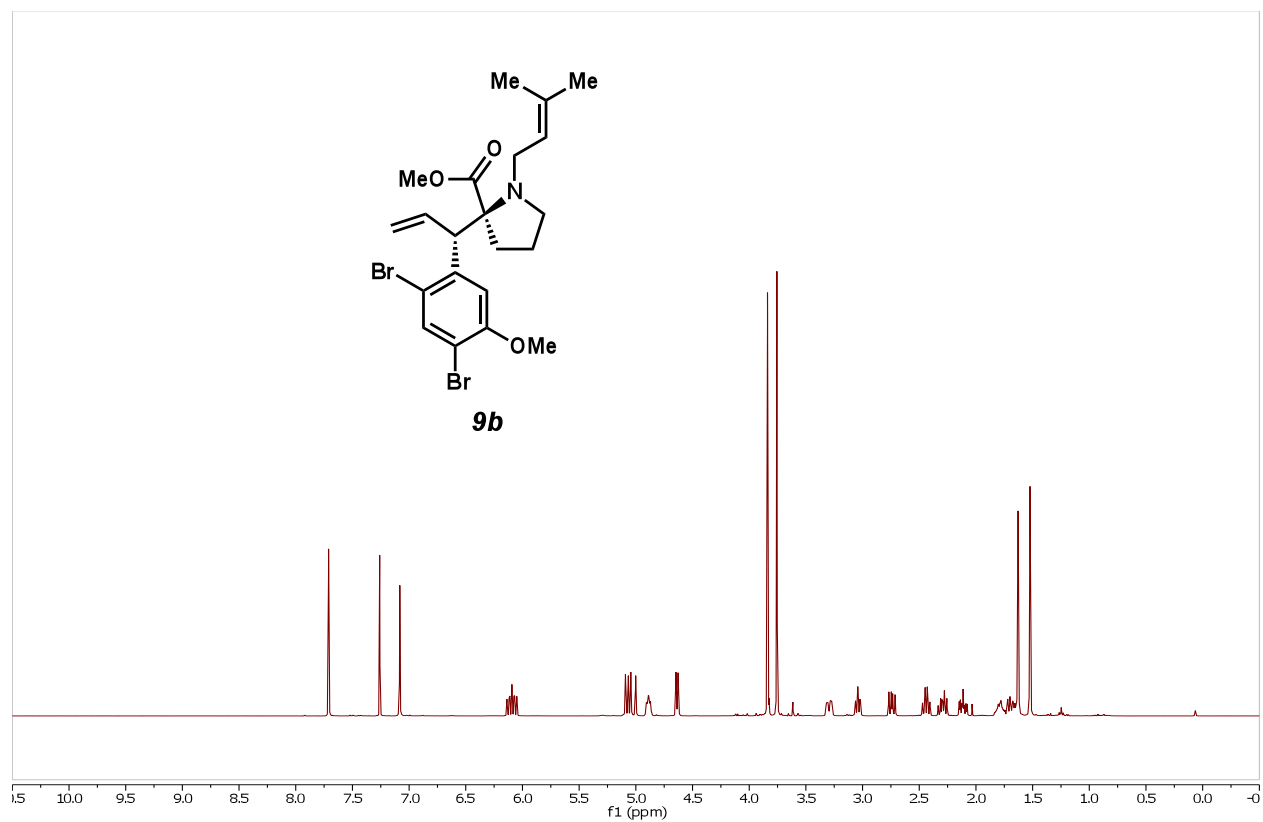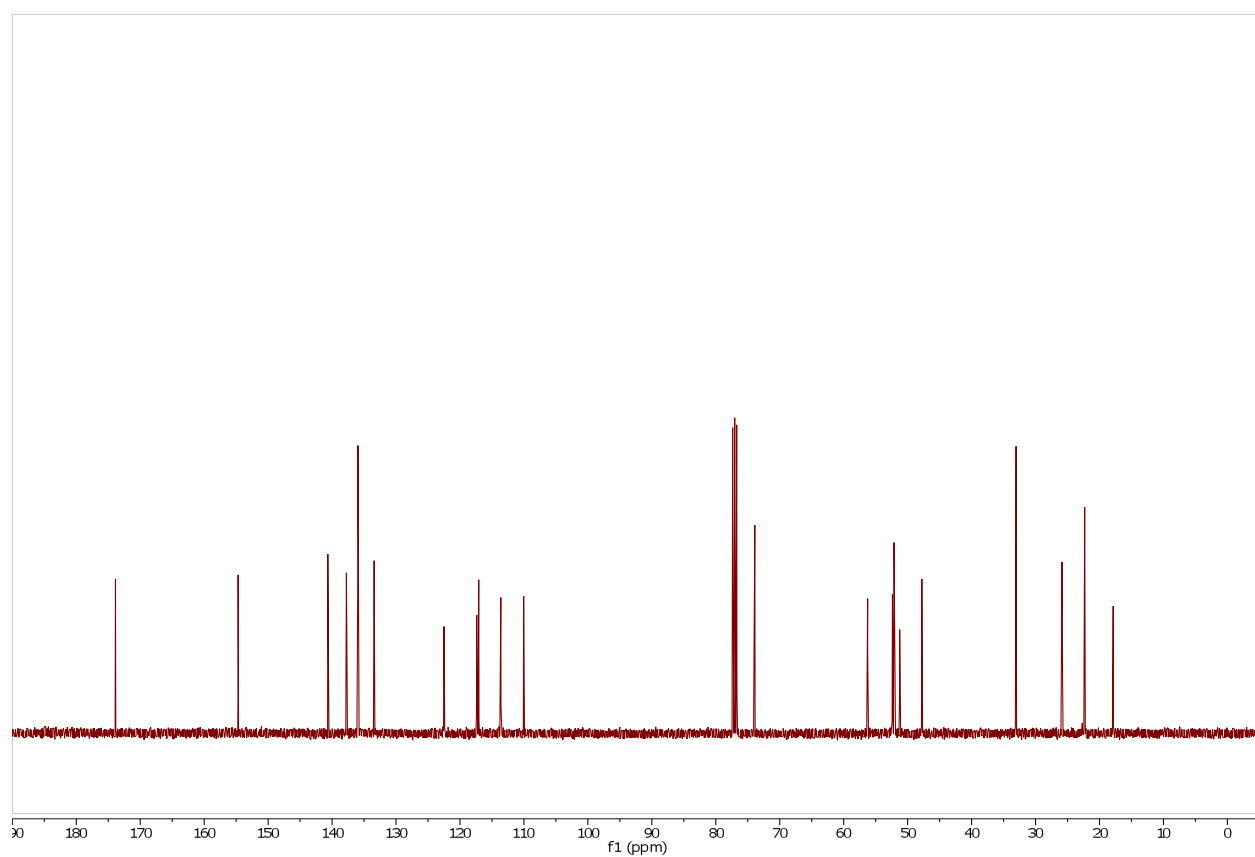

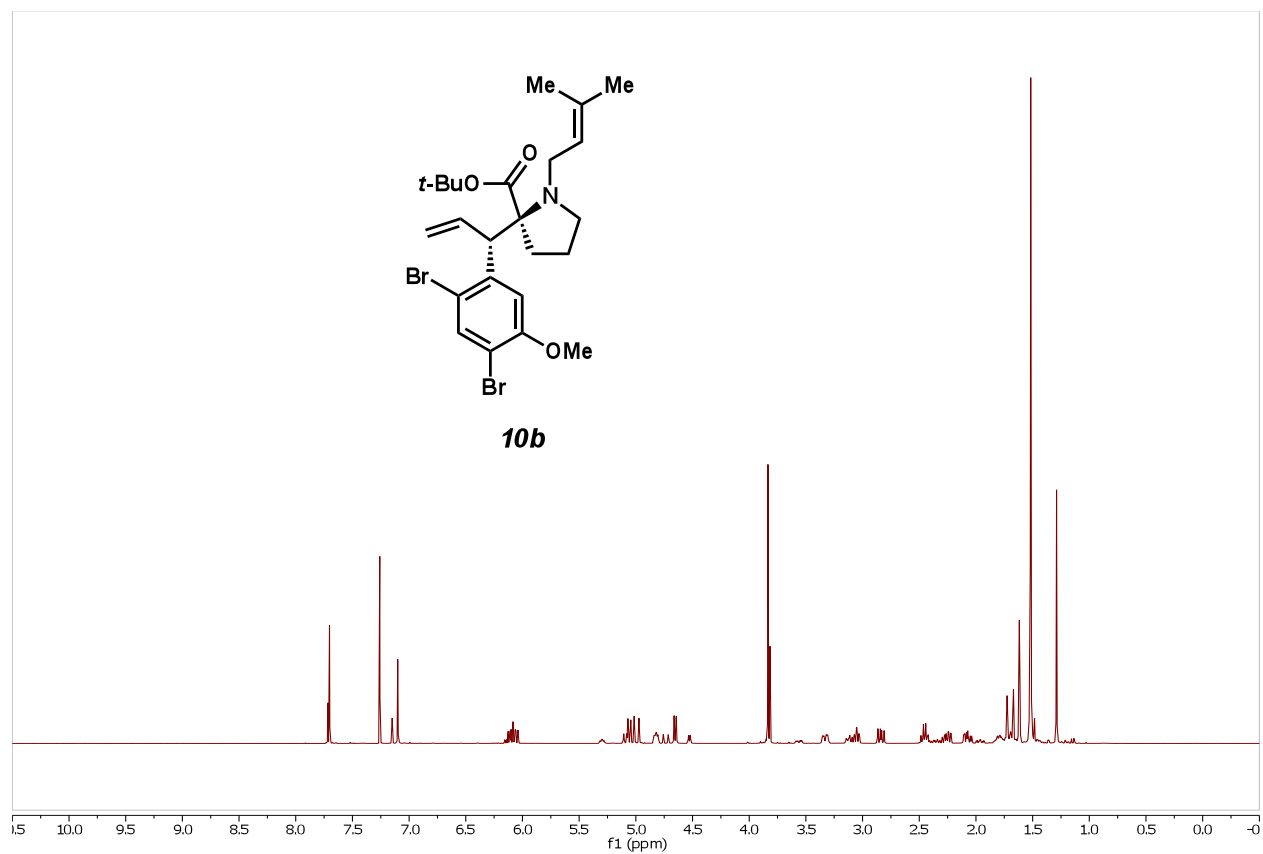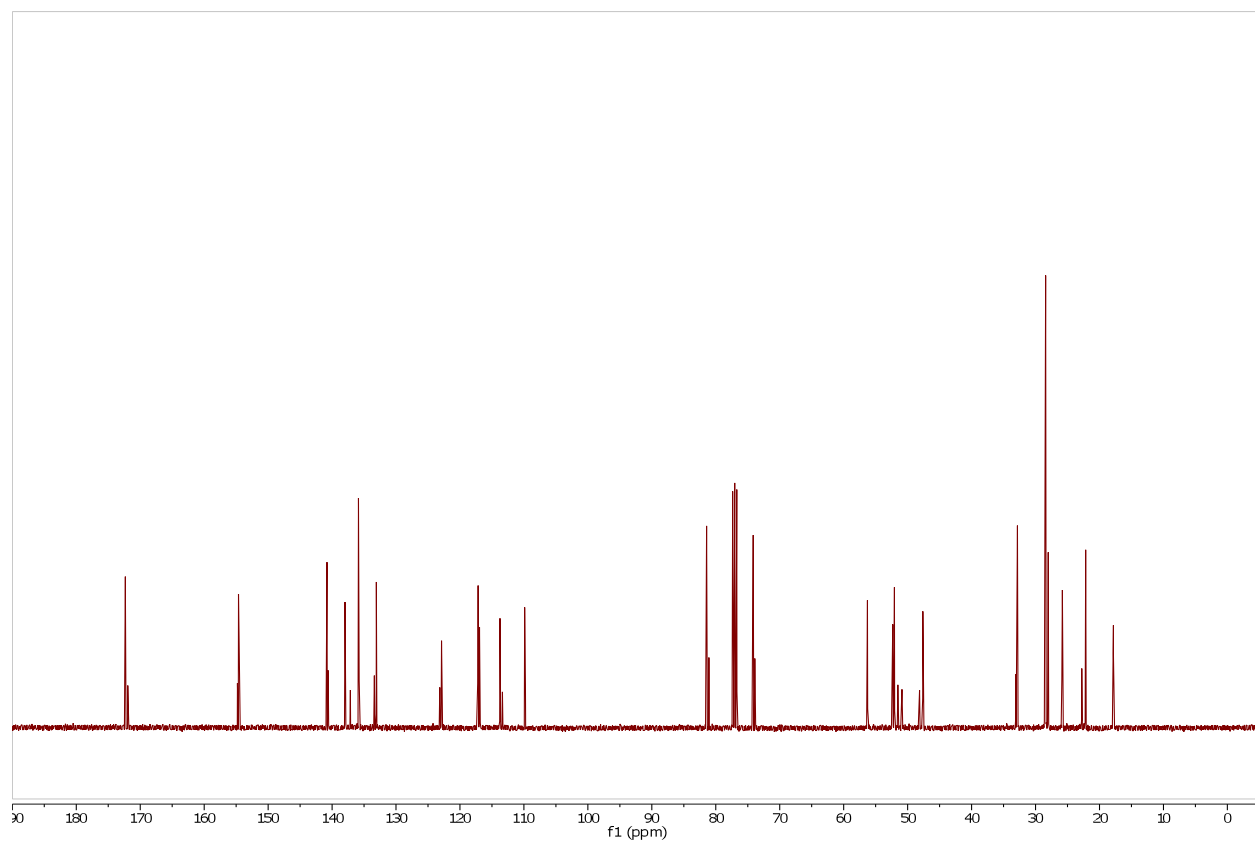

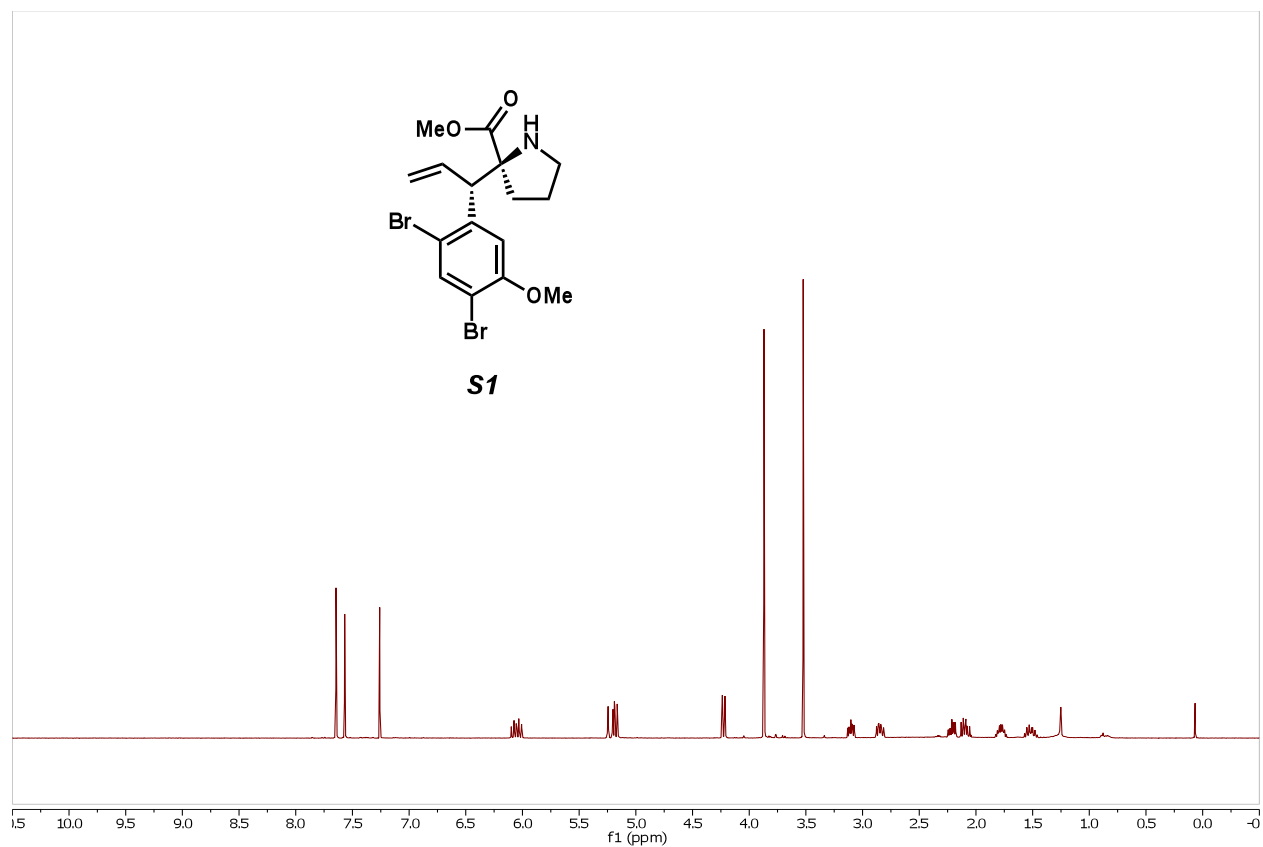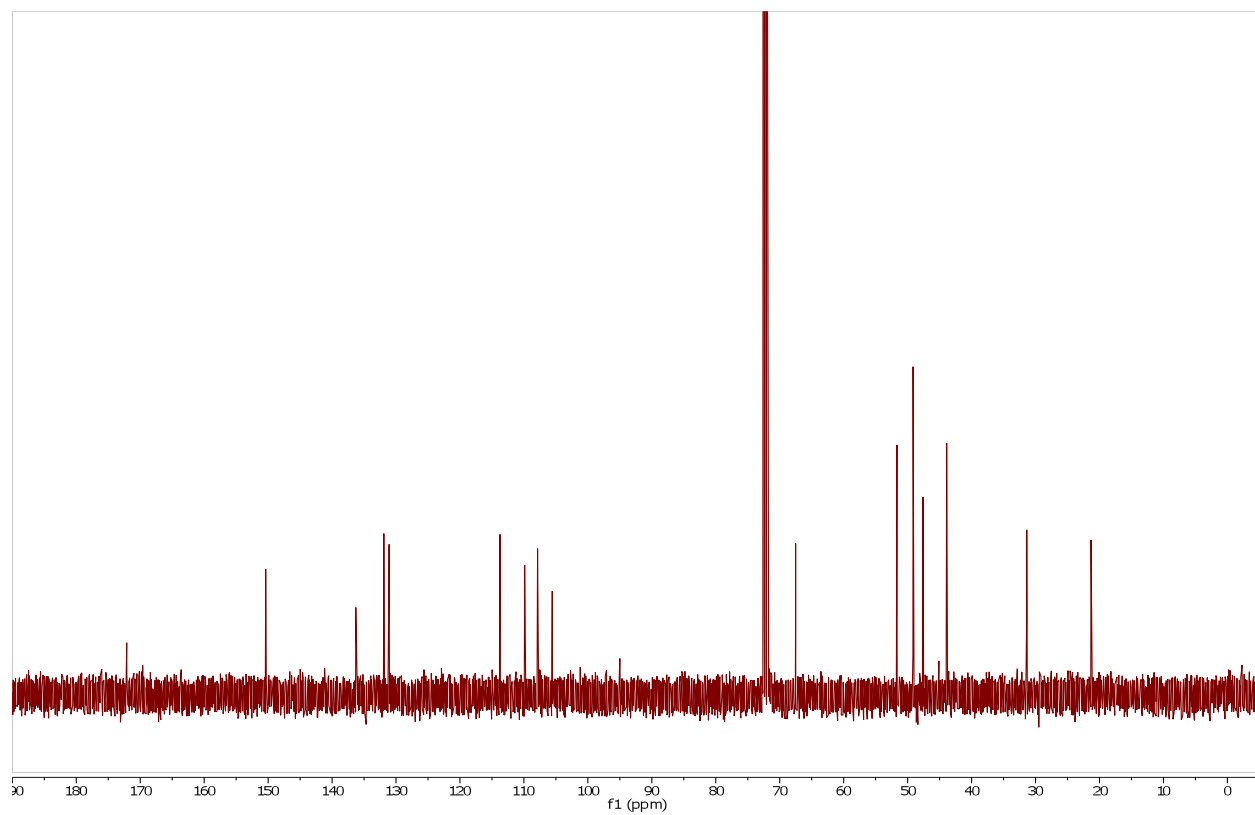

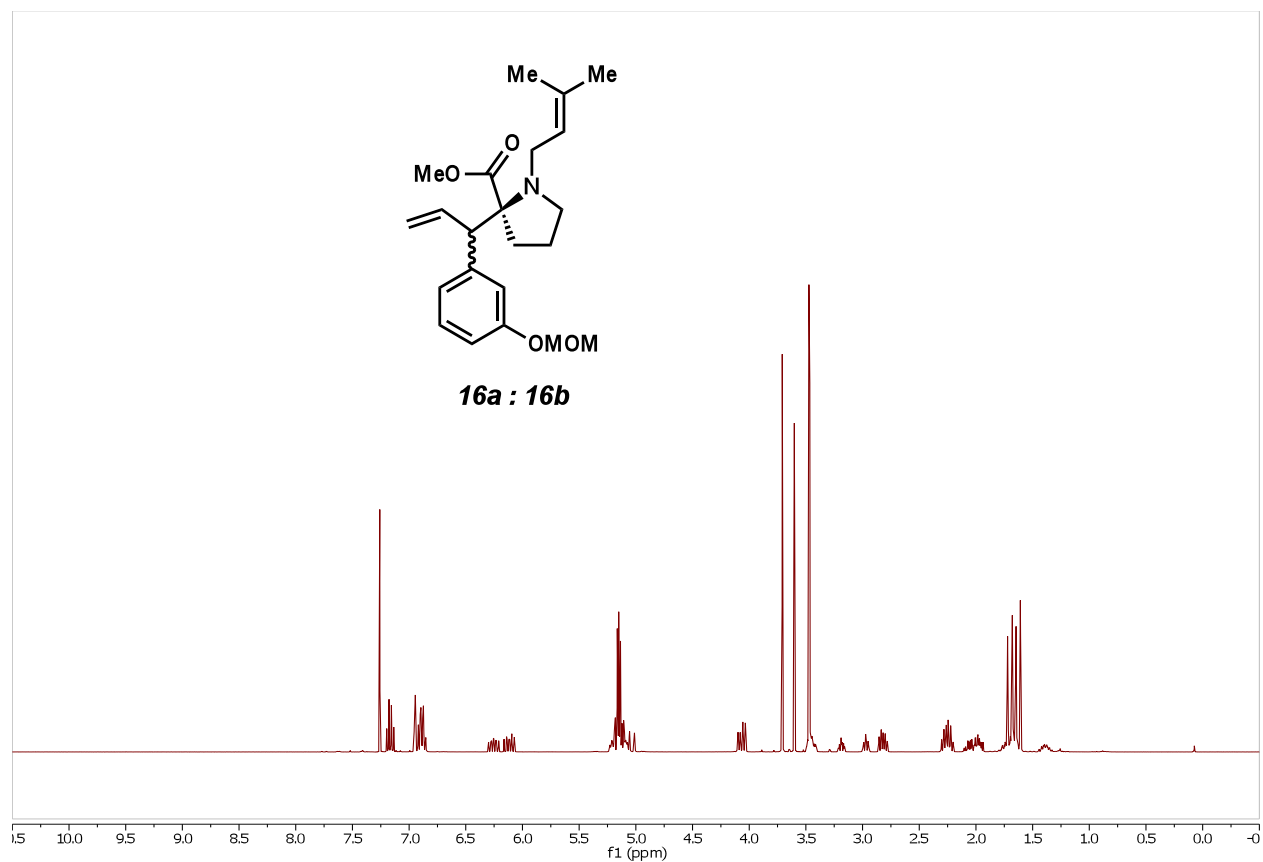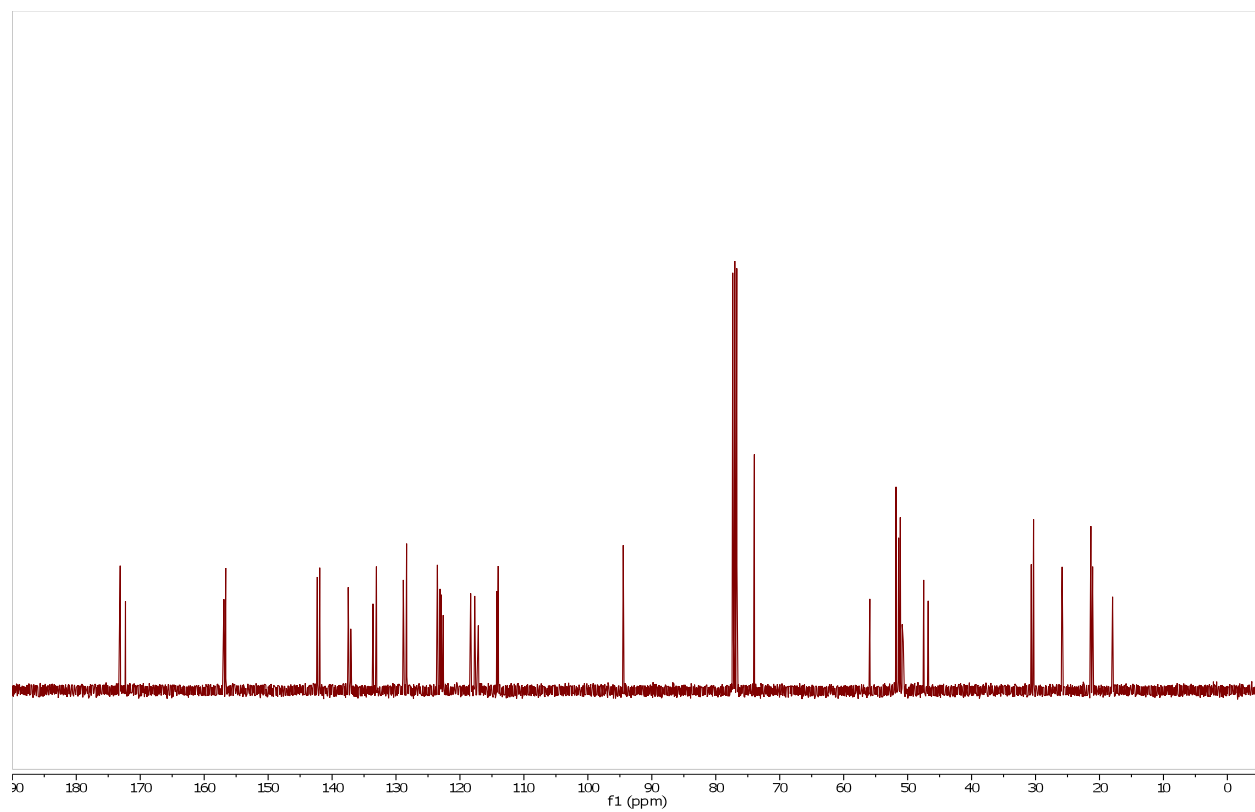

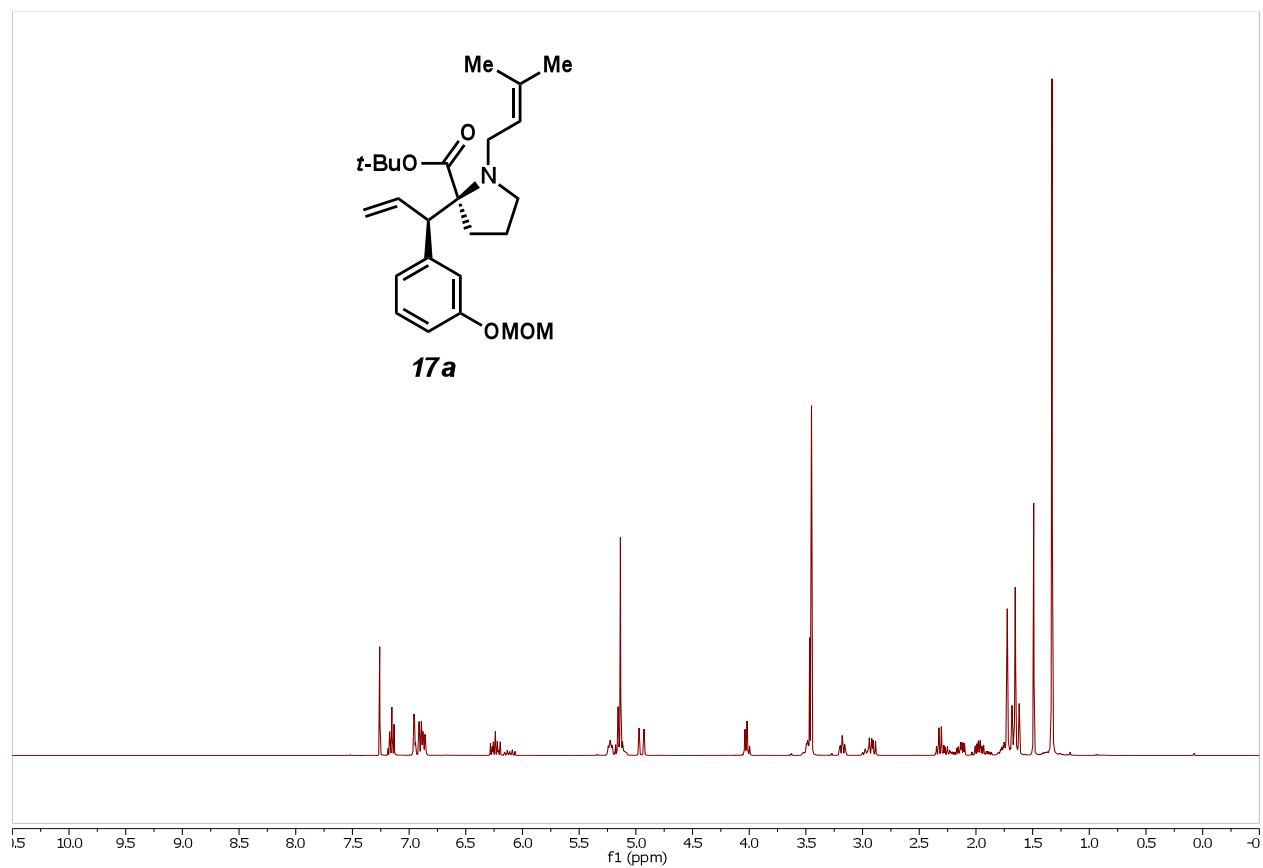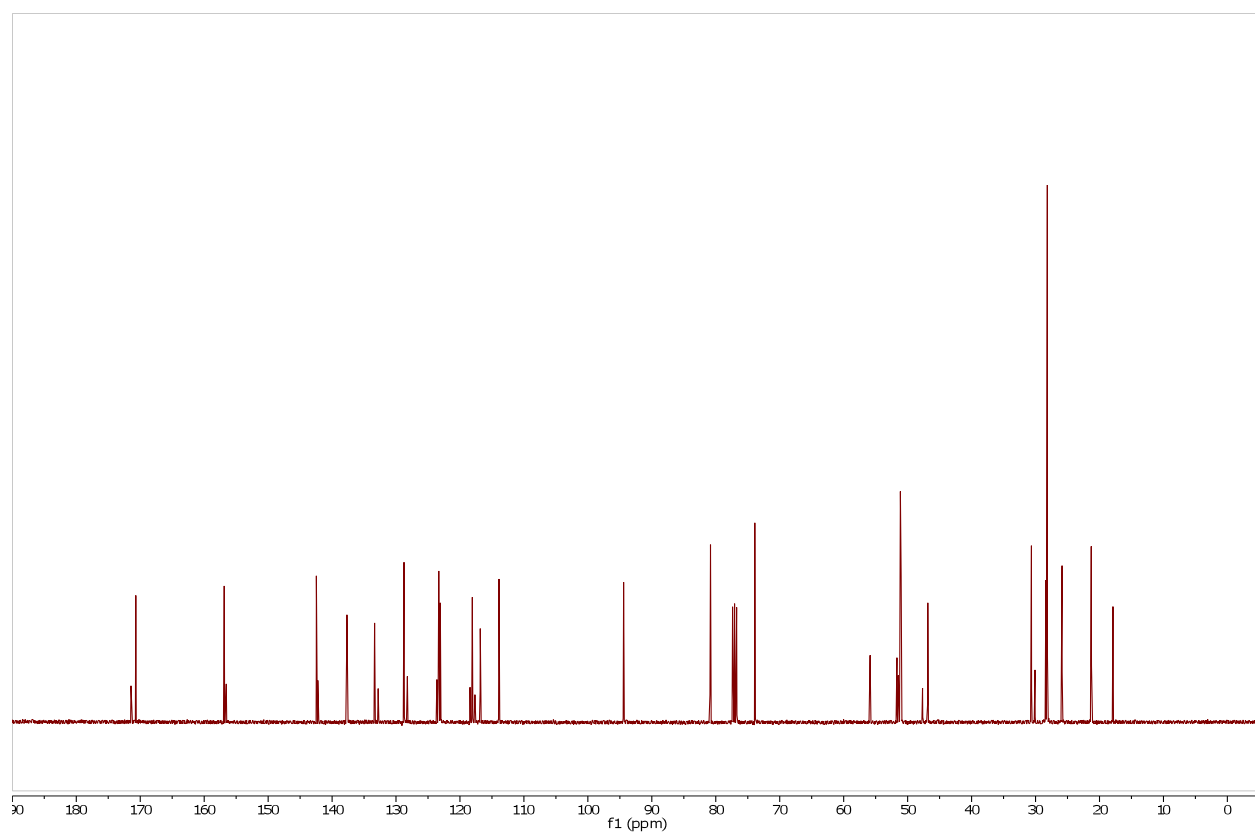

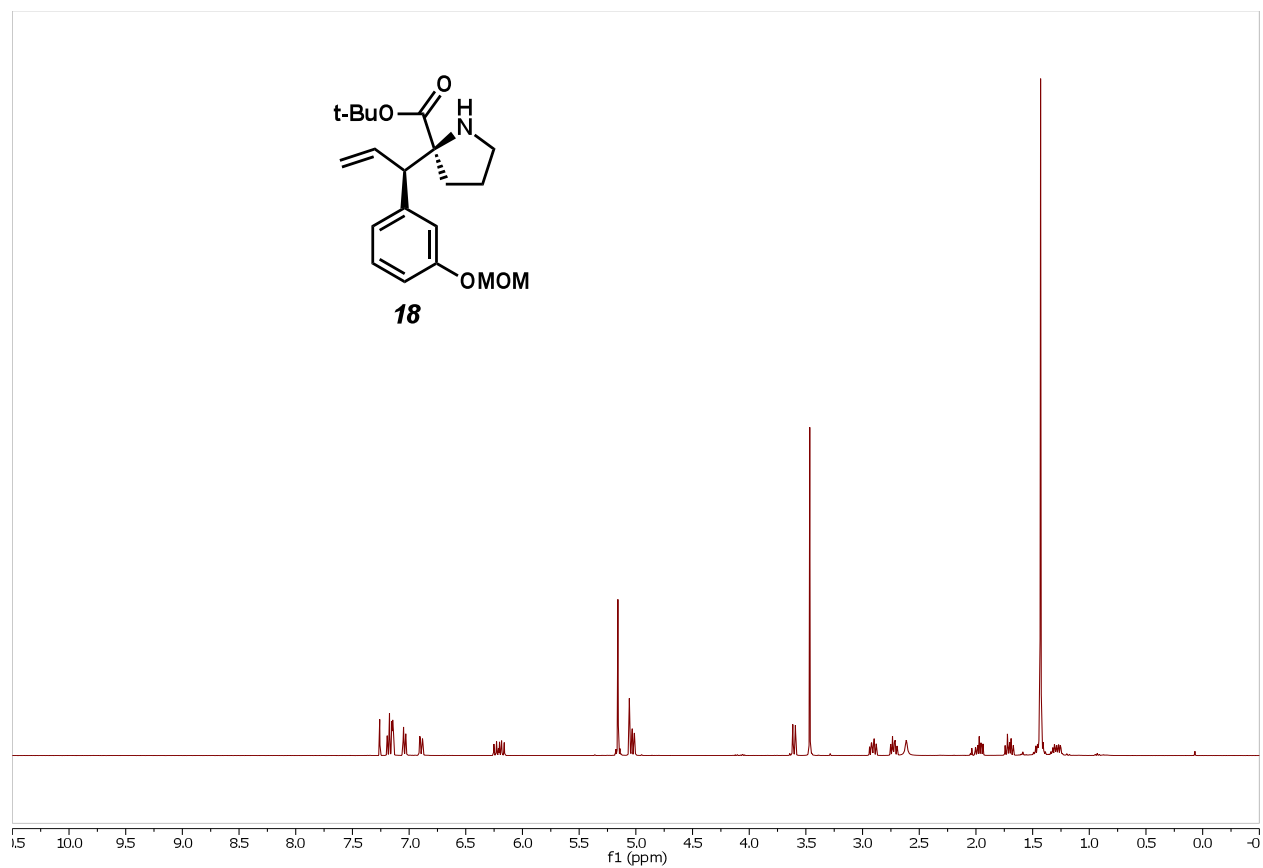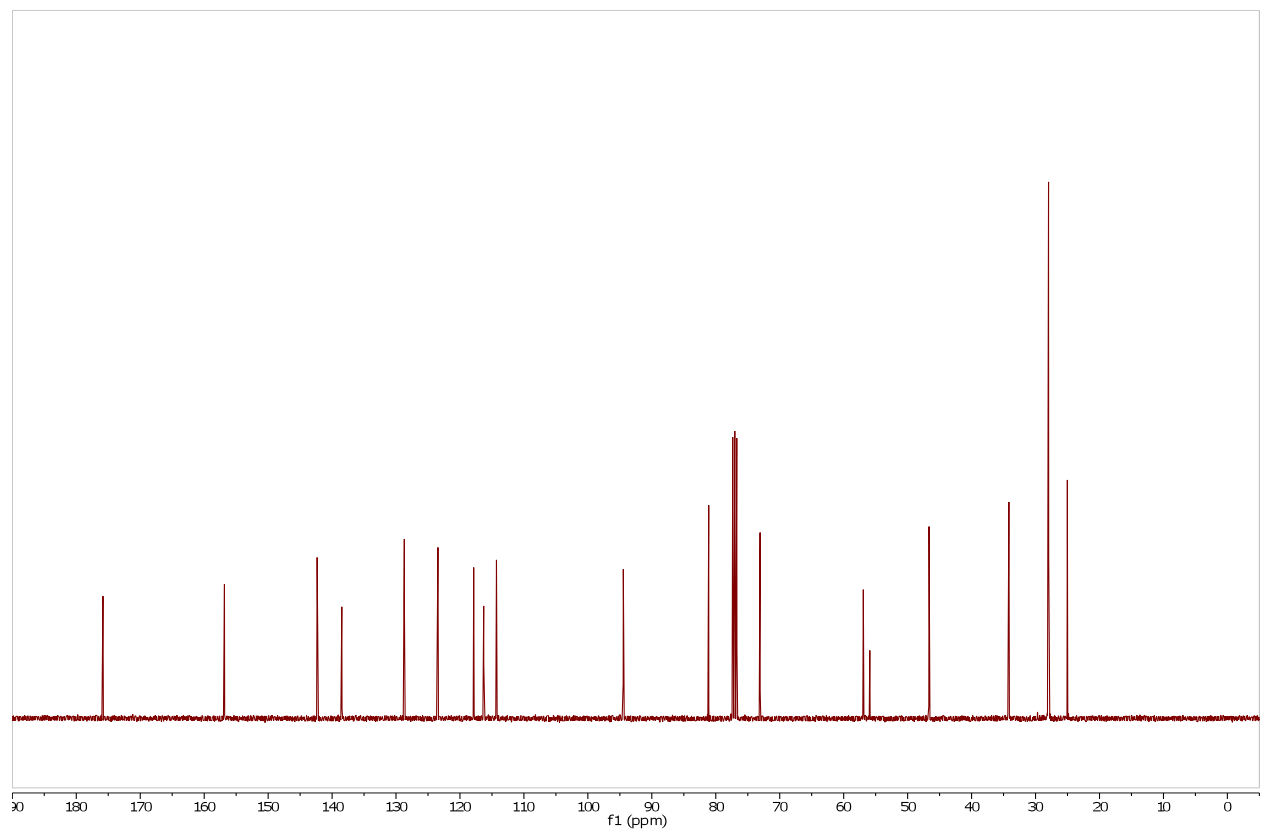

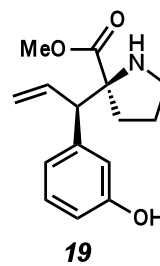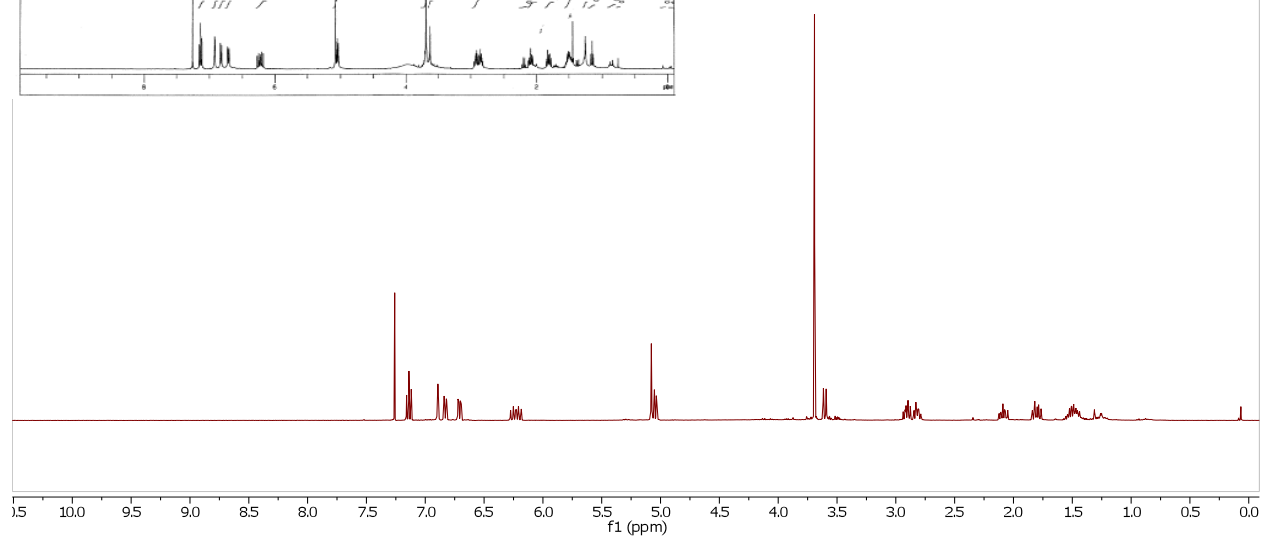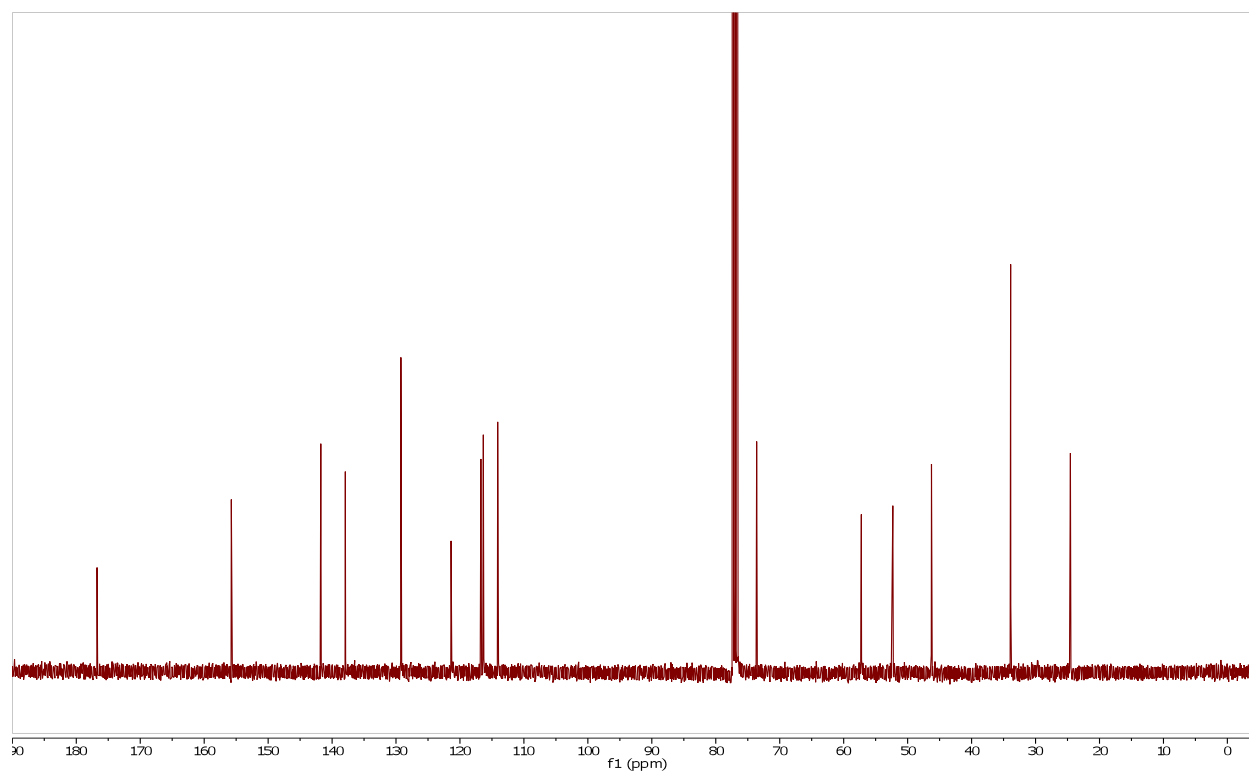



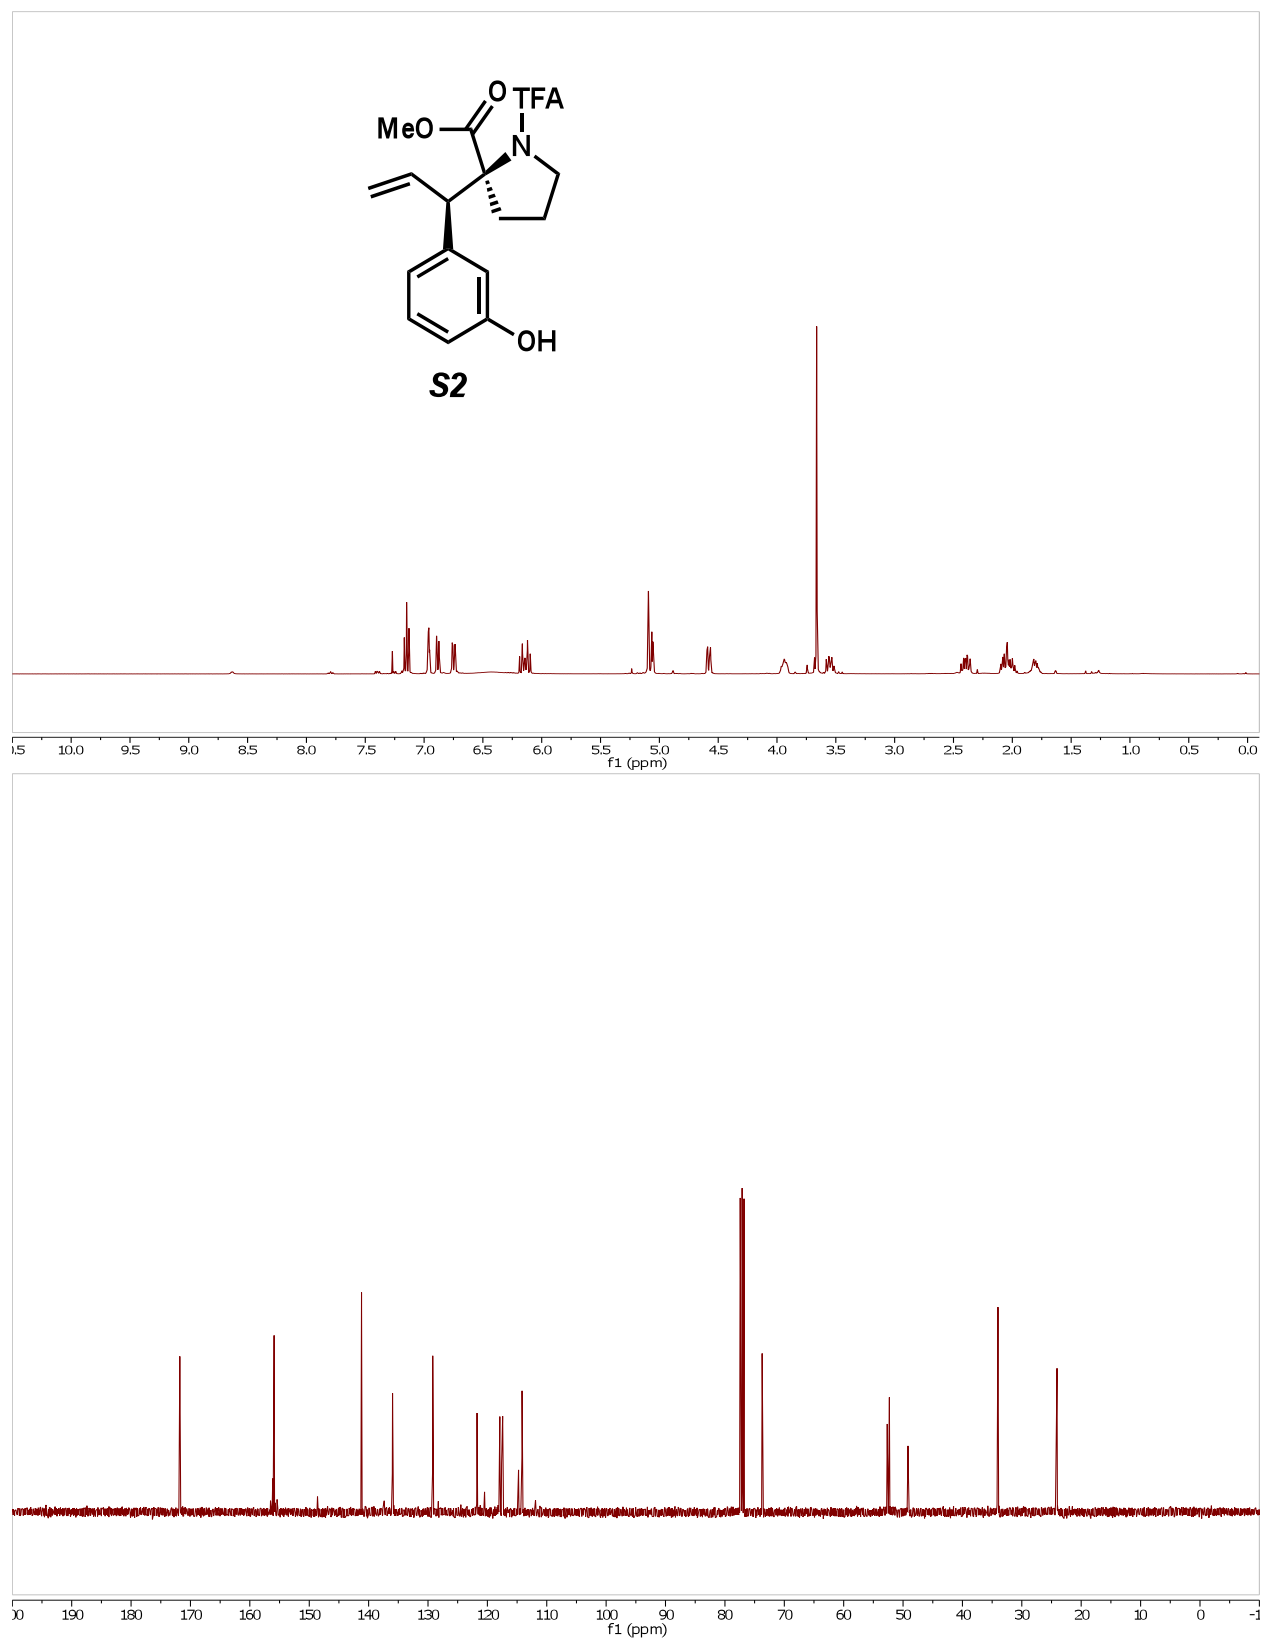

Supplement: Supplementary file 1 [file 4010155]
